# Supplementary material for: Altered Gene Expression and DNA Damage in Peripheral Blood Cells from Friedreich's Ataxia Patients: Cellular Model of Pathology
Source: PLoS Genet. 2010 Jan 15;6(1):e1000812. doi: 10.1371/journal.pgen.1000812 (PMC2799513; doi:10.1371/journal.pgen.1000812)
Supplement: Dataset S6 — The association of the DNA damage to predefined gene sets. (0.18 MB XLS) [file pgen.1000812.s018.xls]

## Sheet: gsa
Set ID	Set Name	dnaDamage Score	dnaDamage p-value	dnaDamage FDR
1241	HIPPOCAMPUS_DEVELOPMENT_NEONATAL	0.6485	0	0
1640	CMV_UV-CMV_COMMON_HCMV_6HRS_DN	0.5902	0	0
982	HASLINGER_B_CLL_MUTATED	0.7396	0	0
1275	STRESS_GENOTOXIC_SPECIFIC_DN	0.3362	0.002	0.4858
1650	VEGF_MMMEC_6HRS_UP	0.8039	0.002	0.4858
1122	DNMT1_KO_DN	0.9698	0.004	0.4858
1183	TPA_RESIST_EARLY_DN	0.3138	0.004	0.4858
1259	VEGF_MMMEC_ALL_UP	0.4594	0.004	0.4858
170	YE_INTRAMETASTATIC_HCC_UP	0.5719	0.004	0.4858
174	FLECHNER_KIDNEY_TRANSPLANT_WELL_DN	0.7134	0.004	0.4858
578	NUCLEAR_RECEPTORS	0.7843	0.004	0.4858
1476	VEGF_MMMEC_12HRS_UP	0.9358	0.006	0.5344
1599	IDX_TSA_UP_CLUSTER2	0.3284	0.006	0.5344
639	LE_MYELIN_DN	0.3911	0.006	0.5344
995	KANG_TERT_UP	0.5002	0.006	0.5344
1134	IDX_TSA_DN_CLUSTER3	0.3536	0.008	0.5625
1137	BRCA_ER_POS	0.1625	0.008	0.5625
238	AGUIRRE_PANCREAS_CHR22	0.5718	0.008	0.5625
331	AGUIRRE_PANCREAS_CHR19	0.4545	0.008	0.5625
1170	TSA_PANC50_UP	0.5713	0.01	0.6362
1490	CMV_HCMV_TIMECOURSE_1HR_DN	0.3664	0.01	0.6362
1057	TPA_RESIST_MIDDLE_DN	0.2773	0.016	0.8907
1299	TZD_ADIP_DN	0.4846	0.016	0.8907
1338	TSADAC_PANC50_UP	0.4691	0.016	0.8907
1323	UVC_LOW_ALL_UP	0.5855	0.018	0.9165
1566	CMV_HCMV_TIMECOURSE_16HRS_DN	0.3911	0.018	0.9165
1020	HDACI_COLON_TSA2HRS_UP	0.2849	0.022	0.9165
1074	UV-4NQO_FIBRO_UP	0.4034	0.022	0.9165
1257	UVC_TTD_4HR_UP	0.461	0.022	0.9165
657	OKUMURA_MC_LPS	0.1646	0.022	0.9165
93	CORDERO_KRAS_KD_VS_CONTROL_DN	0.2483	0.022	0.9165
1518	RESISTANCE_XENOGRAFTS_UP	0.5479	0.024	0.9165
539	ST_ADRENERGIC	0.343	0.024	0.9165
600	JECHLINGER_EMT_DN	0.3698	0.024	0.9165
1612	INSULIN_ADIP_INSENS_UP	0.52	0.026	0.9165
1438	CMV_24HRS_DN	0.4149	0.028	0.9165
1506	HDACI_COLON_TSA12HRS_UP	0.3379	0.028	0.9165
729	MAGRANGEAS_MULTIPLE_MYELOMA_IGL_VS_IGK_UP	0.5793	0.028	0.9165
1121	ADIPOCYTE_PPARG_UP	0.5428	0.032	0.9165
1344	UVC_TTD_ALL_UP	0.372	0.034	0.9165
1410	CALRES_RHESUS_UP	0.3016	0.034	0.9165
1402	RIBAVIRIN_RSV_UP	0.5147	0.036	0.9165
1494	HDACI_COLON_CLUSTER4	0.3793	0.036	0.9165
1545	CMV_ALL_DN	0.3098	0.036	0.9165
1591	4NQO_UNIQUE_FIBRO_UP	0.4178	0.038	0.9165
1642	NF90_DN	0.3538	0.038	0.9165
1622	CMV_HCMV_6HRS_DN	0.3525	0.04	0.9165
570	CHESLER_BRAIN_HIGHEST_VARIANCE_GENES	0.4804	0.04	0.9165
659	CHESLER_BRAIN_ONLY_SUBSET	0.4643	0.04	0.9165
904	STOSSI_ER_UP	0.3042	0.04	0.9165
1056	VEGF_MMMEC_3HRS_UP	0.2299	0.042	0.9165
1094	GH_HYPOPHYSECTOMY_RAT_DN	0.6728	0.042	0.9165
1010	ZHAN_MM_CD138_MS_VS_REST	0.4841	0.046	0.9165
422	FRUCTOSE_AND_MANNOSE_METABOLISM	0.4518	0.046	0.9165
855	MATSUDA_VALPHAINKT_DIFF	0.098	0.046	0.9165
1182	GH_EXOGENOUS_ANY_DN	0.2823	0.048	0.9165
1628	IFNALPHA_HCC_UP	0.4858	0.05	0.9165
396	LEE_MYC_E2F1_UP	0.2354	0.05	0.9165
415	OVARIAN_INFERTILITY_GENES	0.4482	0.05	0.9165
980	SCHRAETS_MLL_UP	0.3843	0.054	0.9165
1133	TGFBETA_C4_UP	0.4959	0.056	0.9165
1586	TGFBETA_LATE_UP	0.4026	0.056	0.9165
1614	GH_EXOGENOUS_LATE_DN	0.3001	0.056	0.9165
184	ERYTHPATHWAY	0.5552	0.056	0.9165
1406	EMT_DN	0.2787	0.058	0.9165
781	BECKER_TAMOXIFEN_RESISTANT_DN	0.2563	0.058	0.9165
979	ZHAN_MM_CD138_LB_VS_REST	0.3424	0.058	0.9165
111	FRASOR_ER_UP	0.3386	0.064	0.9165
1145	CITED1_KO_HET_UP	0.3443	0.064	0.9165
124	STRIATED_MUSCLE_CONTRACTION	0.3486	0.064	0.9165
1474	UVB_NHEK1_C2	0.3388	0.064	0.9165
1652	BRG1_SW13_UP	0.26	0.064	0.9165
1676	CMV_UV-CMV_COMMON_HCMV_6HRS_UP	0.3872	0.064	0.9165
123	BREAST_CANCER_ESTROGEN_SIGNALING	0.3415	0.066	0.9165
819	GERY_CEBP_TARGETS	0.182	0.07	0.9165
1445	CMV_HCMV_6HRS_UP	0.35	0.072	0.9165
609	PASSERINI_IMMUNE	0.2973	0.072	0.9165
1244	TGFBETA_C5_UP	0.457	0.076	0.9165
1276	IDX_TSA_UP_CLUSTER1	0.5384	0.076	0.9165
453	ST_GA13_PATHWAY	0.2234	0.076	0.9165
544	LEE_MYC_E2F1_DN	0.2154	0.076	0.9165
837	RORIE_ES_PNET_UP	0.3542	0.076	0.9165
1346	ADIP_DIFF_CLUSTER2	0.2733	0.078	0.9165
948	YANG_OSTECLASTS_SIG	0.3155	0.078	0.9165
646	PANTOTHENATE_AND_COA_BIOSYNTHESIS	0.3646	0.082	0.9165
1400	IL1_CORNEA_UP	0.195	0.084	0.9165
461	UEDA_MOUSE_SCN	0.1916	0.084	0.9165
1651	O6BG_RESIST_MEDULLOBLASTOMA_UP	0.3249	0.086	0.9165
1621	BRG1_H1299_UP	0.2379	0.088	0.9165
392	POMEROY_MD_TREATMENT_GOOD_VS_POOR_UP	0.3104	0.092	0.9165
1340	EMT_UP	0.2686	0.094	0.9165
1606	ADIP_DIFF_UP	0.1686	0.094	0.9165
476	KLEIN_PEL_UP	0.1784	0.094	0.9165
282	CHESLER_BRAIN_NEURAL_HIGH_GENES	0.3266	0.096	0.9165
419	AGUIRRE_PANCREAS_CHR17	0.1399	0.096	0.9165
55	WNT_SIGNALING	0.1664	0.096	0.9165
1089	METASTASIS_ADENOCARC_DN	0.2393	0.098	0.9165
1384	5FU_RESIST_GASTRIC_DN	0.4215	0.098	0.9165
149	MANALO_HYPOXIA_UP	0.2904	0.1	0.9165
1589	HDACI_COLON_TSABUT_UP	0.1694	0.1	0.9165
1637	ET743_SARCOMA_6HRS_UP	0.3196	0.1	0.9165
301	BYSTRYKH_HSC_BRAIN_CIS_GLOCUS	0.357	0.1	0.9165
1454	OLDWERNER_FIBRO_DN	0.1225	0.102	0.9165
177	NITROGEN_METABOLISM	0.3293	0.104	0.9165
960	HOFFMANN_BIVSBII_BI	0.1383	0.104	0.9165
1331	FSH_HUMAN_GRANULOSA_UP	0.2817	0.106	0.9165
312	SHIPP_DLBCL_CURED_UP	0.3524	0.106	0.9165
1231	HDACI_COLON_BUT2HRS_UP	0.1454	0.108	0.9165
1519	REFRACTORY_GASTRIC_UP	0.2417	0.108	0.9165
1469	DAC_PANC50_UP	0.3432	0.11	0.9165
755	LEE_MYC_TGFA_DN	0.2095	0.11	0.9165
91	HOX_GENES	0.2765	0.11	0.9165
744	POMEROY_DESMOPLASIC_VS_CLASSIC_MD_DN	0.2696	0.112	0.9165
78	TELPATHWAY	0.2442	0.112	0.9165
1107	UVB_NHEK1_UP	0.0974	0.114	0.9165
1387	LH_GRANULOSA_DN	0.1918	0.114	0.9165
1638	FSH_GRANULOSA_DN	0.1918	0.114	0.9165
849	JAIN_NEMO_DIFF	0.1702	0.114	0.9165
987	IRITANI_ADPROX_VASC	0.1521	0.116	0.9165
1319	ATRIA_UP	0.1459	0.118	0.9165
1540	TNFALPHA_ADIP_DN	0.162	0.118	0.9165
701	ASTON_DEPRESSION_DN	0.193	0.118	0.9165
1659	BRCA_BRCA1_NEG	0.1858	0.12	0.9165
1670	RETT_UP	0.2245	0.12	0.9165
212	ABRAHAM_MM_VS_AL_DN	0.3484	0.12	0.9165
1071	VEGF_HUVEC_30MIN_UP	0.2651	0.122	0.9165
216	CARBON_FIXATION	0.1982	0.122	0.9165
647	FRASOR_ER_DN	0.2819	0.122	0.9165
127	RADAEVA_IFNA_UP	0.3601	0.124	0.9165
1291	TSADAC_HYPOMETH_OVCA_UP	0.1497	0.124	0.9165
1388	TPA_SENS_EARLY_UP	0.2014	0.124	0.9165
494	INFLAMMATORY_RESPONSE_PATHWAY	0.2959	0.124	0.9165
968	YAGI_AML_PROG_FAB	0.088	0.124	0.9165
1023	IRS_KO_ADIP_DN	0.2759	0.126	0.9165
1186	XPB_TTD-CS_DN	0.3156	0.126	0.9165
1567	CMV_8HRS_DN	0.1751	0.126	0.9165
1687	HDACI_COLON_CURSUL_UP	0.1953	0.126	0.9165
860	ABBUD_LIF_DN	0.2428	0.128	0.9165
536	SHEPARD_CRASH_AND_BURN_MUT_VS_WT_DN	0.1544	0.13	0.9165
774	LEE_DENA_UP	0.1815	0.13	0.9165
822	IGLESIAS_E2FMINUS_UP	0.1511	0.13	0.9165
974	ZHAN_MULTIPLE_MYELOMA_VS_NORMAL_DN	0.203	0.13	0.9165
144	PHOSPHATIDYLINOSITOL_SIGNALING_SYSTEM	0.1595	0.132	0.9165
224	WNT_TARGETS	0.4106	0.132	0.9165
931	ABRAHAM_AL_VS_MM_UP	0.3084	0.132	0.9165
1337	HDACI_COLON_CUR24HRS_DN	0.2519	0.134	0.9165
146	GO_ROS	0.2113	0.134	0.9165
1521	HEARTFAILURE_ATRIA_UP	0.3204	0.134	0.9165
401	GRANDVAUX_IRF3_DN	0.3118	0.134	0.9165
762	CELL_CYCLE_REGULATOR	0.2732	0.134	0.9165
1663	OXSTRESS_RPE_H2O2HNE_DN	0.1491	0.138	0.9165
333	LIN_WNT_UP	0.2205	0.138	0.9165
1462	HDACI_COLON_TSA2HRS_DN	0.1854	0.14	0.9165
168	CALCIUM_REGULATION_IN_CARDIAC_CELLS	0.1923	0.14	0.9165
19	UEDA_MOUSE_LIVER	0.1102	0.14	0.9165
405	FETAL_LIVER_VS_ADULT_LIVER_GNF2	0.2321	0.142	0.9165
746	LEI_HOXC8_DN	0.2673	0.142	0.9165
1119	GAMMA-UV_FIBRO_DN	0.1433	0.144	0.9165
1174	CMV_HCMV_TIMECOURSE_8HRS_UP	0.203	0.144	0.9165
1507	IDX_TSA_UP_CLUSTER4	0.2549	0.144	0.9165
680	LAMB_CYCLIN_D1_UP	0.2761	0.144	0.9165
883	DORSEY_DOXYCYCLINE_UP	0.2037	0.144	0.9165
192	LEE_CIP_UP	0.219	0.146	0.9165
391	JECHLINGER_EMT_UP	0.1779	0.146	0.9165
525	ST_WNT_BETA_CATENIN_PATHWAY	0.19	0.146	0.9165
1042	INNEREAR_UP	0.2536	0.148	0.9165
447	NICOTINATE_AND_NICOTINAMIDE_METABOLISM	0.2582	0.148	0.9165
889	FALT_BCLL_UP	0.2648	0.148	0.9165
910	GAY_YY1_UP	0.1571	0.148	0.9165
1140	UVC_XPCS_4HR_UP	0.2811	0.15	0.9165
1487	AGED_MOUSE_NEOCORTEX_UP	0.1065	0.15	0.9165
1583	CALRES_MOUSE_UP	0.1657	0.152	0.9165
353	SHEPARD_GENES_COMMON_BW_CB_MO	0.1946	0.152	0.9165
708	SA_G1_AND_S_PHASES	0.3627	0.152	0.9165
742	ST_GAQ_PATHWAY	0.1995	0.152	0.9165
963	WALLACE_JAK2_DIFF	0.3963	0.152	0.9165
1016	MYOD_NIH3T3_UP	0.2237	0.154	0.9165
1075	GH_AUTOCRINE_DN	0.1515	0.154	0.9165
1356	HEARTFAILURE_VENTRICLE_DN	0.1212	0.154	0.9165
1373	GENOTOXINS_ALL_24HRS_REG	0.2618	0.154	0.9165
648	SMOOTH_MUSCLE_CONTRACTION	0.1273	0.154	0.9165
988	YAO_P4_KO_VS_WT_DN	0.3737	0.154	0.9165
1489	VENTRICLES_UP	0.0899	0.156	0.9165
1028	TPA_RESIST_LATE_DN	0.1895	0.158	0.9165
316	S1P_SIGNALING	0.1773	0.158	0.9165
469	PTDINSPATHWAY	0.2295	0.158	0.9165
955	LEE_TCELLS5_UP	0.2446	0.158	0.9165
1104	IFN_BETA_GLIOMA_UP	0.0743	0.16	0.9165
1294	AS3_FIBRO_DN	0.2064	0.16	0.9165
1495	UVC_LOW_ALL_DN	0.2116	0.16	0.9165
1520	HDACI_COLON_TSA_UP	0.1041	0.16	0.9165
927	WANG_MLL_CBP_VS_GMP_UP	0.1344	0.16	0.9165
1370	ADIP_VS_FIBRO_UP	0.2328	0.162	0.9165
985	HASLINGER_B_CLL_13Q14	0.2596	0.162	0.9165
1395	BRG1_ALAB_UP	0.204	0.164	0.9165
842	LEE_TCELLS7_UP	0.3409	0.164	0.9165
1523	FSH_OVARY_MCV152_UP	0.1085	0.166	0.9165
816	RUIZ_TENASCIN_TARGETS	0.1563	0.166	0.9165
1220	BAF57_BT549_UP	0.1797	0.17	0.9165
1497	UVB_NHEK3_C6	0.2016	0.17	0.9165
905	VERHAAK_AML_NPM1_MUT_VS_WT_DN	0.1619	0.17	0.9165
1227	TNFALPHA_TGZ_ADIP_UP	0.255	0.172	0.9165
1412	UVC_TTD_8HR_UP	0.2239	0.172	0.9165
1610	TGFBETA_ALL_UP	0.2311	0.172	0.9165
543	STEMPATHWAY	0.2628	0.172	0.9165
574	SA_TRKA_RECEPTOR	0.3141	0.172	0.9165
510	SIG_CD40PATHWAYMAP	0.1487	0.174	0.9165
1068	TNFA_NFKB_DEP_UP	0.2161	0.178	0.9165
1422	UVC_TTD-XPCS_COMMON_UP	0.1841	0.18	0.9165
1103	UVB_NHEK3_C5	0.1295	0.182	0.9165
1359	ET743_SARCOMA_72HRS_UP	0.1457	0.182	0.9165
1461	CMV_HCMV_TIMECOURSE_20HRS_DN	0.1768	0.182	0.9165
669	LEE_E2F1_DN	0.1682	0.182	0.9165
716	SHEPARD_POS_REG_OF_CELL_PROLIFERATION	0.156	0.182	0.9165
813	RORIE_ES_PNET_DN	0.3783	0.182	0.9165
1251	PARP_KO_UP	0.2128	0.184	0.9165
1189	TPA_SENS_MIDDLE_DN	0.0515	0.186	0.9165
1513	NAB_LUNG_DN	0.1852	0.188	0.9165
358	LEE_DENA_DN	0.1411	0.192	0.9165
1226	IFNALPHA_NL_UP	0.3285	0.194	0.9165
285	ROSS_FAB_M7	0.1459	0.194	0.9165
946	MOREAUX_TACI_HI_IN_BMPC	0.2303	0.194	0.9165
1246	HUMAN_TISSUE_PLACENTA	0.4847	0.196	0.9165
1594	H2O2_CSBCOMBINED	0.2215	0.196	0.9165
181	CROONQUIST_RAS_STROMA_DN	0.2206	0.196	0.9165
1038	AGED_MOUSE_MUSCLE_UP	0.1364	0.198	0.9165
1098	CMV_HCMV_TIMECOURSE_18HRS_DN	0.2166	0.198	0.9165
1657	AGED_MOUSE_HIPPOCAMPUS_ANY_DN	0.2093	0.198	0.9165
172	STATIN_PATHWAY_PHARMGKB	0.2507	0.198	0.9165
880	HOGERKORP_CD44_TEMPORALLY_DN	0.2728	0.198	0.9165
1002	BRUNO_IL3_DN	0.1456	0.2	0.9165
1063	UVC_LOW_C3_DN	0.2282	0.2	0.9165
452	DORSAM_HOXA9_DN	0.1916	0.2	0.9165
658	ROSS_PML_RAR	0.177	0.2	0.9165
1161	CMV_HCMV_TIMECOURSE_ALL_DN	0.0767	0.202	0.9165
1172	ELONGINA_KO_UP	0.0958	0.202	0.9165
1267	IDX_TSA_DN_CLUSTER5	0.1387	0.202	0.9165
1144	HPV31_DN	0.1679	0.204	0.9165
1428	INOS_ALL_DN	0.101	0.204	0.9165
787	HOFFMANN_BIVSBII_LGBII	0.1037	0.204	0.9165
939	HOFMANN_MANTEL_LYMPHOMA_VS_LYMPH_NODES_DN	0.1558	0.204	0.9165
1135	MOUSE_TISSUE_TESTIS	0.24	0.206	0.9165
1604	CMV_HCMV_TIMECOURSE_14HRS_DN	0.1308	0.206	0.9165
255	PROLIFERATION_GENES	0.0921	0.206	0.9165
39	DRUG_RESISTANCE_AND_METABOLISM	0.0844	0.206	0.9165
1192	GN_CAMP_GRANULOSA_DN	0.1774	0.208	0.9165
1525	HYPOXIA_REG_UP	0.1695	0.21	0.9165
243	CHAUVIN_ANDROGEN_REGULATED_GENES	0.1488	0.21	0.9165
724	ASTON_OLIGODENDROGLIA_MYELINATION_SUBSET	0.2896	0.21	0.9165
1035	ADIPOGENESIS_HMSC_CLASS3_UP	0.1197	0.212	0.9165
1084	BRCA1_OVEREXP_PROSTATE_UP	0.0918	0.212	0.9165
1391	UVC_LOW_C2_DN	0.2024	0.212	0.9165
1403	HYPOXIA_NORMAL_UP	0.0625	0.212	0.9165
1516	VEGF_HUVEC_2HRS_UP	0.246	0.212	0.9165
399	LYSINE_DEGRADATION	0.1427	0.214	0.9165
1385	NI2_MOUSE_DN	0.2094	0.216	0.9165
38	SRCRPTPPATHWAY	0.2453	0.216	0.9165
592	CELL_ADHESION	0.1498	0.216	0.9165
802	BOQUEST_CD31PLUS_VS_CD31MINUS_DN	0.2327	0.216	0.9165
1578	HSC_LTHSC_ADULT	0.1265	0.218	0.9165
1352	ADIP_VS_PREADIP_UP	0.1424	0.22	0.9165
1559	IDX_TSA_DN_CLUSTER2	0.0935	0.22	0.9165
166	SHEPARD_BMYB_MORPHOLINO_DN	0.0904	0.222	0.9165
1017	AGEING_KIDNEY_SPECIFIC_UP	0.154	0.224	0.9165
1528	TGZ_ADIP_UP	0.1587	0.224	0.9165
1534	GH_EXOGENOUS_LATE_UP	0.169	0.224	0.9165
622	G13_SIGNALING_PATHWAY	0.1136	0.224	0.9165
1310	DIAB_NEPH_UP	0.1912	0.226	0.9165
1623	HIF1_TARGETS	0.1856	0.226	0.9165
271	HOUSTIS_ROS	0.128	0.226	0.9165
1165	TSADAC_RKOSILENT_UP	0.2197	0.228	0.9165
36	SHEPARD_CELL_PROLIFERATION	0.0495	0.228	0.9165
513	CELL_PROLIFERATION	0.0495	0.228	0.9165
1232	HYPOXIA_FIBRO_UP	0.1526	0.23	0.9165
1300	CMV_HCMV_TIMECOURSE_14HRS_UP	0.0878	0.23	0.9165
313	HINATA_NFKB_DN	0.259	0.23	0.9165
897	STEFFEN_AML_PML_PLZF_TRGT	0.156	0.23	0.9165
956	LEE_TCELLS9_UP	0.1464	0.23	0.9165
1332	MYOD_BRG1_UP	0.1859	0.232	0.9165
843	HOGERKORP_CD44_DN	0.1699	0.232	0.9165
1013	FERRANDO_MLL_T_ALL_UP	0.1596	0.234	0.9165
156	INOSITOL_PHOSPHATE_METABOLISM	0.1542	0.234	0.9165
532	CALCINEURIN_NF_AT_SIGNALING	0.0748	0.236	0.9165
990	CROMER_HYPOPHARYNGEAL_MET_VS_NON_DN	0.1181	0.236	0.9165
59	ROME_INSULIN_2F_DN	0.1401	0.238	0.9165
1348	HDACI_COLON_CLUSTER9	0.111	0.24	0.9165
352	GPCRS_CLASS_B_SECRETIN_LIKE	0.2333	0.24	0.9165
1303	EGF_HDMEC_UP	0.1117	0.242	0.9165
1364	MMS_HUMAN_LYMPH_HIGH_24HRS_UP	0.1541	0.244	0.9165
936	TAKEDA_NUP8_HOXA9_6H_DN	0.1446	0.244	0.9165
629	GATA3PATHWAY	0.1641	0.246	0.9165
183	BIOSYNTHESIS_OF_STEROIDS	0.3242	0.248	0.9165
571	PHOTOSYNTHESIS	0.148	0.248	0.9165
940	MOREAUX_TACI_HI_VS_LOW_UP	0.1407	0.25	0.9165
151	GPCRDB_CLASS_B_SECRETIN_LIKE	0.2385	0.252	0.9165
699	TRKAPATHWAY	0.2393	0.252	0.9165
950	LEI_MYB_REGULATED_GENES	0.0669	0.252	0.9165
1450	ADIP_DIFF_CLUSTER1	0.0961	0.254	0.9165
1515	POD1_KO_MOST_UP	0.2092	0.254	0.9165
783	HADDAD_HSC_CD7_DN	0.105	0.254	0.9165
830	HADDAD_CD45CD7_PLUS_VS_MINUS_DN	0.105	0.254	0.9165
179	AGUIRRE_PANCREAS_CHR9	0.116	0.256	0.9165
191	ANDROGEN_AND_ESTROGEN_METABOLISM	0.1849	0.256	0.9165
503	BECKER_TAMOXIFEN_RESISTANT_UP	0.1099	0.258	0.9165
1163	IFNALPHA_NL_HCC_UP	0.2616	0.26	0.9165
1601	CANCERDRUGS_PROBCELL_UP	0.1552	0.26	0.9165
1625	CARIES_PULP_DN	0.1507	0.26	0.9165
790	ALCALAY_AML_NPMC_UP	0.0989	0.26	0.9165
998	FERRARI_4HPR_UP	0.1485	0.26	0.9165
1547	TGFBETA_C2_UP	0.273	0.262	0.9165
1629	AGED_MOUSE_CEREBELLUM_DN	0.1238	0.262	0.9165
1630	P53_BRCA1_UP	0.1287	0.262	0.9165
1646	HDACI_COLON_SUL24HRS_UP	0.0944	0.262	0.9165
293	IL17PATHWAY	0.1832	0.262	0.9165
439	COMPLEMENT_ACTIVATION_CLASSICAL	0.2828	0.264	0.9165
1034	ICF_DN	0.1887	0.268	0.9165
1169	HSC_HSC_SHARED	0.089	0.268	0.9165
1351	BCNU_GLIOMA_MGMT_48HRS_UP	0.158	0.268	0.9165
776	CHOLESTEROL_BIOSYNTHESIS	0.2094	0.268	0.9165
736	VEGFPATHWAY	0.145	0.27	0.9165
1164	HDACI_COLON_BUT_UP	0.0551	0.272	0.9165
198	BYSTRYKH_HSC_CIS_GLOCUS	0.0973	0.272	0.9165
211	RIBOSOMAL_PROTEINS	0.2644	0.272	0.9165
41	CDMACPATHWAY	0.2336	0.272	0.9165
1330	ADIP_DIFF_CLUSTER4	0.2302	0.274	0.9165
1537	HSC_LTHSC_SHARED	0.089	0.274	0.9165
1541	HSC_LTHSC_FETAL	0.089	0.274	0.9165
205	KIM_TH_CELLS_DN	0.2024	0.274	0.9165
888	CHEN_HOXA5_TARGETS_DN	0.1565	0.274	0.9165
1026	HDACI_COLON_CUR2HRS_UP	0.1103	0.276	0.9165
589	ELECTRON_TRANSPORTER_ACTIVITY	0.0799	0.276	0.9165
782	COMPPATHWAY	0.2775	0.276	0.9165
801	SCHURINGA_STAT5A_UP	0.1871	0.276	0.9165
1210	IFN_ALL_UP	0.1704	0.278	0.9165
1419	TPA_SENS_MIDDLE_UP	0.0857	0.278	0.9165
1530	H2O2_CSBRESCUED_C1_UP	0.0905	0.278	0.9165
1234	TSADAC_RKOEXP_UP	0.1689	0.28	0.9165
1680	HSC_HSC_FETAL	0.077	0.28	0.9165
383	PENG_LEUCINE_UP	0.0612	0.28	0.9165
614	BLOOD_CLOTTING_CASCADE	0.2122	0.28	0.9165
672	GLUTAMATE_METABOLISM	0.0998	0.28	0.9165
785	TAKEDA_NUP8_HOXA9_8D_UP	0.1324	0.28	0.9165
1067	CAMPTOTHECIN_PROBCELL_UP	0.1187	0.282	0.9165
1440	HDACI_COLON_BUT12HRS_DN	0.1331	0.282	0.9165
1661	HDACI_COLON_SUL12HRS_UP	0.1385	0.282	0.9165
318	SHEPARD_CRASH_AND_BURN_MUT_VS_WT_UP	0.0763	0.282	0.9165
872	MUNSHI_MM_VS_PCS_UP	0.0792	0.282	0.9165
938	HASLINGER_B_CLL_17P13	0.1755	0.282	0.9165
1304	ADIP_HUMAN_DN	0.2026	0.284	0.9165
379	NING_COPD_UP	0.0668	0.284	0.9165
667	ST_DICTYOSTELIUM_DISCOIDEUM_CAMP_CHEMOTAXIS_PATHWAY	0.0965	0.284	0.9165
1113	UVB_NHEK3_C2	0.1261	0.286	0.9165
1436	WERNER_FIBRO_UP	0.0785	0.286	0.9165
1517	HUMAN_TISSUE_TESTIS	0.1222	0.286	0.9165
1653	HSC_STHSC_ADULT	0.113	0.286	0.9165
859	ZHAN_PCS_MULTIPLE_MYELOMA_SPKD	0.1263	0.286	0.9165
1565	POD1_KO_UP	0.0898	0.288	0.9165
423	PROPANOATE_METABOLISM	0.1351	0.288	0.9165
656	FERRANDO_T_CELL_DIFFERENTIATION_PATHWAY	0.1465	0.288	0.9165
12	FLAGELLAR_ASSEMBLY	0.1217	0.29	0.9165
126	ATP_SYNTHESIS	0.1217	0.29	0.9165
308	TYPE_III_SECRETION_SYSTEM	0.1217	0.29	0.9165
520	MONOAMINE_GPCRS	0.2578	0.29	0.9165
590	WNTPATHWAY	0.0963	0.292	0.9165
741	MUNSHI_MM_UP	0.0743	0.292	0.9165
1253	DAC_IFN_BLADDER_UP	0.126	0.294	0.9165
1408	STRESS_ARSENIC_SPECIFIC_DN	0.088	0.294	0.9165
827	SANSOM_APC_4_DN	0.1359	0.294	0.9165
924	GILDEA_BLADDER_UP	0.1207	0.294	0.9165
451	WONG_IFNA_HCC_RESISTANT_VS_SENSITIVE_UP	0.1232	0.296	0.9165
636	ST_B_CELL_ANTIGEN_RECEPTOR	0.1194	0.296	0.9165
1217	BRCA1_OVEREXP_DN	0.1239	0.298	0.9165
1298	UVC_HIGH_D9_DN	0.1443	0.298	0.9165
923	GUO_HEX_DN	0.0708	0.298	0.9165
1350	OLDWERNER_FIBRO_UP	0.0766	0.3	0.9165
458	NFATPATHWAY	0.0703	0.3	0.9165
1460	WERNERONLY_FIBRO_UP	0.0801	0.302	0.9165
350	IL22BPPATHWAY	0.1985	0.302	0.9165
484	TGF_BETA_SIGNALING_PATHWAY	0.1018	0.302	0.9165
1349	LVAD_HEARTFAILURE_UP	0.067	0.304	0.9165
569	ERK5PATHWAY	0.1768	0.304	0.9165
9	PASSERINI_EM	0.1285	0.304	0.9165
601	WELCH_GATA1	0.1236	0.306	0.9165
750	RAC1PATHWAY	0.1366	0.306	0.9165
1360	ET743_SARCOMA_UP	0.1156	0.308	0.9165
178	NO1PATHWAY	0.1269	0.308	0.9165
219	TARTE_MATURE_PC	0.1081	0.308	0.9165
325	CORDERO_KRAS_KD_VS_CONTROL_UP	0.1006	0.308	0.9165
511	G_PROTEIN_SIGNALING	0.0566	0.308	0.9165
786	YAO_P4_KO_VS_WT_UP	0.1532	0.308	0.9165
909	TAVOR_CEBP_DN	0.0693	0.308	0.9165
1102	BCRABL_HL60_CDNA_DN	0.1274	0.31	0.9165
1159	TSA_CD4_UP	0.1277	0.31	0.9165
182	BADPATHWAY	0.098	0.31	0.9165
240	CHANG_SERUM_RESPONSE_DN	0.0503	0.31	0.9165
1211	OXSTRESS_RPE_HNETBH_DN	0.094	0.312	0.9165
1376	WERNER_FIBRO_DN	0.0338	0.312	0.9165
1553	IFN_GAMMA_UP	0.081	0.312	0.9165
247	PAR1PATHWAY	0.0893	0.312	0.9165
1024	IL6_FIBRO_UP	0.1265	0.314	0.9165
1649	HDACI_COLON_CUR24HRS_UP	0.1342	0.314	0.9165
953	BASSO_GERMINAL_CENTER_CD40_DN	0.0506	0.314	0.9165
1058	MYC_TARGETS	0.1323	0.316	0.9165
722	TESTIS_EXPRESSED_GENES	0.1393	0.316	0.9165
1110	STRESS_GENOTOXIC_SPECIFIC_UP	0.0884	0.32	0.9165
1111	HDACI_COLON_SUL_UP	0.0374	0.32	0.9165
143	ACHPATHWAY	0.1499	0.32	0.9165
56	CHEN_LUNG_SURVIVAL	0.1059	0.32	0.9165
1209	NI2_MOUSE_UP	0.0749	0.322	0.9165
1326	CIS_XPC_UP	0.0685	0.322	0.9165
1328	OLD_FIBRO_DN	0.0397	0.322	0.9165
1413	REOVIRUS_HEK293_DN	0.0524	0.322	0.9165
481	P53HYPOXIAPATHWAY	0.0909	0.322	0.9165
1563	NAB_LUNG_UP	0.1323	0.324	0.9165
297	PENTOSE_PHOSPHATE_PATHWAY	0.0668	0.324	0.9165
413	VALINE_LEUCINE_AND_ISOLEUCINE_DEGRADATION	0.1164	0.326	0.9165
1284	CMV_8HRS_UP	0.1139	0.328	0.9165
169	CHEMICALPATHWAY	0.0741	0.328	0.9165
457	IL6PATHWAY	0.1502	0.332	0.9165
877	ZHANG_EFT_EWSFLI1_UP	0.0756	0.332	0.9165
1389	INSULIN_ADIP_SENS_DN	0.1052	0.334	0.9165
280	HCC_SURVIVAL_GOOD_VS_POOR_UP	0.0992	0.334	0.9165
965	IRITANI_ADPROX_DN	0.0469	0.334	0.9165
137	IL3PATHWAY	0.1347	0.336	0.9165
1465	H2O2_CSBDIFF_C1	0.0798	0.336	0.9165
289	GALACTOSE_METABOLISM	0.0794	0.338	0.9165
387	TENEDINI_MEGAKARYOCYTIC_GENES	0.0572	0.338	0.9165
507	LEE_ACOX1_UP	0.0678	0.338	0.9165
740	PDGFPATHWAY	0.115	0.338	0.9165
1136	CMV_HCMV_TIMECOURSE_12HRS_UP	0.0964	0.34	0.9165
619	CELLCYCLEPATHWAY	0.0801	0.34	0.9165
914	KUMAR_HOXA_DIFF	0.0287	0.34	0.9165
1041	GENOTOXINS_4HRS_DISCR	0.0669	0.342	0.9165
1053	METHOTREXATE_PROBCELL_UP	0.1047	0.342	0.9165
1099	UVB_NHEK3_C8	0.0476	0.342	0.9165
1148	TPA_SENS_EARLY_DN	0.0138	0.342	0.9165
303	BRENTANI_CELL_CYCLE	0.0732	0.342	0.9165
1282	XPB_TTD-CS_UP	0.1013	0.344	0.9165
1524	CMV_HCMV_TIMECOURSE_8HRS_DN	0.1005	0.344	0.9165
482	G1PATHWAY	0.0702	0.344	0.9165
1088	TCELL_ANERGIC_UP	0.0989	0.346	0.9165
1191	AS3_FIBRO_C1	0.0691	0.346	0.9165
1407	AS3_FIBRO_C2	0.0691	0.346	0.9165
1429	OLD_FIBRO_UP	0.0527	0.346	0.9165
1654	OXSTRESS_RPE_H2O2TBH_DN	0.0691	0.346	0.9165
575	SMITH_HTERT_UP	0.0744	0.346	0.9165
1318	TPA_SENS_LATE_UP	0.0633	0.348	0.9165
1505	IRS1_KO_ADIP_UP	0.0389	0.348	0.9165
710	CERAMIDEPATHWAY	0.1042	0.348	0.9165
1374	TPA_RESIST_MIDDLE_UP	0.0394	0.35	0.9165
241	BIOGENIC_AMINE_SYNTHESIS	0.1267	0.35	0.9165
1254	BRCA1_OVEREXP_PROSTATE_DN	0.0377	0.352	0.9165
1444	TSA_HEPATOMA_CANCER_DN	0.0651	0.352	0.9165
1503	UVB_NHEK3_C1	0.0713	0.352	0.9165
463	DER_IFNA_UP	0.1115	0.352	0.9165
502	SANA_TNFA_ENDOTHELIAL_DN	0.0708	0.352	0.9165
69	INTRINSICPATHWAY	0.146	0.352	0.9165
814	LINDSTEDT_DEND_8H_VS_48H_DN	0.0417	0.354	0.9165
815	GALE_FLT3ANDAPL_DN	0.1107	0.354	0.9165
832	KANG_TERT_DN	0.1103	0.354	0.9165
1065	PREADIP_VS_FIBRO_UP	0.0572	0.356	0.9165
1207	HTERT_DN	0.1119	0.356	0.9165
1366	TSA_HEPATOMA_UP	0.0769	0.356	0.9165
1502	UVC_XPCS_8HR_UP	0.0444	0.356	0.9165
1588	H2O2_CSBRESCUED_UP	0.0601	0.356	0.9165
799	NADLER_OBESITY_DN	0.0741	0.356	0.9165
1569	HYPOXIA_RCC_UP	0.0468	0.358	0.9165
1051	CANCER_NEOPLASTIC_META_UP	0.1375	0.36	0.9165
432	ST_P38_MAPK_PATHWAY	0.0526	0.36	0.9165
45	AGUIRRE_PANCREAS_CHR1	0.1291	0.36	0.9165
605	P38MAPKPATHWAY	0.0555	0.36	0.9165
606	LEE_MYC_TGFA_UP	0.0346	0.36	0.9165
678	G1_TO_S_CELL_CYCLE_REACTOME	0.0723	0.36	0.9165
892	IRITANI_ADPROX_UP	0.0806	0.36	0.9165
1077	PLATELET_EXPRESSED	0.068	0.362	0.9165
1320	HG_PROGERIA_DN	0.0882	0.362	0.9165
598	RNA_TRANSCRIPTION_REACTOME	0.1645	0.362	0.9165
1439	TNFALPHA_4HRS_UP	0.058	0.366	0.9165
1538	TGFBETA_EARLY_UP	0.0965	0.366	0.9165
1631	HDACI_COLON_SUL48HRS_DN	0.0369	0.366	0.9165
651	RANKLPATHWAY	0.0552	0.366	0.9165
846	MARTINELLI_IFNS_DIFF	0.1427	0.366	0.9165
918	BENNETT_SLE_UP	0.1754	0.366	0.9165
1019	HBX_HEP_UP	0.0988	0.368	0.9165
155	PARK_HSC_VS_MPP_DN	0.1116	0.368	0.9165
1570	BCNU_GLIOMA_MGMT_48HRS_DN	0.0843	0.368	0.9165
200	THELPERPATHWAY	0.0743	0.368	0.9165
1198	TNFALPHA_TGZ_ADIP_DN	0.0723	0.37	0.9165
1245	HSC_STHSC_FETAL	0.0862	0.37	0.9165
1390	UV_UNIQUE_FIBRO_DN	0.0481	0.37	0.9165
1557	HSC_STHSC_SHARED	0.0862	0.37	0.9165
687	CELL_ADHESION_MOLECULE_ACTIVITY	0.0669	0.37	0.9165
959	NICK_RHAPC_UP	0.0767	0.37	0.9165
1126	UV_UNIQUE_FIBRO_UP	0.0565	0.372	0.9165
420	BYSTROM_IL5_UP	0.0314	0.372	0.9165
582	HEMATOPOESIS_RELATED_TRANSCRIPTION_FACTORS	0.0584	0.372	0.9165
64	KLEIN_PEL_DN	0.0726	0.372	0.9165
863	PARK_MSCS_LIN2	0.057	0.372	0.9165
1197	HYPOXIA_REVIEW	0.0639	0.374	0.9165
1684	IFN_ANY_UP	0.0589	0.374	0.9165
134	AGUIRRE_PANCREAS_CHR12	0.0593	0.376	0.9165
154	DNA_DAMAGE_SIGNALING	0.061	0.376	0.9165
754	P53_SIGNALING	0.0309	0.376	0.9165
1005	WALKER_MM_SNP_DIFF	0.0803	0.378	0.9165
1543	TIS7_OVEREXP_DN	0.1127	0.378	0.9165
201	HIVNEFPATHWAY	0.0442	0.378	0.9165
274	PASSERINI_OXIDATION	0.0883	0.378	0.9165
794	GALINDO_ACT_UP	0.0717	0.378	0.9165
1561	TPA_SENS_LATE_DN	0.0213	0.38	0.9165
957	XU_CBP_UP	0.0669	0.38	0.9165
96	NUCLEOTIDE_METABOLISM	0.1009	0.38	0.9165
1672	HSC_HSC_ADULT	0.0433	0.382	0.9165
862	ZHAN_MM_CD138_CD2_VS_REST	0.0406	0.382	0.9165
1152	STEMCELL_COMMON_DN	0.0405	0.384	0.9165
1249	JNK_DN	0.071	0.384	0.9165
1341	DAC_PANC_UP	0.0685	0.384	0.9165
361	FLECHNER_KIDNEY_TRANSPLANT_REJECTION_PBL_DN	0.0802	0.384	0.9165
1076	HDACI_COLON_SUL12HRS_DN	0.0388	0.386	0.9165
1181	INSULIN_NIH3T3_UP	0.0672	0.386	0.9165
286	P53PATHWAY	0.0927	0.386	0.9165
653	LAIRPATHWAY	0.0652	0.386	0.9165
679	NKCELLSPATHWAY	0.0955	0.386	0.9165
727	PTENPATHWAY	0.0869	0.386	0.9165
80	LIZUKA_L1_GR_G1	0.0545	0.386	0.9165
1000	TAKEDA_NUP8_HOXA9_10D_UP	0.0353	0.388	0.9165
1001	ZHAN_MM_CD138_MF_VS_REST	0.0393	0.388	0.9165
1394	ELONGINA_KO_DN	0.0343	0.388	0.9165
1535	JNK_UP	0.0468	0.388	0.9165
428	MTA3PATHWAY	0.0918	0.388	0.9165
120	IL7PATHWAY	0.091	0.39	0.9165
1277	HYPOPHYSECTOMY_RAT_UP	0.081	0.39	0.9165
1379	VEGF_HUVEC_UP	0.0803	0.39	0.9165
376	SIG_REGULATION_OF_THE_ACTIN_CYTOSKELETON_BY_RHO_GTPASES	0.0641	0.39	0.9165
534	PMLPATHWAY	0.0606	0.39	0.9165
581	AT1RPATHWAY	0.061	0.39	0.9165
997	HOFMANN_MDS_CD34_LOW_AND_HIGH_RISK	0.0489	0.39	0.9165
1108	ROS_MOUSE_AORTA_UP	0.0596	0.392	0.9165
1250	AGED_MOUSE_CEREBELLUM_UP	0.0351	0.392	0.9165
186	HOGERKORP_ANTI_CD44_UP	0.0577	0.392	0.9165
810	HOFFMANN_BIVSBII_IMVM	0.0355	0.392	0.9165
1184	UVC_XPCS_ALL_UP	0.0286	0.394	0.9165
1283	CITED1_KO_HET_DN	0.0651	0.394	0.9165
1656	ADIP_DIFF_CLUSTER3	0.0399	0.394	0.9165
235	MRNA_PROCESSING	0.1273	0.394	0.9165
1448	TSA_RKO_UP	0.0589	0.396	0.9165
684	PORPHYRIN_AND_CHLOROPHYLL_METABOLISM	0.0505	0.396	0.9165
839	VANASSE_BCL2_TARGETS	0.0328	0.396	0.9165
970	WANG_MLL_CBP_VS_GMP_DN	0.0674	0.396	0.9165
557	CROONQUIST_IL6_STROMA_UP	0.0524	0.398	0.9165
1355	CREB_BRAIN_2WKS_UP	0.0622	0.4	0.9165
1441	DFOSB_BRAIN_8WKS_UP	0.0391	0.4	0.9165
1667	CANTHARIDIN_DN	0.1031	0.4	0.9165
512	EGFPATHWAY	0.0583	0.4	0.9165
244	EPONFKBPATHWAY	0.0924	0.402	0.9165
471	PS1PATHWAY	0.0595	0.402	0.9165
475	MANALO_HYPOXIA_DN	0.085	0.402	0.9165
981	ZHAN_MMPC_SIM_BC_AND_MM	0.0507	0.402	0.9165
1223	HDACI_COLON_SUL48HRS_UP	0.0156	0.404	0.9165
1456	IRS1_KO_ADIP_DN	0.0207	0.404	0.9165
1573	HDACI_COLON_CUR_UP	0.0618	0.404	0.9165
1443	5FU_RESIST_GASTRIC_UP	0.0593	0.406	0.9165
175	BYSTRYKH_HSC_BRAIN_TRANS_GLOCUS	0.0302	0.406	0.9165
26	SIG_INSULIN_RECEPTOR_PATHWAY_IN_CARDIAC_MYOCYTES	0.0525	0.406	0.9165
748	MOOTHA_VOXPHOS	0.1187	0.406	0.9165
1196	IGF_VS_PDGF_UP	0.0621	0.408	0.9165
1433	ET743_RESIST_UP	0.0558	0.408	0.9165
360	CELL_GROWTH_AND_OR_MAINTENANCE	0.0275	0.408	0.9165
864	HALMOS_CEBP_DN	0.0528	0.408	0.9165
1263	STRESS_TPA_SPECIFIC_UP	0.027	0.41	0.9165
531	TCRAPATHWAY	0.0981	0.41	0.9165
695	TCRPATHWAY	0.0562	0.41	0.9165
1229	HUMAN_TISSUE_PANCREAS	0.0452	0.412	0.9165
1539	ET743_HELA_UP	0.0363	0.412	0.9165
441	ST_JNK_MAPK_PATHWAY	0.0365	0.412	0.9165
640	ECMPATHWAY	0.061	0.412	0.9165
766	PROTEASOMEPATHWAY	0.1436	0.412	0.9165
84	AGUIRRE_PANCREAS_CHR6	0.0668	0.412	0.9165
414	IL2PATHWAY	0.0595	0.414	0.9165
844	ZHAN_MM_CD138_CD1_VS_REST	0.0506	0.414	0.9165
976	CHIARETTI_T_ALL_DIFF	0.0165	0.414	0.9165
227	DEATHPATHWAY	0.0438	0.416	0.9165
1036	IGF1_NIH3T3_UP	0.0189	0.418	0.9165
340	CXCR4PATHWAY	0.0505	0.418	0.9165
462	LEE_MYC_DN	0.0489	0.418	0.9165
887	ZHAN_MM_MOLECULAR_CLASSI_UP	0.0231	0.418	0.9165
1297	IFNA_HCMV_6HRS_UP	0.0902	0.42	0.9165
1600	PRMT5_KD_DN	0.0467	0.42	0.9165
245	BRENTANI_REPAIR	0.0712	0.42	0.9165
661	GNATENKO_PLATELET	0.0323	0.42	0.9165
817	GNATENKO_PLATELET_UP	0.0323	0.42	0.9165
836	JISON_SICKLECELL_DIFF	0.0242	0.42	0.9165
702	CHANG_SERUM_RESPONSE_UP	0.0583	0.422	0.9165
756	PPARAPATHWAY	0.048	0.422	0.9165
991	NADLER_OBESITY_UP	0.0361	0.422	0.9165
1153	CMV_HCMV_TIMECOURSE_4HRS_DN	0.0198	0.424	0.9165
319	NING_COPD_DN	0.0178	0.424	0.9165
1049	OLDAGE_DN	0.0595	0.426	0.9165
1147	UVB_NHEK3_C7	0.0541	0.426	0.9165
1582	UVB_NHEK2_UP	0.0618	0.426	0.9165
1682	UVC_HIGH_D4_DN	0.0444	0.426	0.9165
773	ARFPATHWAY	0.0693	0.426	0.9165
908	NAKAJIMA_MCSMBP_MAST	0.0206	0.426	0.9165
1011	HOFMANN_MDS_CD34_HIGH_RISK	0.0219	0.428	0.9165
1365	HDACI_COLON_SUL24HRS_DN	0.0116	0.428	0.9165
992	ZHAN_MMPC_PC	0.086	0.428	0.9165
1109	HSC_INTERMEDIATEPROGENITORS_FETAL	0.0185	0.432	0.9165
1587	HDACI_COLON_BUT16HRS_UP	0.0278	0.432	0.9165
16	G2PATHWAY	0.0514	0.432	0.9165
1018	CREB_BRAIN_8WKS_UP	0.0223	0.434	0.9165
1190	IL6_SCAR_FIBRO_UP	0.0347	0.434	0.9165
1333	TSA_HEPATOMA_CANCER_UP	0.03	0.434	0.9165
1645	CAMPTOTHECIN_PROBCELL_DN	0.0564	0.434	0.9165
662	LU_IL4BCELL	0.0243	0.434	0.9165
1296	GH_EXOGENOUS_MIDDLE_UP	0.0374	0.436	0.9165
2	PENG_RAPAMYCIN_DN	0.0442	0.436	0.9165
498	UNDERHILL_PROLIFERATION	0.0453	0.436	0.9165
973	SANSOM_APC_LOSS5_UP	0.0257	0.436	0.9165
1242	GH_AUTOCRINE_UP	0.0222	0.438	0.9165
1556	IGF_VS_PDGF_DN	0.0193	0.438	0.9165
1219	CPR_NULL_LIVER_DN	0.0074	0.44	0.9165
125	HUMAN_MITODB_6_2002	0.0408	0.44	0.9165
1611	IFNA_UV-CMV_COMMON_HCMV_6HRS_UP	0.0722	0.44	0.9165
541	IGF1PATHWAY	0.0282	0.44	0.9165
615	MRNA_PROCESSING_REACTOME	0.0604	0.44	0.9165
621	ZUCCHI_EPITHELIAL_UP	0.0168	0.44	0.9165
765	APOPTOSIS	0.0223	0.44	0.9165
1127	BRCA1KO_MEF_DN	0.0365	0.442	0.9165
1265	OLDONLY_FIBRO_UP	0.0378	0.442	0.9165
1644	IFN_BETA_UP	0.0301	0.442	0.9165
1280	HIPPOCAMPUS_DEVELOPMENT_PRENATAL	0.0467	0.444	0.9165
1447	SERUM_FIBROBLAST_CORE_DN	0.0056	0.444	0.9165
1575	HEARTFAILURE_ATRIA_DN	0.0269	0.444	0.9165
1660	CISPLATIN_PROBCELL_UP	0.0618	0.444	0.9165
246	HADDAD_HSC_CD10_UP	0.0152	0.444	0.9165
276	APOPTOSIS_GENMAPP	0.0482	0.444	0.9165
643	POMEROY_DESMOPLASIC_VS_CLASSIC_MD_UP	0.0537	0.446	0.9165
373	HCC_SURVIVAL_GOOD_VS_POOR_DN	0.0458	0.448	0.9165
747	PARK_HSC_VS_MPP_UP	0.0405	0.448	0.9165
851	RADMACHER_AMLNORMALKARYTYPE_SIG	0.0084	0.448	0.9165
1290	UVB_NHEK4_6HRS_DN	0.0233	0.45	0.9165
1329	ROS_MOUSE_AORTA_DN	0.0094	0.45	0.9165
275	PASSERINI_ADHESION	0.0262	0.45	0.9165
871	NEMETH_TNF_UP	0.0111	0.45	0.9165
1609	ET743_RESIST_DN	0.0344	0.452	0.9165
264	CSKPATHWAY	0.0383	0.452	0.9165
416	IGF1RPATHWAY	0.0648	0.452	0.9165
445	NGFPATHWAY	0.0341	0.452	0.9165
663	RARRXRPATHWAY	0.0335	0.452	0.9165
686	AMIPATHWAY	0.0383	0.452	0.9165
732	TARTE_BCELL	0.0352	0.452	0.9165
947	ABBUD_LIF_UP	0.022	0.452	0.9165
1581	BRCA2_BRCA1_UP	0.0344	0.454	0.9165
28	CHIARETTI_T_ALL	0.0103	0.454	0.9165
1375	P21_ANY_DN	0.0781	0.456	0.9165
1479	ESR_FIBROBLAST_UP	0.0152	0.456	0.9165
1585	CMV_HCMV_TIMECOURSE_24HRS_DN	0.0096	0.456	0.9165
1664	AGED_MOUSE_CORTEX_DN	0.0255	0.456	0.9165
448	ETSPATHWAY	0.0238	0.456	0.9165
483	GSK3PATHWAY	0.0346	0.456	0.9165
1070	DAC_BLADDER_UP	0.0197	0.458	0.9165
625	FETAL_LIVER_ENRICHED_TRANSCRIPTION_FACTORS	0.0152	0.458	0.9165
693	MYOSINPATHWAY	0.0206	0.458	0.9165
895	FERRANDO_MLL_T_ALL_DN	0.0369	0.458	0.9165
13	SA_B_CELL_RECEPTOR_COMPLEXES	0.0296	0.46	0.9165
359	EDG1PATHWAY	0.0316	0.46	0.9165
690	WILLERT_WNT_NCCIT_ALL_UP	0.0494	0.46	0.9165
1405	BREASTCA_THREE_CLASSES	0.0288	0.462	0.9165
576	MITOCHONDRIA	0.0295	0.462	0.9165
232	PENG_RAPAMYCIN_UP	0.0113	0.464	0.9165
1195	UVC_HIGH_D7_DN	0.0104	0.468	0.9165
1499	UVB_NHEK3_C3	0.0131	0.468	0.9165
493	ST_ERK1_ERK2_MAPK_PATHWAY	0.0247	0.468	0.9165
109	CARM_ERPATHWAY	0.0302	0.47	0.9165
559	TUMOR_SUPRESSOR	0.0087	0.47	0.9165
882	TAKEDA_NUP8_HOXA9_3D_UP	0.004	0.47	0.9165
1031	CARIES_PULP_HIGH_UP	0.0177	0.472	0.9165
1066	IFN_BETA_GLIOMA_DN	0.0329	0.472	0.9165
1114	NI2_LUNG_DN	0.0051	0.472	0.9165
1368	VHL_RCC_UP	0.0158	0.474	0.9165
984	ZHAN_MMPC_SIMAL	0.0123	0.474	0.9165
1123	DAC_FIBRO_UP	0.0139	0.476	0.9165
1574	UVC_HIGH_D5_DN	0.024	0.476	0.9165
894	PARK_RARALPHA_UP	0.0141	0.476	0.9165
916	LIAN_MYELOID_DIFF_RECEPTORS	0.0184	0.476	0.9165
1396	PRMT5_KD_UP	0.0168	0.478	0.9165
556	GPCRPATHWAY	0.0108	0.478	0.9165
1378	CMV_ALL_UP	0.0251	0.48	0.9165
1463	DSRNA_UP	0.0057	0.48	0.9165
256	BASSO_REGULATORY_HUBS	0.0312	0.48	0.9165
295	INTEGRINPATHWAY	0.0126	0.48	0.9165
27	IGF1MTORPATHWAY	0.021	0.482	0.9165
421	ZUCCHI_EPITHELIAL_DN	0.0054	0.482	0.9165
509	ONE_CARBON_POOL_BY_FOLATE	0.0305	0.482	0.9165
671	ATRBRCAPATHWAY	0.0474	0.482	0.9165
807	ZHAN_MULTIPLE_MYELOMA_VS_NORMAL_UP	0.0095	0.482	0.9165
407	ASTIER_BCELL	0.0012	0.484	0.9165
438	PENG_GLUCOSE_DN	0.0075	0.484	0.9165
641	TIDPATHWAY	0.0174	0.484	0.9165
542	ST_GA12_PATHWAY	0.0194	0.486	0.9165
728	CROONQUIST_IL6_RAS_DN	0.0292	0.488	0.9165
654	GOLDRATH_HP	0.0144	0.49	0.9165
34	MCALPAINPATHWAY	0.0158	0.492	0.9165
196	GLUCONEOGENESIS	0.0124	0.494	0.9165
388	GLYCOLYSIS	0.0124	0.494	0.9165
74	CCR3PATHWAY	0.0054	0.494	0.9165
788	KNUDSEN_PMNS_DN	0.0111	0.494	0.9165
986	FLOTHO_CASP8AP2_MRD_DIFF	0.0032	0.494	0.9165
228	CHAUHAN_2ME2	0.0151	0.496	0.9165
1015	ABRAHAM_AL_VS_MM_DN	0.0019	0.498	0.9165
1306	HDACI_COLON_CLUSTER6	0.0126	0.498	0.9165
348	GLEEVECPATHWAY	0.0094	0.498	0.9165
1634	AGED_MOUSE_HYPOTH_DN	0.0096	0.502	0.9165
365	RACCYCDPATHWAY	0.0142	0.504	0.9165
519	CTLA4PATHWAY	0.0048	0.504	0.9165
770	VANTVEER_BREAST_OUTCOME_GOOD_VS_POOR_UP	0.0059	0.506	0.9165
1468	GAMMA-UV_FIBRO_UP	0.0034	0.51	0.9165
190	WIELAND_HEPATITIS_B_INDUCED	0.0174	0.512	0.9165
568	PENG_LEUCINE_DN	0.0042	0.512	0.9165
777	UBIQUITIN_MEDIATED_PROTEOLYSIS	0.0074	0.512	0.9165
840	LEE_TCELLS4_UP	0.0042	0.512	0.9165
261	HIFPATHWAY	0.0051	0.514	0.9165
299	PROTEASOME_DEGRADATION	0.0063	0.514	0.9165
374	OXIDATIVE_PHOSPHORYLATION	0.0038	0.52	0.9165
1054	CMV_24HRS_UP	0.0043	0.528	0.9165
62	DER_IFNB_UP	0.0038	0.532	0.9165
1339	O6BG_RESIST_MEDULLOBLASTOMA_DN	0.0068	0.54	0.9165
760	CASPASEPATHWAY	0.004	0.544	0.9165
1673	ERM_KO_SERTOLI_DN	-0.8116	0.004	1
180	PASSERINI_APOPTOSIS	-0.5404	0.006	1
611	PROSTAGLANDIN_SYNTHESIS_REGULATION	-0.6359	0.006	1
1007	TAKEDA_NUP8_HOXA9_6H_UP	-0.4357	0.008	1
821	NUMATA_G_CSF_DIFF	-0.3889	0.008	1
958	TAKEDA_NUP8_HOXA9_10D_DN	-0.3762	0.016	1
1595	HUMAN_TISSUE_THYMUS	-0.5574	0.018	1
195	CROONQUIST_IL6_RAS_UP	-0.4267	0.02	1
1607	RIBAVIRIN_RSV_DN	-0.2451	0.022	1
1564	LH_GRANULOSA_UP	-0.2196	0.024	1
1597	BCNU_GLIOMA_NOMGMT_24HRS_UP	-0.5136	0.026	1
504	BRENTANI_TRANSPORT_OF_VESICLES	-0.3734	0.026	1
1239	HSC_LATEPROGENITORS_FETAL	-0.1698	0.028	1
1289	GH_EXOGENOUS_EARLY_UP	-0.4713	0.028	1
1430	FSH_GRANULOSA_UP	-0.2145	0.028	1
1662	GAMMA_ESR_OLD_UNREG	-0.3381	0.028	1
1131	ESR_FIBROBLAST_DN	-0.447	0.03	1
1382	MAMMARY_DEV_UP	-0.3891	0.03	1
1095	HDACI_COLON_CUR_DN	-0.2536	0.032	1
1510	AGEING_LYMPH_DN	-0.6596	0.034	1
1577	HUMAN_TISSUE_KIDNEY	-0.8311	0.034	1
1039	AGED_MOUSE_HIPPOCAMPUS_MULTI_UP	-0.3998	0.036	1
1064	HSC_LATEPROGENITORS_SHARED	-0.1701	0.038	1
1361	HSC_LATEPROGENITORS_ADULT	-0.1643	0.038	1
1423	UVC_HIGH_D6_DN	-0.4084	0.04	1
1431	LAL_KO_6MO_UP	-0.3899	0.04	1
1554	HDACI_COLON_TSA_DN	-0.3329	0.04	1
1655	LAL_KO_3MO_UP	-0.4578	0.04	1
1546	ZMPSTE24_KO_DN	-0.4001	0.042	1
455	JISON_SICKLE_CELL	-0.3615	0.042	1
82	IL12PATHWAY	-0.4183	0.044	1
1472	GN_CAMP_GRANULOSA_UP	-0.191	0.046	1
272	MAGRANGEAS_MULTIPLE_MYELOMA_IGL_VS_IGK_DN	-0.3089	0.046	1
342	KREBS_TCA_CYCLE	-0.3339	0.046	1
1665	PITUITARY_FETAL_UP	-0.4616	0.048	1
398	ST_MYOCYTE_AD_PATHWAY	-0.3054	0.048	1
922	MENSE_HYPOXIA_TRANSPORTER_GENES	-0.2324	0.048	1
567	FATTY_ACID_SYNTHESIS	-0.4546	0.05	1
1185	HYPOPHYSECTOMY_RAT_DN	-0.2735	0.052	1
753	TH1TH2PATHWAY	-0.5224	0.052	1
1238	AGED_MOUSE_HIPPOCAMPUS_ANY_UP	-0.2168	0.054	1
1362	UVC_HIGH_D3_DN	-0.33	0.054	1
1459	4NQO_ESR_WS_UNREG	-0.1955	0.054	1
1046	AGEING_KIDNEY_DN	-0.2547	0.056	1
112	FATTY_ACID_METABOLISM	-0.188	0.056	1
1526	BRACX_UP	-0.5837	0.056	1
1627	FSH_OVARY_MCV152_DN	-0.2882	0.056	1
418	TOB1PATHWAY	-0.4271	0.056	1
874	TAKEDA_NUP8_HOXA9_3D_DN	-0.4064	0.056	1
497	ROSS_CBF_MYH	-0.3933	0.058	1
1273	CPR_NULL_LIVER_UP	-0.2237	0.062	1
1141	UVC_HIGH_D2_DN	-0.3507	0.066	1
627	GOLDRATH_CELLCYCLE	-0.5406	0.066	1
789	TAKEDA_NUP8_HOXA9_8D_DN	-0.26	0.066	1
1090	TPA_RESIST_EARLY_UP	-0.2309	0.068	1
103	GPCRS_CLASS_A_RHODOPSIN_LIKE	-0.456	0.072	1
964	NEMETH_TNF_DN	-0.3828	0.072	1
1202	AGEING_KIDNEY_SPECIFIC_DN	-0.2461	0.078	1
1154	CMV_HCMV_TIMECOURSE_12HRS_DN	-0.3433	0.08	1
1367	CMV-CHX_HCMV_6HRS_DN	-0.4384	0.08	1
881	NADLER_OBESITY_HYPERGLYCEMIA	-0.2022	0.08	1
400	GPCRDB_CLASS_C_METABOTROPIC_GLUTAMATE_PHEROMONE	-0.7101	0.082	1
726	CHREBPPATHWAY	-0.4087	0.082	1
1532	UVC_XPCS_4HR_DN	-0.2339	0.084	1
5	CACAMPATHWAY	-0.3146	0.084	1
102	HSP27PATHWAY	-0.3449	0.088	1
545	HADDAD_HSC_CD7_UP	-0.2413	0.088	1
925	HADDAD_CD45CD7_PLUS_VS_MINUS_UP	-0.2413	0.088	1
1091	HDACI_COLON_TSA48HRS_UP	-0.2318	0.09	1
1146	BRCA1_MES_UP	-0.2113	0.09	1
250	PEART_HISTONE_UP	-0.2484	0.09	1
1048	UV-CMV_UNIQUE_HCMV_6HRS_DN	-0.1675	0.092	1
1124	CMV_HCMV_TIMECOURSE_10HRS_DN	-0.3156	0.092	1
848	LINDSTEDT_DEND_8H_VS_48H_UP	-0.3046	0.092	1
899	MENSE_HYPOXIA_UP	-0.1936	0.092	1
994	LI_FETAL_VS_WT_KIDNEY_UP	-0.1522	0.096	1
1437	PDGF_ES_UP	-0.2596	0.104	1
1683	OXSTRESS_BREASTCA_UP	-0.2482	0.106	1
691	CELL_ADHESION_RECEPTOR_ACTIVITY	-0.2734	0.108	1
118	KENNY_WNT_DN	-0.1653	0.11	1
222	BREAST_DUCTAL_CARCINOMA_GENES	-0.687	0.11	1
706	KENNY_WNT_UP	-0.2028	0.11	1
772	BRENTANI_DEATH	-0.136	0.11	1
913	VERNELL_PRB_CLSTR1	-0.361	0.11	1
1115	UVC_TTD_ALL_DN	-0.1754	0.112	1
1281	HDACI_COLON_SUL30MIN_DN	-0.3387	0.112	1
540	DAVIES_N	-0.2816	0.112	1
713	ZHAN_TONSIL_BONEMARROW	-0.1704	0.112	1
1096	CMV-UV_HCMV_6HRS_DN	-0.1175	0.114	1
1261	HDACI_COLON_SUL16HRS_UP	-0.1489	0.116	1
164	AGUIRRE_PANCREAS_CHR8	-0.1903	0.116	1
797	LEE_TCELLS10_UP	-0.1485	0.116	1
834	LEE_TCELLS8_UP	-0.1485	0.116	1
873	LEE_TCELLS1_UP	-0.1485	0.116	1
1235	AGED_MOUSE_RETINA_ANY_DN	-0.1903	0.118	1
812	WANG_HOXA9_VS_MEIS1_DN	-0.2692	0.118	1
610	BLYMPHOCYTEPATHWAY	-0.3832	0.12	1
966	YU_CMYC_UP	-0.6606	0.12	1
107	CK1PATHWAY	-0.2973	0.122	1
952	NAKAJIMA_MCSMBP_EOS	-0.4755	0.124	1
424	ELECTRON_TRANSPORT	-0.2018	0.128	1
826	BASSO_HCL_DIFF	-0.212	0.128	1
1101	CPR_NULL-LOW_LIVER_UP	-0.2337	0.13	1
1167	UVC_TTD-XPCS_COMMON_DN	-0.1479	0.13	1
1171	HDACI_COLON_BUT12HRS_UP	-0.163	0.13	1
384	HDACPATHWAY	-0.213	0.13	1
1371	AS3_FIBRO_C4	-0.2717	0.132	1
1500	OLDONLY_FIBRO_DN	-0.1429	0.132	1
1576	HPV31_UP	-0.1774	0.132	1
75	ST_PHOSPHOINOSITIDE_3_KINASE_PATHWAY	-0.2813	0.132	1
919	GUO_HEX_UP	-0.127	0.132	1
1635	HUMAN_TISSUE_LIVER	-0.3817	0.134	1
33	PEPTIDE_GPCRS	-0.4115	0.134	1
868	LINDSTEDT_DEND_DN	-0.19	0.134	1
1047	BCRABL_HL60_AFFY_UP	-0.2756	0.138	1
1156	HDACI_COLON_TSABUT_DN	-0.3347	0.138	1
1677	CMV_HCMV_TIMECOURSE_6HRS_DN	-0.2447	0.138	1
617	GLYCEROPHOSPHOLIPID_METABOLISM	-0.1632	0.14	1
664	PASSERINI_GROWTH	-0.3526	0.142	1
866	APPEL_IMATINIB_UP	-0.2798	0.142	1
304	SHHPATHWAY	-0.2767	0.144	1
309	GOLDRATH_CYTOLYTIC	-0.3403	0.144	1
495	SMALL_LIGAND_GPCRS	-0.3917	0.144	1
1149	UVB_SCC_DN	-0.1375	0.146	1
1624	P21_P53_MIDDLE_DN	-0.3431	0.146	1
477	ACTINYPATHWAY	-0.2173	0.146	1
562	DCPATHWAY	-0.282	0.146	1
105	TALL1PATHWAY	-0.3826	0.148	1
1100	TPA_SKIN_UP	-0.2068	0.148	1
1482	HDACI_COLON_BUT30MIN_DN	-0.236	0.148	1
456	SHIPP_FL_VS_DLBCL_UP	-0.2362	0.148	1
934	KNUDSEN_PMNS_UP	-0.1518	0.15	1
1079	ERM_KO_TESTES_DN	-0.3922	0.152	1
1092	UVC_TTD_4HR_DN	-0.1788	0.152	1
1536	IDX_TSA_UP_CLUSTER3	-0.294	0.152	1
417	BRENTANI_IMMUNE_FUNCTION	-0.1697	0.152	1
650	CELL_DEATH	-0.2793	0.152	1
364	SIG_CHEMOTAXIS	-0.2512	0.156	1
436	WELCSH_BRCA_UP	-0.1546	0.158	1
500	MITOCHONDRIAL_FATTY_ACID_BETAOXIDATION	-0.2991	0.158	1
1324	HTERT_UP	-0.2083	0.16	1
1602	CMV_HCMV_TIMECOURSE_16HRS_UP	-0.2254	0.16	1
314	LIZUKA_G2_GR_G3	-0.2408	0.16	1
1085	UVC_XPCS_ALL_DN	-0.1691	0.162	1
1230	P21_P53_ANY_DN	-0.3289	0.162	1
158	HYPERTROPHY_MODEL	-0.2839	0.162	1
1584	SERUM_FIBROBLAST_CELLCYCLE	-0.3249	0.162	1
1082	UVC_TTD_8HR_DN	-0.1155	0.164	1
1508	SARCOMAS_SCHWANNOMA_UP	-0.246	0.164	1
886	VERHAAK_AML_NPM1_MUT_VS_WT_UP	-0.2402	0.164	1
1025	BLEO_HUMAN_LYMPH_HIGH_4HRS_UP	-0.1822	0.166	1
1372	HDACI_COLON_CUR12HRS_UP	-0.2116	0.166	1
1480	CPR_LOW_LIVER_UP	-0.1842	0.166	1
68	DISTECHE_XINACTIVATED_GENES	-0.2619	0.168	1
660	ROSS_MLL_FUSION	-0.1418	0.17	1
76	INSULINPATHWAY	-0.2392	0.17	1
1427	HDACI_COLON_BUT48HRS_DN	-0.1617	0.172	1
820	GALE_FLT3ANDAPL_UP	-0.2682	0.172	1
929	ZHAN_MMPC_SIM	-0.139	0.172	1
1199	GAMMA_UNIQUE_FIBRO_DN	-0.2119	0.174	1
1050	WERNERONLY_FIBRO_DN	-0.1163	0.176	1
1442	GH_GHRHR_KO_6HRS_UP	-0.1384	0.176	1
692	ST_G_ALPHA_S_PATHWAY	-0.3104	0.176	1
1271	UVC_XPCS_8HR_DN	-0.1599	0.178	1
363	CCR5PATHWAY	-0.1843	0.178	1
944	STAEGE_EFTS_UP	-0.1983	0.178	1
1060	COCAINE_BRAIN_4WKS_UP	-0.1341	0.18	1
1501	GAMMA_ESR_WS_UNREG	-0.12	0.18	1
1160	CREB_BRAIN_8WKS_DN	-0.1209	0.182	1
1432	HSC_MATURE_ADULT	-0.0966	0.182	1
1613	UVB_NHEK4_6HRS_UP	-0.1668	0.182	1
60	GPCRDB_CLASS_A_RHODOPSIN_LIKE	-0.3218	0.182	1
1679	MMS_MOUSE_LYMPH_HIGH_4HRS_UP	-0.2668	0.184	1
1138	UV-CMV_UNIQUE_HCMV_6HRS_UP	-0.1238	0.186	1
876	SANSOM_APC_LOSS4_UP	-0.1169	0.186	1
97	CHESLER_BRAIN_CIS_GENES	-0.147	0.188	1
1464	BCNU_GLIOMA_NOMGMT_48HRS_UP	-0.1946	0.19	1
1061	MMS_MOUSE_LYMPH_HIGH_24HRS_UP	-0.2387	0.192	1
1414	TPA_RESIST_LATE_UP	-0.1056	0.192	1
1550	HSC_EARLYPROGENITORS_ADULT	-0.1245	0.192	1
386	CELL_SURFACE_RECEPTOR_LINKED_SIGNAL_TRANSDUCTION	-0.1415	0.192	1
752	STURLA_SONIC_HEDGEHOG	-0.1947	0.192	1
1155	AGED_MOUSE_CORTEX_UP	-0.2327	0.194	1
330	RADIATION_SENSITIVITY	-0.1377	0.194	1
130	SHIPP_FL_VS_DLBCL_DN	-0.2375	0.196	1
1446	IFNALPHA_RESIST_DN	-0.162	0.196	1
847	MARCINIAK_CHOP_DIFF	-0.2074	0.196	1
921	HANSON_NFKAPPB_IND	-0.3395	0.196	1
1572	CMV_HCMV_TIMECOURSE_ALL_UP	-0.0855	0.2	1
993	TAKEDA_NUP8_HOXA9_16D_DN	-0.1309	0.2	1
1150	HSC_EARLYPROGENITORS_FETAL	-0.1176	0.202	1
1313	HSC_EARLYPROGENITORS_SHARED	-0.1176	0.202	1
879	NOUZOVA_CPG_METHLTD	-0.1733	0.202	1
912	GREENBAUM_E2A_UP	-0.1928	0.202	1
335	POMEROY_MD_TREATMENT_GOOD_VS_POOR_DN	-0.1613	0.204	1
917	YAGI_AML_PROG_ASSOC	-0.0783	0.204	1
409	AGUIRRE_PANCREAS_CHR18	-0.1854	0.206	1
433	ICHIBA_GVHD	-0.0996	0.206	1
850	HOHENKIRK_MONOCYTE_DEND_UP	-0.0822	0.206	1
1286	AGEING_KIDNEY_UP	-0.0818	0.208	1
599	LEE_MYC_UP	-0.1097	0.208	1
321	GLUTATHIONE_METABOLISM	-0.1766	0.214	1
688	ALANINE_AND_ASPARTATE_METABOLISM	-0.1411	0.214	1
738	MARSHALL_SPLEEN_BAL	-0.1557	0.214	1
928	FALT_BCLL_IG_MUTATED_VS_WT_UP	-0.1688	0.214	1
1548	ADIP_DIFF_CLUSTER5	-0.1802	0.216	1
1449	H2O2_CSBDIFF_C2	-0.167	0.218	1
1486	BLEO_MOUSE_LYMPH_HIGH_24HRS_DN	-0.1969	0.218	1
767	COLLER_MYC_UP	-0.1843	0.218	1
1157	UVB_NHEK1_DN	-0.1234	0.22	1
1308	UVC_HIGH_ALL_DN	-0.11	0.22	1
339	GAMMA_HEXACHLOROCYCLOHEXANE_DEGRADATION	-0.3391	0.22	1
612	SMITH_HTERT_DN	-0.0928	0.22	1
7	SIG_PIP3_SIGNALING_IN_B_LYMPHOCYTES	-0.1891	0.22	1
25	GLYCINE_SERINE_AND_THREONINE_METABOLISM	-0.1456	0.222	1
311	PASSERINI_INFLAMMATION	-0.1878	0.222	1
430	PASSERINI_SIGNAL	-0.0753	0.222	1
818	ZHAN_MM_CD138_HP_VS_REST	-0.1748	0.222	1
284	LEE_CIP_DN	-0.1581	0.224	1
586	SALMONELLAPATHWAY	-0.1982	0.224	1
856	HOHENKIRK_MONOCYTE_DEND_DN	-0.1505	0.226	1
67	FLECHNER_KIDNEY_TRANSPLANT_WELL_PBL_DN	-0.2155	0.228	1
122	HISTIDINE_METABOLISM	-0.2199	0.23	1
1686	BRG1_ALAB_DN	-0.134	0.23	1
808	HASLINGER_B_CLL_12	-0.3085	0.23	1
1125	HBX_NL_DN	-0.1779	0.232	1
1003	CROMER_HYPOPHARYNGEAL_MET_VS_NON_UP	-0.0894	0.234	1
1086	DIAB_NEPH_DN	-0.0722	0.234	1
1542	ADIP_VS_PREADIP_DN	-0.1102	0.234	1
1568	BREASTCA_TWO_CLASSES	-0.0984	0.234	1
345	CALCINEURINPATHWAY	-0.1923	0.234	1
745	NO2IL12PATHWAY	-0.206	0.234	1
898	ZHAN_MM_CD138_PR_VS_REST	-0.2247	0.234	1
942	SCHURINGA_STAT5A_DN	-0.2059	0.234	1
382	TARTE_PC	-0.207	0.236	1
594	TRYPTOPHAN_METABOLISM	-0.1484	0.236	1
121	KUROKAWA_5FU_IFN_SENSITIVE_VS_RESISTANT_DN	-0.1226	0.238	1
1392	CARIES_PULP_UP	-0.1017	0.238	1
1062	IDX_TSA_UP_CLUSTER6	-0.0746	0.24	1
466	KANNAN_P53_DN	-0.1422	0.24	1
932	LI_FETAL_VS_WT_KIDNEY_DN	-0.1642	0.24	1
281	INSULIN_SIGNALING	-0.1408	0.242	1
1285	HDACI_COLON_BUT_DN	-0.0815	0.246	1
147	PGC1APATHWAY	-0.142	0.246	1
315	LIZUKA_L0_SM_L1	-0.2112	0.248	1
853	PARK_RARALPHA_MOD	-0.1263	0.248	1
1647	IFN_ALPHA_UP	-0.1499	0.25	1
828	ZHAN_MM_CD1_VS_CD2_DN	-0.094	0.25	1
1129	SARCOMAS_LEIOMYOSARCOMA_CALP_UP	-0.1488	0.252	1
410	PASSERINI_TRANSCRIPTION	-0.1073	0.252	1
50	FLECHNER_KIDNEY_TRANSPLANT_REJECTION_UP	-0.1407	0.252	1
780	FATTY_ACID_DEGRADATION	-0.1791	0.252	1
875	ZHAN_MMPC_EARLYVS	-0.1194	0.252	1
891	LEE_TCELLS3_UP	-0.1527	0.252	1
1484	BAF57_BT549_DN	-0.079	0.254	1
20	GLYCEROLIPID_METABOLISM	-0.1186	0.254	1
21	LE_MYELIN_UP	-0.1003	0.254	1
390	GLYCOGEN_METABOLISM	-0.0627	0.254	1
800	ROTH_HTERT_DIFF	-0.1312	0.254	1
1029	GH_EXOGENOUS_ALL_UP	-0.1554	0.256	1
326	CELL_MOTILITY	-0.1447	0.256	1
835	WANG_HOXA9_VS_MEIS1_UP	-0.1313	0.256	1
1014	GAY_YY1_DN	-0.0877	0.258	1
1260	CMV_HCMV_TIMECOURSE_48HRS_UP	-0.1145	0.258	1
1466	NOVA2_KO_SPLICING	-0.178	0.258	1
375	VIPPATHWAY	-0.1795	0.26	1
378	HINATA_NFKB_UP	-0.0962	0.26	1
467	MATRIX_METALLOPROTEINASES	-0.2611	0.26	1
1399	DOX_RESIST_GASTRIC_UP	-0.2002	0.262	1
1435	AGED_RHESUS_DN	-0.0882	0.262	1
1471	UV-4NQO_FIBRO_DN	-0.0919	0.262	1
402	STANELLE_E2F1_UP	-0.1643	0.262	1
1139	DSRNA_DN	-0.1299	0.264	1
1248	ET743_SARCOMA_24HRS_DN	-0.1915	0.264	1
1678	GH_GHRHR_KO_24HRS_UP	-0.1129	0.264	1
292	RASPATHWAY	-0.1611	0.264	1
1256	HYPOXIA_RCC_NOVHL_UP	-0.1015	0.266	1
926	NGUYEN_KERATO_UP	-0.1116	0.266	1
72	SPRYPATHWAY	-0.1945	0.268	1
1496	UVC_HIGH_D1_DN	-0.1622	0.27	1
194	TCA	-0.1761	0.27	1
652	UREA_CYCLE_AND_METABOLISM_OF_AMINO_GROUPS	-0.1512	0.272	1
160	O_GLYCAN_BIOSYNTHESIS	-0.1903	0.274	1
1620	IRS_KO_ADIP_UP	-0.1629	0.274	1
798	LINDSTEDT_DEND_UP	-0.1098	0.274	1
831	RUTELLA_HEPATGFSNDCS_UP	-0.1091	0.274	1
978	FALT_BCLL_DN	-0.1604	0.276	1
1258	CMV-UV_HCMV_6HRS_UP	-0.0653	0.278	1
1626	BLEO_MOUSE_LYMPH_LOW_24HRS_DN	-0.1586	0.278	1
305	ASTON_DEPRESSION_UP	-0.0839	0.278	1
307	CYTOKINEPATHWAY	-0.2518	0.278	1
1117	CMV_HCMV_TIMECOURSE_48HRS_DN	-0.1215	0.28	1
437	LEE_ACOX1_DN	-0.1273	0.28	1
1386	STRESS_ARSENIC_SPECIFIC_UP	-0.05	0.282	1
715	GOLDRATH_MEMORY	-0.0811	0.282	1
32	PHENYLALANINE_METABOLISM	-0.1926	0.284	1
14	ROME_INSULIN_2F_UP	-0.1034	0.286	1
217	MAPK_CASCADE	-0.1814	0.286	1
259	TOLLPATHWAY	-0.1464	0.286	1
943	HOFFMANN_BIVSBII_BI_TABLE2	-0.0458	0.286	1
1615	HDACI_COLON_SUL_DN	-0.0557	0.288	1
408	FLECHNER_KIDNEY_TRANSPLANT_WELL_PBL_UP	-0.094	0.288	1
459	CROONQUIST_IL6_STARVE_UP	-0.1569	0.288	1
138	ST_DIFFERENTIATION_PATHWAY_IN_PC12_CELLS	-0.0913	0.29	1
1415	REOVIRUS_HEK293_UP	-0.0983	0.29	1
1485	IDX_TSA_DN_CLUSTER1	-0.0892	0.29	1
1483	UVB_SCC_UP	-0.1129	0.292	1
501	GPCRDB_OTHER	-0.1662	0.292	1
673	NDKDYNAMINPATHWAY	-0.1317	0.292	1
1128	HBX_HCC_DN	-0.1684	0.294	1
1158	GH_GHRHR_KO_6HRS_DN	-0.1431	0.294	1
336	PYK2PATHWAY	-0.1284	0.294	1
1204	MYOD_NIH3T3_DN	-0.0691	0.296	1
1264	ET743_SARCOMA_48HRS_DN	-0.1438	0.296	1
508	CHESLER_HIGHEST_FOLD_RANGE_GENES	-0.109	0.296	1
721	GHPATHWAY	-0.1426	0.296	1
823	LIAN_MYELOID_DIFF_GRANULE	-0.1464	0.296	1
1393	GENOTOXINS_ALL_4HRS_REG	-0.1429	0.298	1
1225	TGFBETA_C1_UP	-0.1577	0.3	1
86	BUTANOATE_METABOLISM	-0.0761	0.3	1
564	BETA_ALANINE_METABOLISM	-0.0971	0.302	1
803	YU_CMYC_DN	-0.0864	0.302	1
1240	ET743_HELA_DN	-0.1133	0.304	1
263	TGFBPATHWAY	-0.1364	0.304	1
249	IL2RBPATHWAY	-0.129	0.306	1
90	ARGININE_AND_PROLINE_METABOLISM	-0.0696	0.306	1
954	TAVOR_CEBP_UP	-0.1128	0.306	1
971	HOFMANN_MDS_CD34_LOW_RISK	-0.0738	0.306	1
1043	BRCA2_BRCA1_DN	-0.0904	0.308	1
1208	CALRES_RHESUS_DN	-0.0653	0.308	1
1560	STEMCELL_COMMON_UP	-0.1129	0.308	1
490	FCER1PATHWAY	-0.1397	0.308	1
573	ST_GRANULE_CELL_SURVIVAL_PATHWAY	-0.0959	0.308	1
372	RHOPATHWAY	-0.0932	0.31	1
1353	UV_ESR_OLD_UNREG	-0.0745	0.312	1
1632	HEMATOP_STEM_ALL_UP	-0.1101	0.312	1
215	APOPTOSIS_KEGG	-0.0728	0.312	1
1295	CMV_IE86_UP	-0.1324	0.316	1
145	MPRPATHWAY	-0.1085	0.316	1
1498	ET743_SARCOMA_DN	-0.1035	0.316	1
474	PENG_GLUCOSE_UP	-0.0697	0.316	1
1309	CORTEX_ENRICHMENT_LATE_UP	-0.1578	0.318	1
473	NFKBPATHWAY	-0.1346	0.318	1
739	BRENTANI_PROTEIN_MODIFICATION	-0.0658	0.324	1
1218	UVB_NHEK3_ALL	-0.0399	0.326	1
1619	MIDDLEAGE_UP	-0.2107	0.326	1
809	MOREAUX_TACI_HI_IN_PPC_UP	-0.1425	0.326	1
1504	TNFALPHA_ALL_UP	-0.0451	0.328	1
199	TNFR2PATHWAY	-0.1615	0.328	1
1633	UVC_HIGH_ALL_UP	-0.104	0.33	1
236	EIF4PATHWAY	-0.0978	0.33	1
427	NTHIPATHWAY	-0.1373	0.33	1
485	CELL_CYCLE_CHECKPOINT	-0.1094	0.33	1
1173	HDACI_COLON_BUT16HRS_DN	-0.0713	0.332	1
1347	ET743_SARCOMA_72HRS_DN	-0.0933	0.332	1
53	NOS1PATHWAY	-0.0784	0.332	1
624	ARAPPATHWAY	-0.0852	0.332	1
1008	SASAKI_ATL_UP	-0.0543	0.334	1
35	SASAKI_TCELL_LYMPHOMA_VS_CD4_UP	-0.0543	0.334	1
48	PURINE_METABOLISM	-0.0546	0.334	1
1603	GH_EXOGENOUS_ANY_UP	-0.0865	0.336	1
449	NKTPATHWAY	-0.1019	0.336	1
1130	UVB_NHEK4_24HRS_DN	-0.1347	0.34	1
1178	INOS_ALL_UP	-0.0908	0.34	1
207	CARDIACEGFPATHWAY	-0.1068	0.34	1
270	SANA_IFNG_ENDOTHELIAL_DN	-0.0537	0.34	1
1681	VHL_NORMAL_UP	-0.0389	0.342	1
300	PGC	-0.0382	0.342	1
665	41BBPATHWAY	-0.0962	0.342	1
88	GCRPATHWAY	-0.1152	0.342	1
1434	MMS_HUMAN_LYMPH_LOW_4HRS_DN	-0.1303	0.344	1
1668	HSC_INTERMEDIATEPROGENITORS_ADULT	-0.0428	0.344	1
1105	CMV_HCMV_TIMECOURSE_24HRS_UP	-0.0406	0.346	1
204	N_GLYCAN_BIOSYNTHESIS	-0.0663	0.346	1
273	PEART_HISTONE_DN	-0.028	0.346	1
310	WONG_IFNA_HCC_RESISTANT_VS_SENSITIVE_DN	-0.0398	0.346	1
328	SPPAPATHWAY	-0.1018	0.346	1
70	SMITH_HCV_INDUCED_HCC_UP	-0.0546	0.346	1
759	SIG_PIP3_SIGNALING_IN_CARDIAC_MYOCTES	-0.0747	0.346	1
1073	SERUM_FIBROBLAST_CORE_UP	-0.0503	0.35	1
411	MRNA_SPLICING	-0.1057	0.35	1
468	TRANSLATION_FACTORS	-0.0972	0.35	1
487	SCHUMACHER_MYC_UP	-0.071	0.35	1
902	XU_ATRA_UP	-0.1467	0.35	1
1666	ADIP_VS_FIBRO_DN	-0.0509	0.352	1
46	MAGRANGEAS_MULTIPLE_MYELOMA_IGG_VS_IGA_DN	-0.1132	0.352	1
530	MAGRANGEAS_MULTIPLE_MYELOMA_IGG_VS_IGA_UP	-0.1132	0.352	1
603	MITOCHONDRIAPATHWAY	-0.0737	0.352	1
63	BCRPATHWAY	-0.08	0.352	1
637	RELAPATHWAY	-0.1115	0.352	1
829	MOREAUX_TACI_HI_VS_LOW_DN	-0.1028	0.352	1
852	HASLINGER_B_CLL_11Q23	-0.097	0.352	1
157	IL1RPATHWAY	-0.1013	0.354	1
579	ZHAN_TONSIL_PCBC	-0.0472	0.354	1
1228	UVB_NHEK1_C6	-0.0575	0.358	1
1618	DFOSB_BRAIN_2WKS_UP	-0.0489	0.358	1
529	TNFR1PATHWAY	-0.0883	0.358	1
560	DORSAM_HOXA9_UP	-0.0718	0.358	1
478	SHIPP_DLBCL_CURED_DN	-0.0876	0.36	1
806	HSIAO_LIVER_SPECIFIC_GENES	-0.0969	0.362	1
1142	ADIPOGENESIS_HMSC_CLASS8_DN	-0.0967	0.364	1
1194	IDX_TSA_UP_CLUSTER5	-0.0393	0.364	1
435	ARENRF2PATHWAY	-0.0789	0.364	1
57	FLECHNER_KIDNEY_TRANSPLANT_REJECTION_PBL_UP	-0.0515	0.364	1
171	PYRUVATE_METABOLISM	-0.0576	0.366	1
1033	HDACI_COLON_BUT24HRS_UP	-0.0261	0.368	1
210	LOTEM_LEUKEMIA_UP	-0.0872	0.368	1
79	TNF_AND_FAS_NETWORK	-0.0702	0.368	1
1266	NF90_UP	-0.0985	0.37	1
1312	HDACI_COLON_CUR48HRS_UP	-0.0256	0.37	1
220	CDC42RACPATHWAY	-0.0974	0.37	1
248	FERNANDEZ_MYC_TARGETS	-0.0135	0.37	1
37	AGPCRPATHWAY	-0.1217	0.37	1
896	BASSO_GERMINAL_CENTER_CD40_UP	-0.0416	0.37	1
1212	HDACI_COLON_BUT24HRS_DN	-0.0201	0.372	1
1334	AGED_MOUSE_RETINA_ANY_UP	-0.0615	0.372	1
1481	BRCA_PROGNOSIS_POS	-0.0372	0.372	1
1580	MIDDLEAGE_DN	-0.1275	0.372	1
1311	UVC_HIGH_D8_DN	-0.0575	0.374	1
133	ST_T_CELL_SIGNAL_TRANSDUCTION	-0.0445	0.374	1
1404	HDACI_COLON_BUT48HRS_UP	-0.0295	0.374	1
1322	ADIP_HUMAN_UP	-0.0842	0.378	1
141	AMINOACYL_TRNA_BIOSYNTHESIS	-0.0861	0.378	1
962	ZHAN_MM_MOLECULAR_CLASSI_DN	-0.0513	0.378	1
1012	CHEN_HOXA5_TARGETS_UP	-0.0756	0.38	1
1040	BRCA1_SW480_UP	-0.0403	0.38	1
229	PENG_GLUTAMINE_DN	-0.035	0.38	1
334	DAVIES_MGUS_MM	-0.0757	0.38	1
119	LEE_E2F1_UP	-0.0764	0.382	1
1552	UVB_NHEK2_DN	-0.0342	0.382	1
366	EGF_RECEPTOR_SIGNALING_PATHWAY	-0.1265	0.382	1
999	RAY_P210_DIFF	-0.0436	0.382	1
1166	P53GENES_ALL	-0.0466	0.384	1
132	ERKPATHWAY	-0.0724	0.384	1
1617	AD12_24HRS_DN	-0.053	0.384	1
1685	ZMPSTE24_KO_UP	-0.0985	0.384	1
203	ROSS_CBF_LEUKEMIA	-0.0532	0.384	1
668	SANA_TNFA_ENDOTHELIAL_UP	-0.0518	0.384	1
1120	AS3_FIBRO_UP	-0.0534	0.386	1
1215	AS3_FIBRO_C3	-0.0534	0.386	1
165	INFLAMPATHWAY	-0.0906	0.386	1
1081	CIS_XPC_DN	-0.0387	0.388	1
1327	OXSTRESS_RPETHREE_DN	-0.0979	0.388	1
522	KERATINOCYTEPATHWAY	-0.0654	0.39	1
758	SHEPARD_BMYB_MORPHOLINO_UP	-0.0193	0.39	1
903	FALT_BCLL_IG_MUTATED_VS_WT_DN	-0.0472	0.39	1
705	ZELLER_MYC_UP	-0.049	0.392	1
320	SANA_IFNG_ENDOTHELIAL_UP	-0.055	0.396	1
563	MAPKPATHWAY	-0.0797	0.396	1
234	BRENTANI_DNA_METHYLATION_AND_MODIFICATION	-0.0343	0.398	1
935	ZHAN_MMPC_LATEVS	-0.0276	0.398	1
100	TARTE_PLASMA_BLASTIC	-0.0289	0.4	1
1325	CALRES_MOUSE_DN	-0.0362	0.4	1
804	HESS_HOXAANMEIS1_UP	-0.0329	0.4	1
811	HESS_HOXAANMEIS1_DN	-0.0329	0.4	1
1358	BRCA_BRCA1_POS	-0.0141	0.402	1
949	TAKEDA_NUP8_HOXA9_16D_UP	-0.043	0.402	1
106	SA_CASPASE_CASCADE	-0.0384	0.404	1
1216	ALZHEIMERS_INCIPIENT_DN	-0.0241	0.404	1
1301	AGEING_BRAIN_DN	-0.0355	0.404	1
258	MEF2DPATHWAY	-0.0485	0.404	1
793	ADDYA_K562_HEMIN_TREATMENT	-0.0277	0.404	1
795	ZHAN_MULTIPLE_MYELOMA_SUBCLASSES_DIFF	-0.0436	0.404	1
1175	CANCER_UNDIFFERENTIATED_META_UP	-0.0342	0.406	1
527	FASPATHWAY	-0.0526	0.406	1
1078	AGEING_BRAIN_UP	-0.0486	0.408	1
131	GOLUB_ALL_VS_AML_UP	-0.0543	0.408	1
1514	CMV_HCMV_TIMECOURSE_18HRS_UP	-0.0497	0.408	1
613	DNA_REPLICATION_REACTOME	-0.0392	0.41	1
87	CBLPATHWAY	-0.0618	0.41	1
906	ASTIER_FN_DIFF	-0.0283	0.41	1
1087	ET743PT650_COLONCA_DN	-0.0248	0.412	1
189	GOLUB_ALL_VS_AML_DN	-0.0814	0.412	1
370	BILE_ACID_BIOSYNTHESIS	-0.0785	0.412	1
632	REN_E2F1_TARGETS	-0.0459	0.412	1
1162	AGED_RHESUS_UP	-0.0418	0.414	1
1168	AD12_ANY_DN	-0.0443	0.414	1
1451	HSC_INTERMEDIATEPROGENITORS_SHARED	-0.0184	0.414	1
71	HCMVPATHWAY	-0.0778	0.414	1
94	UBIQUINONE_BIOSYNTHESIS	-0.034	0.414	1
1030	BUT_TSA_UP	-0.0513	0.416	1
1272	UVB_NHEK3_C0	-0.035	0.416	1
472	FMLPPATHWAY	-0.0437	0.416	1
548	CELL_CYCLE	-0.0153	0.416	1
1511	DNMT1_KO_UP	-0.0247	0.42	1
1641	ADIPOGENESIS_HMSC_CLASS1_UP	-0.0535	0.42	1
159	METPATHWAY	-0.0416	0.422	1
1671	TFF2_KO_UP	-0.0206	0.422	1
805	NGUYEN_KERATO_DN	-0.027	0.422	1
1221	GH_GHRHR_KO_24HRS_DN	-0.0275	0.424	1
1278	POD1_KO_MOST_DN	-0.0475	0.424	1
162	SA_PTEN_PATHWAY	-0.0458	0.424	1
465	ST_G_ALPHA_I_PATHWAY	-0.0443	0.424	1
709	AGUIRRE_PANCREAS_CHR7	-0.0436	0.424	1
977	HOFMANN_MANTEL_LYMPHOMA_VS_LYMPH_NODES_UP	-0.0404	0.426	1
1044	HIPPOCAMPUS_DEVELOPMENT_POSTNATAL	-0.0333	0.428	1
1233	CALRES_MOUSE_NEOCORTEX_UP	-0.0219	0.428	1
1369	BRCA_PROGNOSIS_NEG	-0.0238	0.428	1
140	INTEGRIN_MEDIATED_CELL_ADHESION_KEGG	-0.029	0.428	1
1658	IL1_CORNEA_DN	-0.0473	0.428	1
642	GLYCOLYSIS_AND_GLUCONEOGENESIS	-0.0226	0.428	1
1335	HSC_MATURE_FETAL	-0.0201	0.43	1
1674	CALRES_MOUSE_NEOCORTEX_DN	-0.0127	0.43	1
1055	BCNU_GLIOMA_MGMT_24HRS_DN	-0.0675	0.432	1
135	PYRIMIDINE_METABOLISM	-0.01	0.432	1
1473	RCC_NL_UP	-0.0179	0.432	1
1527	BRCA1_OVEREXP_UP	-0.0242	0.432	1
3	MENSSEN_MYC_UP	-0.0321	0.432	1
1072	BCNU_GLIOMA_NOMGMT_48HRS_DN	-0.0276	0.434	1
1455	HBX_NL_UP	-0.0361	0.434	1
377	BCL2_FAMILY_AND_REG_NETWORK	-0.0307	0.434	1
996	HALMOS_CEBP_UP	-0.0342	0.434	1
114	CITRATE_CYCLE_TCA_CYCLE	-0.0212	0.436	1
128	PROSTAGLANDIN_AND_LEUKOTRIENE_METABOLISM	-0.0399	0.436	1
597	LIZUKA_G1_SM_G2	-0.0634	0.436	1
681	YAGI_AML_PROGNOSIS	-0.0178	0.436	1
1143	HBX_HCC_UP	-0.0277	0.438	1
29	SA_MMP_CYTOKINE_CONNECTION	-0.0437	0.438	1
704	CREBPATHWAY	-0.0428	0.438	1
824	HADDAD_HPCLYMPHO_ENRICHED	-0.0151	0.438	1
1213	TSA_CD4_DN	-0.0615	0.442	1
1452	HDACI_COLON_CLUSTER10	-0.022	0.442	1
380	BRENTANI_CELL_ADHESION	-0.04	0.442	1
394	AKTPATHWAY	-0.0411	0.442	1
434	CELL_CYCLE_KEGG	-0.0082	0.442	1
110	ELECTRON_TRANSPORT_CHAIN	-0.0309	0.444	1
1252	BLEO_HUMAN_LYMPH_HIGH_24HRS_UP	-0.0093	0.444	1
393	PENG_GLUTAMINE_UP	-0.0111	0.444	1
583	ST_FAS_SIGNALING_PATHWAY	-0.0119	0.444	1
771	TYROSINE_METABOLISM	-0.0749	0.446	1
700	ANDROGEN_GENES	-0.0172	0.448	1
869	ALCALAY_AML_NPMC_DN	-0.005	0.448	1
1176	AGED_MOUSE_HYPOTH_UP	-0.0242	0.45	1
18	BROCKE_IL6	-0.0186	0.45	1
23	ALKPATHWAY	-0.0359	0.45	1
239	VANTVEER_BREAST_OUTCOME_GOOD_VS_POOR_DN	-0.0211	0.45	1
792	KRETZSCHMAR_IL6_DIFF	-0.0186	0.45	1
260	KIM_TH_CELLS_UP	-0.0373	0.452	1
6	BRENTANI_CYTOSKELETON	-0.0515	0.452	1
833	LEE_TCELLS6_UP	-0.0251	0.452	1
1045	CPR_LOW_LIVER_DN	-0.0548	0.454	1
1605	AD12_32HRS_DN	-0.0228	0.454	1
369	TRNA_SYNTHETASES	-0.0413	0.454	1
1616	AGED_MOUSE_NEOCORTEX_DN	-0.0283	0.456	1
306	ST_WNT_CA2_CYCLIC_GMP_PATHWAY	-0.0434	0.456	1
425	BYSTROM_IL5_DN	-0.0153	0.456	1
796	XU_CBP_DN	-0.0119	0.456	1
1097	GENOTOXINS_24HRS_DISCR	-0.006	0.458	1
608	ST_INTEGRIN_SIGNALING_PATHWAY	-0.0058	0.458	1
838	PARK_MSCS_DIFF	-0.0098	0.458	1
167	BHATTACHARYA_ESC_UP	-0.0159	0.46	1
338	DER_IFNG_UP	-0.0083	0.46	1
591	GLYCOGEN	-0.0156	0.46	1
845	LIAN_MYELOID_DIFF_TF	-0.0402	0.46	1
890	PARK_MSCS_BOTH	-0.0189	0.46	1
1579	TNFALPHA_30MIN_UP	-0.0147	0.462	1
251	SIG_BCR_SIGNALING_PATHWAY	-0.0078	0.462	1
1315	HDACI_COLON_CLUSTER5	-0.0117	0.464	1
1592	HDACI_COLON_SUL16HRS_DN	-0.0352	0.464	1
535	CELL_CYCLE_ARREST	-0.0161	0.464	1
577	CIRCADIAN_EXERCISE	-0.0248	0.464	1
730	BRENTANI_TRANSCRIPTION_FACTORS	-0.0207	0.464	1
1080	LVAD_HEARTFAILURE_DN	-0.0433	0.466	1
153	EPOPATHWAY	-0.0394	0.466	1
218	PASSERINI_PROLIFERATION	-0.0227	0.468	1
961	IGLESIAS_E2FMINUS_DN	-0.0182	0.468	1
1477	STRESS_IONIZING_SPECIFIC_UP	-0.0389	0.47	1
404	ATMPATHWAY	-0.022	0.47	1
779	ST_INTERLEUKIN_4_PATHWAY	-0.0216	0.47	1
901	SANSOM_APC_5_DN	-0.0191	0.47	1
351	SIG_IL4RECEPTOR_IN_B_LYPHOCYTES	-0.0286	0.472	1
368	ST_TUMOR_NECROSIS_FACTOR_PATHWAY	-0.0128	0.472	1
920	NOUZOVA_CPG_H4_UP	-0.0055	0.472	1
214	GLYCOSPHINGOLIPID_METABOLISM	-0.0257	0.474	1
1598	BRCA1_SW480_DN	-0.0165	0.476	1
769	BIOPEPTIDESPATHWAY	-0.0193	0.476	1
723	TPOPATHWAY	-0.001	0.478	1
967	NAKAJIMA_MCS_UP	-0.032	0.478	1
778	NELSON_ANDROGEN_UP	-0.0204	0.48	1
714	CELL2CELLPATHWAY	-0.009	0.482	1
1424	CMV_HCMV_TIMECOURSE_20HRS_UP	-0.0234	0.484	1
226	HUMAN_CD34_ENRICHED_TRANSCRIPTION_FACTORS	-0.0105	0.484	1
791	ZHAN_MM_CD1_VS_CD2_UP	-0.0223	0.484	1
930	IRITANI_ADPROX_LYMPH	-0.0095	0.484	1
1492	AGED_MOUSE_MUSCLE_DN	-0.0115	0.486	1
1493	IDX_TSA_DN_CLUSTER6	-0.0158	0.486	1
1032	UVB_NHEK1_C1	-0.0043	0.488	1
717	ROSS_AML1_ETO	-0.003	0.488	1
893	VERNELL_PRB_CLSTR2	-0.0371	0.488	1
514	ABRAHAM_MM_VS_AL_UP	-0.0048	0.49	1
58	KANNAN_P53_UP	-0.01	0.49	1
1093	OXSTRESS_RPETWO_DN	-0.0024	0.492	1
454	ROSS_CBF	-0.0148	0.492	1
593	UCALPAINPATHWAY	-0.0142	0.492	1
649	PITX2PATHWAY	-0.0096	0.492	1
683	STARCH_AND_SUCROSE_METABOLISM	-0.0043	0.492	1
267	STRESSPATHWAY	-0.0008	0.494	1
878	CHIARETTI_ZAP70_DIFF	-0.0029	0.494	1
108	SHEPARD_NEG_REG_OF_CELL_PROLIFERATION	-0.0026	0.496	1
633	BRENTANI_SIGNALING	-0.0048	0.496	1
1357	HSC_MATURE_SHARED	-0.0023	0.498	1
355	CROONQUIST_RAS_STROMA_UP	-0.0227	0.498	1
1596	ALZHEIMERS_INCIPIENT_UP	-0.0082	0.506	1
697	TCYTOTOXICPATHWAY	-0.0167	0.506	1
825	HOGERKORP_CD44_UP	-0.0241	0.506	1
252	MTORPATHWAY	-0.0022	0.508	1
580	EICOSANOID_SYNTHESIS	-0.0249	0.508	1
1425	COCAINE_BRAIN_5D_UP	-0.0011	0.522	1
1287	IDX_TSA_DN_CLUSTER4	-0.0081	0.542	1
