# Supplementary material for: Altered Gene Expression and DNA Damage in Peripheral Blood Cells from Friedreich's Ataxia Patients: Cellular Model of Pathology
Source: PLoS Genet. 2010 Jan 15;6(1):e1000812. doi: 10.1371/journal.pgen.1000812 (PMC2799513; doi:10.1371/journal.pgen.1000812)
Supplement: Dataset S7 — Biologically informative gene sets for FRDA lymphoblastoid data using Gene Set Analysis and compared to FRDA children gene sets. (0.20 MB XLS) [file pgen.1000812.s019.xls]

## Sheet: GSA
Set Name	Cell line Score	Cell line p-value	FRDA children Score	FRDA children p-value	Mean Score (cell line and FRDA children)	Mean p-value (cell line and FRDA children)
MMS_MOUSE_LYMPH_HIGH_4HRS_UP	0.6381	0.002	-0.7369	0.002	-0.0494	0.002
ZHAN_MM_CD138_CD1_VS_REST	-0.6537	0.002	0.4805	0.014	-0.0866	0.008
UVC_HIGH_D9_DN	-0.5041	0.018	-0.733	0.008	-0.61855	0.013
MYOSINPATHWAY	-0.6442	0.018	-0.6721	0.014	-0.65815	0.016
ST_MYOCYTE_AD_PATHWAY	-0.4105	0.034	-0.4351	0.006	-0.4228	0.02
CMV_HCMV_TIMECOURSE_6HRS_DN	-0.2702	0.026	-0.531	0.016	-0.4006	0.021
41BBPATHWAY	-0.5836	0.044	-0.9157	0.001	-0.74965	0.0225
CHEN_HOXA5_TARGETS_UP	-0.2984	0.02	-0.5991	0.026	-0.44875	0.023
CMV-UV_HCMV_6HRS_DN	-0.2686	0.012	-0.1775	0.034	-0.22305	0.023
UVC_XPCS_4HR_DN	-0.1961	0.04	-0.5225	0.014	-0.3593	0.027
UVC_XPCS_4HR_UP	0.5794	0.026	-0.6511	0.028	-0.03585	0.027
PAR1PATHWAY	-0.4335	0.054	-0.7971	0.001	-0.6153	0.0275
UV-CMV_UNIQUE_HCMV_6HRS_DN	-0.1988	0.04	-0.2488	0.02	-0.2238	0.03
NI2_MOUSE_DN	-0.2734	0.024	0.4476	0.04	0.0871	0.032
PASSERINI_TRANSCRIPTION	-0.346	0.002	-0.1989	0.072	-0.27245	0.037
UVB_NHEK2_DN	0.1683	0.062	-0.3615	0.012	-0.0966	0.037
CPR_NULL-LOW_LIVER_UP	-0.4745	0.06	0.4997	0.014	0.0126	0.037
HDACI_COLON_TSABUT_UP	-0.4052	0.008	-0.2181	0.066	-0.31165	0.037
EICOSANOID_SYNTHESIS	-0.4028	0.05	0.9032	0.028	0.2502	0.039
MITOCHONDRIAL_FATTY_ACID_BETAOXIDATION	0.2845	0.076	-0.7366	0.002	-0.22605	0.039
BADPATHWAY	0.4263	0.026	-0.3662	0.054	0.03005	0.04
DCPATHWAY	-0.61	0.048	0.5376	0.032	-0.0362	0.04
ZHAN_MM_MOLECULAR_CLASSI_UP	-0.3394	0.076	0.4301	0.006	0.04535	0.041
UVB_SCC_DN	-0.295	0.01	-0.2301	0.074	-0.26255	0.042
PARK_HSC_VS_MPP_UP	0.8017	0.074	-0.816	0.012	-0.00715	0.043
ST_ADRENERGIC	-0.3296	0.046	-0.3155	0.042	-0.32255	0.044
SIG_REGULATION_OF_THE_ACTIN_CYTOSKELETON_BY_RHO_GTPASES	0.2779	0.054	-0.384	0.034	-0.05305	0.044
UVC_TTD-XPCS_COMMON_DN	-0.1378	0.078	-0.4533	0.012	-0.29555	0.045
CMV_HCMV_TIMECOURSE_12HRS_UP	-0.9093	0.006	0.4948	0.086	-0.20725	0.046
MOUSE_TISSUE_TESTIS	-0.6103	0.001	0.3966	0.094	-0.10685	0.0475
HDACI_COLON_TSA_UP	-0.2793	0.022	-0.1611	0.074	-0.2202	0.048
TSA_RKO_UP	-0.5369	0.022	-0.2343	0.078	-0.3856	0.05
IDX_TSA_UP_CLUSTER4	0.4228	0.024	0.3112	0.076	0.367	0.05
VEGF_HUVEC_2HRS_UP	-0.3167	0.022	0.4427	0.08	0.063	0.051
CROONQUIST_RAS_STROMA_UP	-0.6012	0.018	0.3293	0.086	-0.13595	0.052
DSRNA_DN	-0.2026	0.088	0.5195	0.016	0.15845	0.052
CELL_CYCLE_ARREST	0.232	0.058	-0.2941	0.046	-0.03105	0.052
CPR_NULL_LIVER_UP	-0.3447	0.076	0.2989	0.034	-0.0229	0.055
HDACI_COLON_BUT16HRS_UP	-0.4492	0.054	-0.249	0.056	-0.3491	0.055
UVC_TTD_4HR_DN	-0.1459	0.108	-0.5704	0.006	-0.35815	0.057
BCRABL_HL60_CDNA_DN	-0.3831	0.062	0.4434	0.054	0.03015	0.058
HDACI_COLON_BUT2HRS_UP	-0.2878	0.032	-0.1798	0.084	-0.2338	0.058
HDACI_COLON_TSA2HRS_UP	-0.3366	0.04	-0.239	0.078	-0.2878	0.059
CROONQUIST_IL6_RAS_UP	-0.4158	0.076	0.4228	0.042	0.0035	0.059
IL17PATHWAY	-0.3987	0.07	0.4536	0.052	0.02745	0.061
CDC42RACPATHWAY	0.6752	0.048	-0.7309	0.074	-0.02785	0.061
BRACX_UP	0.3397	0.102	-0.8697	0.02	-0.265	0.061
SALMONELLAPATHWAY	0.7838	0.022	-0.4747	0.106	0.15455	0.064
P53PATHWAY	0.385	0.074	0.4654	0.054	0.4252	0.064
PARK_MSCS_LIN2	-0.2349	0.114	-0.4321	0.016	-0.3335	0.065
CHESLER_BRAIN_NEURAL_HIGH_GENES	-0.337	0.086	0.5667	0.048	0.11485	0.067
UVB_NHEK1_DN	-0.0998	0.12	-0.4473	0.014	-0.27355	0.067
UVC_HIGH_D3_DN	0.2247	0.04	-0.2959	0.096	-0.0356	0.068
IDX_TSA_UP_CLUSTER6	0.2786	0.02	0.1553	0.118	0.21695	0.069
TGFBPATHWAY	0.2872	0.094	-0.4603	0.044	-0.08655	0.069
NGUYEN_KERATO_DN	-0.3682	0.012	-0.1815	0.128	-0.27485	0.07
PROSTAGLANDIN_AND_LEUKOTRIENE_METABOLISM	-0.2094	0.082	0.4395	0.06	0.11505	0.071
RADIATION_SENSITIVITY	0.306	0.082	-0.2773	0.062	0.01435	0.072
KIM_TH_CELLS_DN	-0.5014	0.112	-0.7523	0.038	-0.62685	0.075
PURINE_METABOLISM	0.2729	0.01	0.203	0.14	0.23795	0.075
RCC_NL_UP	0.1766	0.02	-0.2118	0.134	-0.0176	0.077
ACTINYPATHWAY	0.666	0.022	-0.2891	0.132	0.18845	0.077
SIG_INSULIN_RECEPTOR_PATHWAY_IN_CARDIAC_MYOCYTES	0.265	0.06	-0.332	0.096	-0.0335	0.078
GENOTOXINS_ALL_24HRS_REG	0.2778	0.112	-0.4663	0.044	-0.09425	0.078
CMV_HCMV_TIMECOURSE_ALL_UP	-0.1547	0.086	-0.1348	0.07	-0.14475	0.078
UVC_TTD_ALL_DN	-0.0968	0.148	-0.4737	0.008	-0.28525	0.078
ET743_SARCOMA_6HRS_UP	0.3725	0.06	0.3831	0.096	0.3778	0.078
HEMATOP_STEM_ALL_UP	-0.2452	0.074	0.2364	0.084	-0.0044	0.079
GAMMA-UV_FIBRO_DN	-0.2356	0.046	-0.2013	0.112	-0.21845	0.079
PASSERINI_OXIDATION	0.6761	0.01	0.3712	0.152	0.52365	0.081
METASTASIS_ADENOCARC_DN	-0.3765	0.086	0.341	0.08	-0.01775	0.083
HDACI_COLON_TSA48HRS_UP	-0.3852	0.072	-0.2435	0.094	-0.31435	0.083
TSA_PANC50_UP	-0.3721	0.096	0.4442	0.072	0.03605	0.084
IFNALPHA_RESIST_DN	-0.4129	0.014	-0.2479	0.154	-0.3304	0.084
POD1_KO_MOST_DN	-0.363	0.03	0.2693	0.14	-0.04685	0.085
TPA_RESIST_MIDDLE_DN	-0.2142	0.03	0.1458	0.142	-0.0342	0.086
LEE_MYC_E2F1_UP	0.2898	0.024	0.1841	0.148	0.23695	0.086
UV_UNIQUE_FIBRO_DN	0.2528	0.052	-0.2249	0.12	0.01395	0.086
NAKAJIMA_MCS_UP	-0.2016	0.11	0.3009	0.064	0.04965	0.087
BREASTCA_TWO_CLASSES	0.2328	0.06	-0.2207	0.114	0.00605	0.087
ST_PHOSPHOINOSITIDE_3_KINASE_PATHWAY	0.2332	0.12	-0.4983	0.056	-0.13255	0.088
FETAL_LIVER_ENRICHED_TRANSCRIPTION_FACTORS	-0.3355	0.046	-0.1392	0.132	-0.23735	0.089
GH_AUTOCRINE_DN	-0.1318	0.142	0.2673	0.038	0.06775	0.09
HADDAD_HSC_CD7_UP	-0.2139	0.174	0.5746	0.006	0.18035	0.09
HADDAD_CD45CD7_PLUS_VS_MINUS_UP	-0.2139	0.174	0.5746	0.006	0.18035	0.09
GO_ROS	-0.1419	0.176	0.5619	0.004	0.21	0.09
STRESS_ARSENIC_SPECIFIC_UP	-0.1616	0.068	-0.1345	0.114	-0.14805	0.091
TELPATHWAY	-0.2638	0.098	-0.3172	0.084	-0.2905	0.091
ST_GA13_PATHWAY	-0.2394	0.094	-0.1987	0.09	-0.21905	0.092
ICF_DN	-0.7618	0.058	0.2855	0.126	-0.23815	0.092
HDACI_COLON_SUL_UP	0.0769	0.158	-0.1262	0.026	-0.02465	0.092
PARP_KO_UP	0.4744	0.126	0.3912	0.06	0.4328	0.093
ZHAN_MULTIPLE_MYELOMA_VS_NORMAL_UP	0.2842	0.058	-0.1717	0.13	0.05625	0.094
BLEO_MOUSE_LYMPH_HIGH_24HRS_DN	0.6279	0.022	-0.2939	0.166	0.167	0.094
BROCKE_IL6	-0.2501	0.04	-0.1543	0.148	-0.2022	0.094
KRETZSCHMAR_IL6_DIFF	-0.2501	0.04	-0.1543	0.148	-0.2022	0.094
PEART_HISTONE_DN	0.2077	0.116	0.171	0.074	0.18935	0.095
UVC_HIGH_D2_DN	-0.1899	0.126	-0.366	0.064	-0.27795	0.095
BRCA1_OVEREXP_PROSTATE_DN	0.2618	0.056	-0.1181	0.134	0.07185	0.095
OLDONLY_FIBRO_DN	-0.1021	0.184	-0.3155	0.006	-0.2088	0.095
KANNAN_P53_UP	0.3498	0.038	0.2152	0.154	0.2825	0.096
MMS_HUMAN_LYMPH_LOW_4HRS_DN	-0.3062	0.186	-1.1264	0.01	-0.7163	0.098
BLEO_MOUSE_LYMPH_LOW_24HRS_DN	0.4757	0.132	-0.5871	0.064	-0.0557	0.098
BRENTANI_IMMUNE_FUNCTION	-0.3437	0.048	0.2407	0.148	-0.0515	0.098
CHANG_SERUM_RESPONSE_DN	-0.1238	0.162	-0.1734	0.034	-0.1486	0.098
NO2IL12PATHWAY	-0.4827	0.02	0.2795	0.178	-0.1016	0.099
HSC_HSC_SHARED	-0.1649	0.006	0.1499	0.192	-0.0075	0.099
CK1PATHWAY	0.276	0.088	-0.3013	0.11	-0.01265	0.099
BRCA1_SW480_UP	0.3766	0.016	0.2	0.182	0.2883	0.099
STEMCELL_COMMON_UP	0.1799	0.096	-0.4044	0.104	-0.11225	0.1
AGED_MOUSE_CORTEX_UP	0.5494	0.044	-0.3247	0.156	0.11235	0.1
PHOSPHATIDYLINOSITOL_SIGNALING_SYSTEM	-0.1763	0.03	-0.1336	0.17	-0.15495	0.1
CALCIUM_REGULATION_IN_CARDIAC_CELLS	-0.084	0.154	0.3163	0.048	0.11615	0.101
BRENTANI_TRANSPORT_OF_VESICLES	0.2088	0.114	-0.2978	0.088	-0.0445	0.101
LAL_KO_6MO_UP	-0.2895	0.07	0.2625	0.134	-0.0135	0.102
P53GENES_ALL	0.4002	0.166	0.3779	0.04	0.38905	0.103
SMOOTH_MUSCLE_CONTRACTION	-0.0813	0.19	0.2575	0.018	0.0881	0.104
HOHENKIRK_MONOCYTE_DEND_DN	-0.2025	0.052	0.2374	0.156	0.01745	0.104
SA_G1_AND_S_PHASES	0.3398	0.076	0.3504	0.132	0.3451	0.104
HEARTFAILURE_VENTRICLE_DN	0.1974	0.126	0.2099	0.082	0.20365	0.104
ABRAHAM_AL_VS_MM_DN	0.2025	0.176	-0.4658	0.034	-0.13165	0.105
MRNA_SPLICING	0.2766	0.112	-0.5476	0.1	-0.1355	0.106
GH_EXOGENOUS_ANY_UP	-0.0932	0.126	0.3471	0.088	0.12695	0.107
NUCLEAR_RECEPTORS	-0.2022	0.148	0.5088	0.066	0.1533	0.107
HDACI_COLON_SUL30MIN_DN	0.182	0.204	-0.7763	0.012	-0.29715	0.108
ARFPATHWAY	-0.1982	0.104	-0.3534	0.114	-0.2758	0.109
ST_G_ALPHA_S_PATHWAY	-0.2156	0.202	-0.6697	0.018	-0.44265	0.11
GALE_FLT3ANDAPL_DN	-0.7496	0.044	-0.2826	0.178	-0.5161	0.111
LH_GRANULOSA_UP	0.1125	0.192	-0.2094	0.03	-0.04845	0.111
HSC_HSC_ADULT	-0.1449	0.012	0.1259	0.212	-0.0095	0.112
PARK_MSCS_DIFF	0.3317	0.182	-0.5941	0.042	-0.1312	0.112
ROTH_HTERT_DIFF	0.2767	0.096	0.2463	0.128	0.2615	0.112
HYPOXIA_NORMAL_UP	-0.1625	0.094	-0.1059	0.13	-0.1342	0.112
IRS_KO_ADIP_UP	-0.2014	0.106	0.3379	0.12	0.06825	0.113
RESISTANCE_XENOGRAFTS_UP	-0.2877	0.076	0.3056	0.152	0.00895	0.114
FSH_GRANULOSA_UP	0.1295	0.178	-0.1844	0.05	-0.02745	0.114
UVB_NHEK3_C5	-0.3603	0.012	-0.1539	0.22	-0.2571	0.116
AGED_MOUSE_MUSCLE_UP	-0.184	0.17	-0.3009	0.064	-0.24245	0.117
GH_EXOGENOUS_LATE_DN	-0.0947	0.15	0.2841	0.086	0.0947	0.118
HSC_HSC_FETAL	-0.1516	0.014	0.1206	0.222	-0.0155	0.118
RACCYCDPATHWAY	0.2381	0.174	-0.4843	0.064	-0.1231	0.119
P53HYPOXIAPATHWAY	0.2903	0.118	0.2843	0.122	0.2873	0.12
GOLDRATH_HP	0.3911	0.018	-0.1931	0.222	0.099	0.12
GLEEVECPATHWAY	-0.2117	0.186	-0.4903	0.056	-0.351	0.121
HBX_HCC_DN	-0.2807	0.202	-0.518	0.04	-0.39935	0.121
ST_GA12_PATHWAY	-0.1358	0.202	0.414	0.04	0.1391	0.121
MRNA_PROCESSING	0.2578	0.122	-0.558	0.122	-0.1501	0.122
G1PATHWAY	0.2598	0.108	-0.2482	0.136	0.0058	0.122
ADIPOCYTE_PPARG_UP	0.1996	0.24	0.7907	0.006	0.49515	0.123
FERRANDO_T_CELL_DIFFERENTIATION_PATHWAY	-0.2048	0.244	1.0262	0.002	0.4107	0.123
ZHANG_EFT_EWSFLI1_UP	-0.2283	0.058	0.1354	0.19	-0.04645	0.124
PASSERINI_PROLIFERATION	0.1884	0.142	-0.1652	0.106	0.0116	0.124
OLD_FIBRO_UP	-0.1164	0.12	-0.1801	0.128	-0.14825	0.124
VHL_NORMAL_UP	0.1484	0.042	-0.1168	0.208	0.0158	0.125
PENG_GLUCOSE_UP	-0.6408	0.02	0.1437	0.23	-0.24855	0.125
AGED_MOUSE_HIPPOCAMPUS_ANY_UP	0.1199	0.208	-0.2441	0.042	-0.0621	0.125
AGUIRRE_PANCREAS_CHR12	-0.1095	0.142	-0.2422	0.11	-0.17585	0.126
LEE_E2F1_UP	0.2712	0.056	0.1817	0.196	0.22645	0.126
ROME_INSULIN_2F_UP	0.2639	0.036	-0.1905	0.218	0.0367	0.127
INSULIN_SIGNALING	0.1295	0.176	-0.2445	0.078	-0.0575	0.127
LEE_MYC_TGFA_UP	0.2008	0.162	0.2193	0.092	0.21005	0.127
RADMACHER_AMLNORMALKARYTYPE_SIG	-0.4144	0.004	-0.1529	0.252	-0.28365	0.128
RANKLPATHWAY	-0.1564	0.208	0.3733	0.048	0.10845	0.128
HCC_SURVIVAL_GOOD_VS_POOR_DN	0.414	0.054	-0.3184	0.204	0.0478	0.129
UVB_SCC_UP	0.2482	0.174	-0.4639	0.084	-0.10785	0.129
HALMOS_CEBP_DN	-0.165	0.224	0.4982	0.034	0.1666	0.129
RIBAVIRIN_RSV_UP	-0.4802	0.034	0.2661	0.224	-0.10705	0.129
MARSHALL_SPLEEN_BAL	0.1441	0.186	-0.3373	0.074	-0.0966	0.13
BRCA1_SW480_DN	0.1759	0.196	0.507	0.066	0.34145	0.131
STRESS_GENOTOXIC_SPECIFIC_UP	-0.2375	0.094	0.272	0.168	0.01725	0.131
PRMT5_KD_DN	-0.2941	0.146	0.3175	0.116	0.0117	0.131
UVC_XPCS_ALL_UP	-0.2054	0.046	-0.0882	0.218	-0.1468	0.132
GH_AUTOCRINE_UP	-0.1197	0.1	0.192	0.164	0.03615	0.132
CARIES_PULP_UP	-0.1866	0.19	0.3208	0.074	0.0671	0.132
REOVIRUS_HEK293_UP	-0.0824	0.242	-0.4358	0.024	-0.2591	0.133
TRANSLATION_FACTORS	0.3201	0.092	-0.4268	0.174	-0.05335	0.133
METHOTREXATE_PROBCELL_UP	0.2483	0.174	-0.3018	0.092	-0.02675	0.133
INSULIN_ADIP_SENS_DN	-0.6986	0.002	-0.091	0.264	-0.3948	0.133
INNEREAR_UP	0.319	0.124	0.3775	0.142	0.34825	0.133
UVC_HIGH_D8_DN	0.2392	0.124	-0.3004	0.142	-0.0306	0.133
FLECHNER_KIDNEY_TRANSPLANT_WELL_PBL_DN	-0.1898	0.188	-0.5286	0.082	-0.3592	0.135
HDACI_COLON_CLUSTER4	0.2097	0.194	0.3216	0.076	0.26565	0.135
GH_EXOGENOUS_LATE_UP	-0.2047	0.116	0.2715	0.154	0.0334	0.135
CELLCYCLEPATHWAY	0.3995	0.066	-0.1872	0.204	0.10615	0.135
ABRAHAM_MM_VS_AL_UP	0.1618	0.234	-0.4076	0.038	-0.1229	0.136
CIRCADIAN_EXERCISE	0.1235	0.262	-0.5589	0.012	-0.2177	0.137
HUMAN_CD34_ENRICHED_TRANSCRIPTION_FACTORS	-0.0634	0.266	-0.2626	0.008	-0.163	0.137
MRNA_PROCESSING_REACTOME	0.2474	0.082	-0.3272	0.192	-0.0399	0.137
TSADAC_PANC50_UP	-0.2016	0.222	0.4212	0.052	0.1098	0.137
ST_DIFFERENTIATION_PATHWAY_IN_PC12_CELLS	-0.1361	0.262	-0.3347	0.012	-0.2354	0.137
HDACI_COLON_SUL12HRS_UP	-0.4089	0.04	0.1849	0.238	-0.112	0.139
GPCRPATHWAY	0.1383	0.24	-0.5487	0.038	-0.2052	0.139
JISON_SICKLECELL_DIFF	0.0977	0.098	-0.1662	0.18	-0.03425	0.139
HDACI_COLON_CUR_UP	0.1606	0.026	-0.0883	0.252	0.03615	0.139
BHATTACHARYA_ESC_UP	0.2816	0.104	-0.2405	0.176	0.02055	0.14
CYTOKINEPATHWAY	-0.5857	0.042	0.2753	0.238	-0.1552	0.14
POD1_KO_UP	0.0683	0.156	0.2126	0.124	0.14045	0.14
RHOPATHWAY	0.3264	0.036	-0.0956	0.244	0.1154	0.14
SCHUMACHER_MYC_UP	0.6212	0.036	-0.2426	0.244	0.1893	0.14
SMITH_HCV_INDUCED_HCC_UP	0.3424	0.054	0.0994	0.226	0.2209	0.14
WANG_MLL_CBP_VS_GMP_UP	-0.2291	0.084	0.1328	0.196	-0.04815	0.14
MOREAUX_TACI_HI_VS_LOW_DN	0.2664	0.138	-0.5452	0.144	-0.1394	0.141
SERUM_FIBROBLAST_CORE_DN	-0.147	0.074	-0.0701	0.21	-0.10855	0.142
CALRES_MOUSE_NEOCORTEX_UP	0.2392	0.052	0.1338	0.232	0.1865	0.142
THELPERPATHWAY	-0.774	0.05	-0.2338	0.234	-0.5039	0.142
CAMPTOTHECIN_PROBCELL_UP	0.1784	0.174	0.1864	0.112	0.1824	0.143
CELL_SURFACE_RECEPTOR_LINKED_SIGNAL_TRANSDUCTION	-0.1745	0.212	0.2207	0.074	0.0231	0.143
UVC_HIGH_ALL_UP	-0.348	0.112	0.2687	0.174	-0.03965	0.143
HDACI_COLON_BUT_DN	0.0807	0.14	-0.1602	0.146	-0.03975	0.143
HSC_MATURE_ADULT	-0.0621	0.158	-0.1654	0.128	-0.11375	0.143
ZHAN_MM_CD138_LB_VS_REST	-0.1429	0.202	0.3828	0.084	0.11995	0.143
TNFA_NFKB_DEP_UP	-0.2817	0.254	0.4631	0.034	0.0907	0.144
FATTY_ACID_SYNTHESIS	-0.1154	0.272	-0.6668	0.018	-0.3911	0.145
MANALO_HYPOXIA_DN	0.3374	0.082	-0.1909	0.208	0.07325	0.145
ET743_SARCOMA_72HRS_DN	0.1187	0.22	-0.4594	0.072	-0.17035	0.146
TAVOR_CEBP_DN	-0.5859	0.05	0.1387	0.242	-0.2236	0.146
HDACPATHWAY	-0.2322	0.132	-0.1865	0.16	-0.20935	0.146
P21_P53_ANY_DN	0.6493	0.018	0.1356	0.274	0.39245	0.146
IGF1RPATHWAY	0.2422	0.16	-0.382	0.132	-0.0699	0.146
IL1_CORNEA_UP	-0.0914	0.264	0.3291	0.028	0.11885	0.146
UBIQUITIN_MEDIATED_PROTEOLYSIS	0.4443	0.048	-0.2101	0.246	0.1171	0.147
FRASOR_ER_UP	-0.2621	0.192	0.3021	0.102	0.02	0.147
DRUG_RESISTANCE_AND_METABOLISM	0.1469	0.038	0.0918	0.258	0.11935	0.148
HIPPOCAMPUS_DEVELOPMENT_POSTNATAL	0.1852	0.088	-0.1683	0.208	0.00845	0.148
PLATELET_EXPRESSED	0.6168	0.008	-0.1361	0.288	0.24035	0.148
BRENTANI_CYTOSKELETON	0.434	0.028	0.1612	0.268	0.2976	0.148
STANELLE_E2F1_UP	-0.281	0.094	0.2098	0.202	-0.0356	0.148
PENG_GLUCOSE_DN	0.1312	0.182	-0.2436	0.116	-0.0562	0.149
GSK3PATHWAY	-0.3776	0.056	-0.138	0.242	-0.2578	0.149
ALZHEIMERS_INCIPIENT_UP	-0.0912	0.054	-0.0714	0.244	-0.0813	0.149
LEE_TCELLS4_UP	-0.2886	0.208	-0.41	0.09	-0.3493	0.149
FSH_OVARY_MCV152_UP	-0.1129	0.288	-0.2859	0.01	-0.1994	0.149
ET743_SARCOMA_48HRS_DN	0.1181	0.228	-0.5005	0.07	-0.1912	0.149
ZHAN_MM_CD1_VS_CD2_UP	-0.1843	0.18	-0.2547	0.12	-0.2195	0.15
YAGI_AML_PROG_FAB	-0.1509	0.082	-0.0675	0.22	-0.1092	0.151
CELL_ADHESION_MOLECULE_ACTIVITY	-0.1206	0.26	0.3514	0.042	0.1154	0.151
XPB_TTD-CS_UP	0.3732	0.162	0.4173	0.14	0.39525	0.151
FERRANDO_MLL_T_ALL_DN	0.3199	0.042	-0.1397	0.262	0.0901	0.152
INOS_ALL_UP	0.3318	0.058	-0.2325	0.246	0.04965	0.152
IL6PATHWAY	-0.2734	0.118	-0.2547	0.186	-0.26405	0.152
INSULINPATHWAY	-0.1452	0.242	-0.3856	0.062	-0.2654	0.152
ET743_SARCOMA_DN	0.1001	0.234	-0.4305	0.072	-0.1652	0.153
MAGRANGEAS_MULTIPLE_MYELOMA_IGL_VS_IGK_UP	-0.4121	0.036	0.1827	0.27	-0.1147	0.153
HDACI_COLON_BUT_UP	-0.2528	0.022	-0.0363	0.284	-0.14455	0.153
P21_P53_MIDDLE_DN	0.7943	0.014	0.1296	0.292	0.46195	0.153
VEGFPATHWAY	0.1693	0.178	-0.3034	0.128	-0.06705	0.153
COMPLEMENT_ACTIVATION_CLASSICAL	0.1543	0.254	0.6833	0.052	0.4188	0.153
HDACI_COLON_SUL12HRS_DN	-0.0845	0.284	0.4037	0.024	0.1596	0.154
UVB_NHEK3_C2	-0.0574	0.304	-0.7741	0.004	-0.41575	0.154
CHESLER_BRAIN_HIGHEST_VARIANCE_GENES	-0.29	0.084	-0.1708	0.224	-0.2304	0.154
LEE_TCELLS5_UP	-0.6329	0.028	-0.1128	0.28	-0.37285	0.154
HOUSTIS_ROS	0.5354	0.074	0.1507	0.236	0.34305	0.155
HDACI_COLON_BUT16HRS_DN	0.2465	0.032	-0.1309	0.278	0.0578	0.155
PROLIFERATION_GENES	-0.0297	0.308	0.2111	0.002	0.0907	0.155
EMT_DN	-0.142	0.248	0.3169	0.062	0.08745	0.155
FSH_OVARY_MCV152_DN	0.0712	0.278	-0.4228	0.032	-0.1758	0.155
REFRACTORY_GASTRIC_UP	-0.05	0.294	0.3556	0.018	0.1528	0.156
PEART_HISTONE_UP	0.1839	0.116	-0.161	0.196	0.01145	0.156
HDACI_COLON_SUL48HRS_UP	0.0571	0.286	-0.1871	0.026	-0.065	0.156
UVC_HIGH_D7_DN	-0.0879	0.298	-0.4576	0.018	-0.27275	0.158
GH_EXOGENOUS_MIDDLE_UP	-0.0774	0.274	0.6202	0.042	0.2714	0.158
IGF_VS_PDGF_UP	-0.1336	0.228	0.4124	0.088	0.1394	0.158
EGFPATHWAY	-0.1839	0.228	-0.3896	0.088	-0.28675	0.158
VENTRICLES_UP	0.1774	0.104	0.0651	0.212	0.12125	0.158
SMITH_HTERT_UP	-0.1395	0.058	-0.1323	0.26	-0.1359	0.159
PENTOSE_PHOSPHATE_PATHWAY	0.2291	0.178	0.2493	0.14	0.2392	0.159
YAO_P4_KO_VS_WT_UP	-0.2073	0.148	0.2647	0.17	0.0287	0.159
JISON_SICKLE_CELL	0.4452	0.036	0.1293	0.284	0.28725	0.16
LEE_MYC_UP	0.1069	0.256	0.2606	0.064	0.18375	0.16
HOFMANN_MDS_CD34_HIGH_RISK	-0.14	0.22	0.293	0.1	0.0765	0.16
ELONGINA_KO_DN	0.2037	0.038	0.0521	0.282	0.1279	0.16
PENG_GLUTAMINE_UP	-0.2264	0.022	-0.0427	0.298	-0.13455	0.16
IL22BPPATHWAY	-0.7182	0.008	0.1993	0.314	-0.25945	0.161
HDACI_COLON_BUT48HRS_DN	-0.0596	0.21	-0.2429	0.112	-0.15125	0.161
DAC_IFN_BLADDER_UP	-0.3628	0.17	0.3602	0.152	-0.0013	0.161
PITUITARY_FETAL_UP	0.266	0.228	-0.383	0.094	-0.0585	0.161
TFF2_KO_UP	-0.2562	0.192	0.2335	0.13	-0.01135	0.161
ROSS_PML_RAR	-0.1439	0.16	0.1965	0.164	0.0263	0.162
PDGFPATHWAY	-0.1918	0.232	-0.4118	0.092	-0.3018	0.162
ST_JNK_MAPK_PATHWAY	-0.064	0.304	-0.4477	0.02	-0.25585	0.162
SHEPARD_GENES_COMMON_BW_CB_MO	0.1032	0.208	0.2884	0.116	0.1958	0.162
MITOCHONDRIA	0.3864	0.001	0.0792	0.324	0.2328	0.1625
KANG_TERT_DN	-0.0753	0.282	0.4225	0.044	0.1736	0.163
ZHAN_MULTIPLE_MYELOMA_SUBCLASSES_DIFF	0.4881	0.038	-0.1798	0.288	0.15415	0.163
BAF57_BT549_DN	0.1405	0.142	-0.1153	0.186	0.0126	0.164
LEE_TCELLS10_UP	-0.0868	0.28	-0.2298	0.048	-0.1583	0.164
LEE_TCELLS8_UP	-0.0868	0.28	-0.2298	0.048	-0.1583	0.164
LEE_TCELLS1_UP	-0.0868	0.28	-0.2298	0.048	-0.1583	0.164
FLECHNER_KIDNEY_TRANSPLANT_REJECTION_UP	-0.4233	0.07	0.2124	0.258	-0.10545	0.164
P53_BRCA1_UP	0.3157	0.136	0.1838	0.194	0.24975	0.165
MPRPATHWAY	0.1576	0.164	-0.1922	0.166	-0.0173	0.165
TSA_CD4_UP	-0.1636	0.25	0.4908	0.08	0.1636	0.165
HALMOS_CEBP_UP	-0.1291	0.284	-0.3158	0.046	-0.22245	0.165
IDX_TSA_DN_CLUSTER5	-0.1475	0.256	-0.3739	0.076	-0.2607	0.166
BYSTROM_IL5_DN	-0.1353	0.3	-0.4359	0.034	-0.2856	0.167
PS1PATHWAY	-0.4573	0.022	0.1558	0.312	-0.15075	0.167
HUMAN_MITODB_6_2002	0.3988	0.002	0.0904	0.332	0.2446	0.167
LEE_DENA_UP	-0.0909	0.3	0.3183	0.036	0.1137	0.168
UVC_XPCS_ALL_DN	-0.0362	0.33	-0.5414	0.006	-0.2888	0.168
NAB_LUNG_DN	0.1304	0.136	0.1859	0.2	0.15815	0.168
HEARTFAILURE_ATRIA_DN	0.1676	0.082	0.0737	0.256	0.12065	0.169
BETA_ALANINE_METABOLISM	-0.3205	0.018	0.0864	0.32	-0.11705	0.169
MYC_TARGETS	0.5227	0.05	-0.1303	0.29	0.1962	0.17
HSC_LTHSC_ADULT	-0.1438	0.034	0.1056	0.306	-0.0191	0.17
CHIARETTI_T_ALL_DIFF	-0.2009	0.06	-0.0536	0.28	-0.12725	0.17
GAMMA_UNIQUE_FIBRO_DN	0.1125	0.178	0.2115	0.164	0.162	0.171
LEE_TCELLS3_UP	0.3728	0.088	0.1821	0.254	0.27745	0.171
OVARIAN_INFERTILITY_GENES	-0.312	0.036	0.1154	0.306	-0.0983	0.171
TAKEDA_NUP8_HOXA9_6H_DN	-0.384	0.044	0.1102	0.3	-0.1369	0.172
HUMAN_TISSUE_LIVER	-0.1204	0.196	0.3657	0.148	0.12265	0.172
CMV_8HRS_UP	-0.5607	0.044	0.1531	0.3	-0.2038	0.172
VANASSE_BCL2_TARGETS	-0.1325	0.11	0.1141	0.234	-0.0092	0.172
ZHAN_MM_MOLECULAR_CLASSI_DN	-0.2053	0.234	-0.1984	0.11	-0.20185	0.172
HUMAN_TISSUE_PANCREAS	-0.3131	0.048	0.1853	0.298	-0.0639	0.173
MMS_MOUSE_LYMPH_HIGH_24HRS_UP	0.2571	0.196	-0.3914	0.15	-0.06715	0.173
ST_GRANULE_CELL_SURVIVAL_PATHWAY	0.1495	0.196	-0.2093	0.15	-0.0299	0.173
LINDSTEDT_DEND_UP	-0.4259	0.156	-0.1547	0.19	-0.2903	0.173
CMV_HCMV_TIMECOURSE_18HRS_UP	-0.0811	0.322	-0.6921	0.024	-0.3866	0.173
TNFR1PATHWAY	-0.1881	0.31	-0.4553	0.038	-0.3217	0.174
BUTANOATE_METABOLISM	0.2643	0.118	-0.1354	0.232	0.06445	0.175
CMV_HCMV_TIMECOURSE_1HR_DN	-0.2315	0.162	0.1242	0.19	-0.05365	0.176
LINDSTEDT_DEND_DN	0.2483	0.078	0.091	0.274	0.16965	0.176
OXIDATIVE_PHOSPHORYLATION	0.4222	0.01	0.1045	0.344	0.26335	0.177
WELCSH_BRCA_UP	0.2826	0.134	0.1091	0.22	0.19585	0.177
VEGF_MMMEC_12HRS_UP	-0.2272	0.268	0.5858	0.086	0.1793	0.177
CMV_HCMV_TIMECOURSE_14HRS_DN	-0.1011	0.316	-0.2921	0.038	-0.1966	0.177
CMV_HCMV_TIMECOURSE_16HRS_UP	-0.0965	0.23	-0.3098	0.124	-0.20315	0.177
G_PROTEIN_SIGNALING	-0.0779	0.218	-0.1334	0.136	-0.10565	0.177
TCYTOTOXICPATHWAY	-0.5897	0.092	-0.2338	0.264	-0.41175	0.178
TNFALPHA_4HRS_UP	0.4062	0.022	0.0702	0.334	0.2382	0.178
CPR_NULL_LIVER_DN	0.2067	0.188	0.4587	0.17	0.3327	0.179
CHIARETTI_ZAP70_DIFF	-0.1836	0.168	-0.0924	0.19	-0.138	0.179
TNFALPHA_ALL_UP	0.1954	0.05	-0.0716	0.308	0.0619	0.179
BRCA1_OVEREXP_DN	0.2919	0.06	-0.0904	0.298	0.10075	0.179
HG_PROGERIA_DN	0.524	0.082	0.1167	0.276	0.32035	0.179
ESR_FIBROBLAST_DN	-0.1174	0.29	-0.3565	0.07	-0.23695	0.18
SHIPP_FL_VS_DLBCL_DN	0.4703	0.048	-0.1283	0.314	0.171	0.181
TNFR2PATHWAY	-0.5245	0.152	-0.259	0.21	-0.39175	0.181
HYPOXIA_RCC_NOVHL_UP	0.2035	0.034	-0.0592	0.33	0.07215	0.182
AGED_MOUSE_HYPOTH_UP	0.3191	0.104	-0.3056	0.26	0.00675	0.182
CROMER_HYPOPHARYNGEAL_MET_VS_NON_DN	0.11	0.25	0.2518	0.114	0.1809	0.182
INFLAMPATHWAY	-0.4071	0.076	0.1691	0.288	-0.119	0.182
OLDONLY_FIBRO_UP	-0.3788	0.002	-0.0757	0.362	-0.22725	0.182
HOGERKORP_CD44_TEMPORALLY_DN	-0.525	0.038	0.1633	0.326	-0.18085	0.182
MCALPAINPATHWAY	0.1204	0.286	-0.353	0.078	-0.1163	0.182
MOREAUX_TACI_HI_IN_PPC_UP	0.4584	0.076	-0.2373	0.29	0.11055	0.183
ST_G_ALPHA_I_PATHWAY	-0.2471	0.088	-0.1325	0.278	-0.1898	0.183
KUMAR_HOXA_DIFF	-0.1041	0.07	0.0406	0.296	-0.03175	0.183
CELL_DEATH	0.2948	0.16	0.2498	0.206	0.2723	0.183
CROONQUIST_RAS_STROMA_DN	-0.2129	0.302	0.5148	0.064	0.15095	0.183
OLDWERNER_FIBRO_UP	-0.0533	0.348	-0.3462	0.018	-0.19975	0.183
INSULIN_NIH3T3_UP	-0.2758	0.178	-0.1794	0.188	-0.2276	0.183
CANTHARIDIN_DN	0.9396	0.001	-0.0977	0.366	0.42095	0.1835
TCELL_ANERGIC_UP	-0.187	0.08	0.1437	0.288	-0.02165	0.184
LEE_CIP_UP	-0.0696	0.276	0.2881	0.092	0.10925	0.184
IDX_TSA_DN_CLUSTER4	-0.0932	0.3	-0.2991	0.068	-0.19615	0.184
LIZUKA_G1_SM_G2	0.1225	0.26	-0.4573	0.108	-0.1674	0.184
HSC_LTHSC_SHARED	-0.1496	0.018	0.066	0.352	-0.0418	0.185
HSC_LTHSC_FETAL	-0.1496	0.018	0.066	0.352	-0.0418	0.185
GH_EXOGENOUS_ALL_UP	-0.2476	0.028	0.0937	0.342	-0.07695	0.185
DORSAM_HOXA9_DN	-0.081	0.354	-0.6406	0.016	-0.3608	0.185
HIVNEFPATHWAY	-0.1635	0.256	-0.2522	0.114	-0.20785	0.185
SCHRAETS_MLL_UP	-0.1136	0.3	0.3395	0.07	0.11295	0.185
GATA3PATHWAY	0.1739	0.306	-0.4455	0.064	-0.1358	0.185
LAL_KO_3MO_UP	-0.2236	0.162	0.2103	0.208	-0.00665	0.185
VERNELL_PRB_CLSTR1	0.158	0.254	-0.3535	0.118	-0.09775	0.186
CMV_HCMV_TIMECOURSE_18HRS_DN	-0.3723	0.09	0.1734	0.282	-0.09945	0.186
CAMPTOTHECIN_PROBCELL_DN	0.1273	0.282	-0.4496	0.092	-0.16115	0.187
STURLA_SONIC_HEDGEHOG	0.1441	0.21	-0.2589	0.164	-0.0574	0.187
HDACI_COLON_CLUSTER6	0.0795	0.264	-0.2825	0.11	-0.1015	0.187
EGF_HDMEC_UP	0.299	0.06	-0.0671	0.314	0.11595	0.187
CHIARETTI_T_ALL	-0.1839	0.082	-0.0552	0.292	-0.11955	0.187
GH_GHRHR_KO_6HRS_DN	-0.0851	0.27	-0.294	0.104	-0.18955	0.187
UVB_NHEK1_C6	-0.0384	0.354	-0.4047	0.022	-0.22155	0.188
LEI_HOXC8_DN	0.3918	0.138	0.2501	0.238	0.32095	0.188
NOS1PATHWAY	-0.094	0.34	-0.3443	0.038	-0.21915	0.189
AGUIRRE_PANCREAS_CHR19	-0.203	0.166	0.2118	0.212	0.0044	0.189
ST_FAS_SIGNALING_PATHWAY	-0.0853	0.244	-0.1188	0.134	-0.10205	0.189
CHEN_HOXA5_TARGETS_DN	0.146	0.182	0.2501	0.196	0.19805	0.189
ET743_HELA_DN	-0.25	0.206	-0.2595	0.172	-0.25475	0.189
CANCER_UNDIFFERENTIATED_META_UP	0.7105	0.014	0.1107	0.366	0.4106	0.19
KENNY_WNT_UP	0.1117	0.176	-0.1201	0.204	-0.0042	0.19
WILLERT_WNT_NCCIT_ALL_UP	0.1656	0.21	-0.2356	0.17	-0.035	0.19
HUMAN_TISSUE_THYMUS	-0.3858	0.118	-0.1576	0.262	-0.2717	0.19
FLECHNER_KIDNEY_TRANSPLANT_WELL_PBL_UP	0.0912	0.096	-0.1128	0.286	-0.0108	0.191
UVB_NHEK3_C0	0.3586	0.058	-0.1347	0.324	0.11195	0.191
HUMAN_TISSUE_PLACENTA	0.1749	0.25	0.598	0.132	0.38645	0.191
HDACI_COLON_TSABUT_DN	0.1549	0.262	-0.4243	0.12	-0.1347	0.191
UVC_HIGH_ALL_DN	-0.0245	0.378	-0.4171	0.006	-0.2208	0.192
GLUTATHIONE_METABOLISM	0.4745	0.024	0.0901	0.36	0.2823	0.192
GLYCEROLIPID_METABOLISM	0.1055	0.296	0.2401	0.088	0.1728	0.192
TAKEDA_NUP8_HOXA9_8D_DN	-0.0967	0.202	0.1661	0.182	0.0347	0.192
BYSTRYKH_HSC_CIS_GLOCUS	0.0789	0.24	-0.1856	0.146	-0.05335	0.193
ROSS_CBF	0.0953	0.286	0.1977	0.1	0.1465	0.193
RAY_P210_DIFF	-0.2593	0.052	0.0936	0.334	-0.08285	0.193
RASPATHWAY	0.1443	0.172	-0.1698	0.214	-0.01275	0.193
BUT_TSA_UP	0.4702	0.03	0.1032	0.356	0.2867	0.193
G2PATHWAY	0.4629	0.068	0.0961	0.318	0.2795	0.193
AT1RPATHWAY	-0.1444	0.294	-0.274	0.094	-0.2092	0.194
ROSS_AML1_ETO	-0.0324	0.362	0.2582	0.026	0.1129	0.194
LEE_ACOX1_DN	0.1733	0.258	0.2861	0.13	0.2297	0.194
MOOTHA_VOXPHOS	0.7915	0.001	0.1047	0.388	0.4481	0.1945
PITX2PATHWAY	-0.1873	0.198	-0.2611	0.192	-0.2242	0.195
SIG_PIP3_SIGNALING_IN_CARDIAC_MYOCTES	0.07	0.276	-0.2299	0.114	-0.07995	0.195
ADDYA_K562_HEMIN_TREATMENT	-0.1517	0.184	0.1142	0.206	-0.01875	0.195
CMV_HCMV_TIMECOURSE_12HRS_DN	-0.3438	0.156	-0.1998	0.234	-0.2718	0.195
MENSE_HYPOXIA_UP	-0.1146	0.306	-0.2183	0.084	-0.16645	0.195
HOFMANN_MANTEL_LYMPHOMA_VS_LYMPH_NODES_DN	-0.2259	0.078	0.1064	0.314	-0.05975	0.196
SHEPARD_BMYB_MORPHOLINO_UP	0.1035	0.06	0.0263	0.332	0.0649	0.196
AS3_FIBRO_C1	0.1559	0.158	0.165	0.234	0.16045	0.196
AS3_FIBRO_C2	0.1559	0.158	0.165	0.234	0.16045	0.196
OXSTRESS_RPE_H2O2TBH_DN	0.1559	0.158	0.165	0.234	0.16045	0.196
SCHURINGA_STAT5A_DN	-0.9394	0.002	-0.0546	0.39	-0.497	0.196
GREENBAUM_E2A_UP	0.3511	0.152	0.1929	0.24	0.272	0.196
HSC_MATURE_SHARED	0.0247	0.282	-0.1631	0.112	-0.0692	0.197
ALCALAY_AML_NPMC_DN	0.1757	0.038	0.0388	0.356	0.10725	0.197
RAC1PATHWAY	-0.1476	0.246	-0.2994	0.148	-0.2235	0.197
UVC_TTD_8HR_UP	-0.3485	0.086	0.1365	0.308	-0.106	0.197
STOSSI_ER_UP	0.2534	0.162	0.1156	0.232	0.1845	0.197
AGED_MOUSE_RETINA_ANY_UP	0.2496	0.298	0.2576	0.098	0.2536	0.198
GLYCOSPHINGOLIPID_METABOLISM	-0.0853	0.298	-0.2755	0.098	-0.1804	0.198
UVB_NHEK3_ALL	0.0846	0.124	-0.0996	0.272	-0.0075	0.198
CHREBPPATHWAY	-0.0509	0.394	-1.0441	0.002	-0.5475	0.198
TNFALPHA_TGZ_ADIP_UP	-0.2477	0.24	0.3134	0.156	0.03285	0.198
VANTVEER_BREAST_OUTCOME_GOOD_VS_POOR_DN	0.3728	0.072	0.0802	0.326	0.2265	0.199
HDACI_COLON_SUL_DN	-0.0552	0.238	-0.1074	0.162	-0.0813	0.2
H2O2_CSBCOMBINED	0.452	0.05	-0.1281	0.354	0.16195	0.202
IFN_BETA_GLIOMA_DN	0.5367	0.01	0.0526	0.394	0.29465	0.202
BYSTRYKH_HSC_BRAIN_CIS_GLOCUS	0.124	0.194	0.2091	0.21	0.16655	0.202
CELL_CYCLE	0.2645	0.138	-0.0983	0.266	0.0831	0.202
BRCA1_MES_UP	0.2987	0.078	0.0805	0.326	0.1896	0.202
CMV_HCMV_TIMECOURSE_24HRS_UP	-0.1514	0.168	0.0762	0.236	-0.0376	0.202
CACAMPATHWAY	-0.1473	0.292	-0.2431	0.114	-0.1952	0.203
YU_CMYC_UP	0.3836	0.156	-0.2389	0.25	0.07235	0.203
4NQO_ESR_WS_UNREG	0.1163	0.212	-0.1146	0.194	0.00085	0.203
TPA_RESIST_MIDDLE_UP	0.0824	0.204	-0.0933	0.202	-0.00545	0.203
KERATINOCYTEPATHWAY	-0.2473	0.168	-0.1407	0.238	-0.194	0.203
CANCER_NEOPLASTIC_META_UP	0.4011	0.054	0.1137	0.354	0.2574	0.204
BRENTANI_PROTEIN_MODIFICATION	-0.043	0.354	-0.2165	0.054	-0.12975	0.204
SASAKI_ATL_UP	0.1856	0.094	-0.0739	0.314	0.05585	0.204
SASAKI_TCELL_LYMPHOMA_VS_CD4_UP	0.1856	0.094	-0.0739	0.314	0.05585	0.204
H2O2_CSBRESCUED_UP	0.243	0.064	-0.0335	0.346	0.10475	0.205
CORTEX_ENRICHMENT_LATE_UP	-0.0418	0.406	0.7361	0.004	0.34715	0.205
JECHLINGER_EMT_DN	-0.2262	0.126	0.1354	0.286	-0.0454	0.206
PENG_LEUCINE_DN	0.3621	0.078	0.0842	0.334	0.22315	0.206
ZHAN_MM_CD138_PR_VS_REST	0.5167	0.136	0.2101	0.276	0.3634	0.206
GH_EXOGENOUS_ANY_DN	-0.0481	0.28	0.2004	0.132	0.07615	0.206
TARTE_BCELL	-0.5248	0.132	-0.1635	0.282	-0.34415	0.207
TNFALPHA_30MIN_UP	0.081	0.238	0.1501	0.176	0.11555	0.207
UVC_HIGH_D4_DN	-0.0629	0.332	-0.394	0.082	-0.22845	0.207
TZD_ADIP_DN	-0.1704	0.258	0.2544	0.156	0.042	0.207
DNA_REPLICATION_REACTOME	0.2322	0.12	0.124	0.296	0.1781	0.208
LVAD_HEARTFAILURE_DN	-0.1784	0.194	0.2367	0.222	0.02915	0.208
HDACI_COLON_BUT30MIN_DN	-0.0254	0.402	-0.5331	0.014	-0.27925	0.208
ELECTRON_TRANSPORT_CHAIN	0.7737	0.001	0.0817	0.416	0.4277	0.2085
PGC	0.2873	0.001	-0.0193	0.416	0.134	0.2085
NO1PATHWAY	-0.1931	0.074	-0.0672	0.344	-0.13015	0.209
TRKAPATHWAY	-0.3748	0.172	-0.1541	0.246	-0.26445	0.209
GNATENKO_PLATELET	0.5549	0.008	-0.0453	0.41	0.2548	0.209
GNATENKO_PLATELET_UP	0.5549	0.008	-0.0453	0.41	0.2548	0.209
ZHAN_MM_CD1_VS_CD2_DN	-0.2568	0.064	-0.0687	0.354	-0.16275	0.209
MYOD_BRG1_UP	-0.0808	0.342	0.5281	0.076	0.22365	0.209
MOREAUX_TACI_HI_VS_LOW_UP	-0.066	0.234	0.2275	0.186	0.08075	0.21
CARIES_PULP_DN	-0.1743	0.22	0.2331	0.2	0.0294	0.21
CCR3PATHWAY	-0.1335	0.356	-0.44	0.064	-0.28675	0.21
TARTE_MATURE_PC	-0.0792	0.294	0.2428	0.128	0.0818	0.211
CMV_HCMV_6HRS_UP	-0.7848	0.004	0.0414	0.418	-0.3717	0.211
ZHAN_TONSIL_PCBC	-0.2872	0.088	-0.0942	0.334	-0.1907	0.211
ROS_MOUSE_AORTA_DN	0.1435	0.226	0.134	0.196	0.13875	0.211
AGED_RHESUS_DN	0.1423	0.058	0.0394	0.366	0.09085	0.212
CREB_BRAIN_2WKS_UP	-0.3583	0.002	-0.0088	0.422	-0.18355	0.212
ZELLER_MYC_UP	0.5124	0.054	-0.1245	0.37	0.19395	0.212
HBX_NL_DN	-0.2637	0.298	-0.3147	0.126	-0.2892	0.212
FRUCTOSE_AND_MANNOSE_METABOLISM	-0.2937	0.108	0.1074	0.316	-0.09315	0.212
CANCERDRUGS_PROBCELL_UP	0.1536	0.226	-0.2284	0.198	-0.0374	0.212
PENG_LEUCINE_UP	-0.329	0.056	0.0474	0.37	-0.1408	0.213
CMV_UV-CMV_COMMON_HCMV_6HRS_UP	-0.9263	0.004	0.0403	0.422	-0.443	0.213
SHEPARD_CELL_PROLIFERATION	-0.026	0.342	0.1051	0.084	0.03955	0.213
CELL_PROLIFERATION	-0.026	0.342	0.1051	0.084	0.03955	0.213
VERNELL_PRB_CLSTR2	-0.1517	0.306	-0.3453	0.122	-0.2485	0.214
PROPANOATE_METABOLISM	0.2502	0.118	0.1097	0.31	0.17995	0.214
SHEPARD_CRASH_AND_BURN_MUT_VS_WT_UP	0.1539	0.088	0.0329	0.34	0.0934	0.214
ABRAHAM_MM_VS_AL_DN	0.2416	0.234	0.256	0.194	0.2488	0.214
CITRATE_CYCLE_TCA_CYCLE	0.2786	0.162	-0.1173	0.266	0.08065	0.214
ET743_SARCOMA_UP	0.1713	0.148	0.1137	0.282	0.1425	0.215
DAVIES_N	-0.6639	0.02	0.0643	0.41	-0.2998	0.215
STAEGE_EFTS_UP	-0.1282	0.22	0.1451	0.21	0.00845	0.215
GERY_CEBP_TARGETS	-0.1428	0.238	0.1286	0.192	-0.0071	0.215
4NQO_UNIQUE_FIBRO_UP	-0.1024	0.372	0.3473	0.06	0.12245	0.216
NOUZOVA_CPG_METHLTD	-0.0568	0.306	0.1871	0.126	0.06515	0.216
HADDAD_HSC_CD10_UP	-0.1536	0.06	-0.0369	0.372	-0.09525	0.216
RIBAVIRIN_RSV_DN	-0.0725	0.368	-0.2049	0.064	-0.1387	0.216
VHL_RCC_UP	-0.1289	0.088	-0.0753	0.346	-0.1021	0.217
TPOPATHWAY	-0.3384	0.136	-0.1285	0.298	-0.23345	0.217
ADIPOGENESIS_HMSC_CLASS1_UP	-0.0973	0.37	0.4634	0.064	0.18305	0.217
VEGF_MMMEC_3HRS_UP	-0.063	0.38	0.2551	0.054	0.09605	0.217
CELL_CYCLE_REGULATOR	0.2067	0.164	-0.1371	0.27	0.0348	0.217
SHEPARD_POS_REG_OF_CELL_PROLIFERATION	0.0973	0.194	0.1436	0.242	0.12045	0.218
OLDAGE_DN	0.5108	0.056	-0.0993	0.38	0.20575	0.218
HASLINGER_B_CLL_11Q23	-0.1535	0.246	-0.2572	0.19	-0.20535	0.218
MENSSEN_MYC_UP	0.7354	0.01	-0.0416	0.426	0.3469	0.218
UVC_XPCS_8HR_DN	-0.0134	0.428	-0.5428	0.008	-0.2781	0.218
HASLINGER_B_CLL_MUTATED	-0.3233	0.148	0.1036	0.29	-0.10985	0.219
IDX_TSA_UP_CLUSTER5	0.4237	0.002	-0.0311	0.436	0.1963	0.219
FLOTHO_CASP8AP2_MRD_DIFF	-0.1066	0.214	-0.1616	0.224	-0.1341	0.219
MIDDLEAGE_DN	0.5172	0.118	0.1912	0.32	0.3542	0.219
CELL_ADHESION	-0.0683	0.304	0.2278	0.134	0.07975	0.219
UVB_NHEK3_C6	-0.162	0.244	-0.1263	0.194	-0.14415	0.219
CARIES_PULP_HIGH_UP	-0.1195	0.334	0.2624	0.104	0.07145	0.219
BCNU_GLIOMA_MGMT_48HRS_DN	-0.1233	0.166	0.2168	0.272	0.04675	0.219
SA_CASPASE_CASCADE	-0.1928	0.266	-0.2313	0.174	-0.21205	0.22
SERUM_FIBROBLAST_CORE_UP	0.3229	0.024	0.0334	0.416	0.17815	0.22
CERAMIDEPATHWAY	-0.0957	0.344	-0.431	0.096	-0.26335	0.22
HSC_MATURE_FETAL	0.0203	0.302	-0.1189	0.138	-0.0493	0.22
LE_MYELIN_DN	-0.0361	0.4	0.3036	0.04	0.13375	0.22
HASLINGER_B_CLL_17P13	0.2002	0.112	-0.1093	0.328	0.04545	0.22
AKTPATHWAY	-0.0631	0.37	-0.4707	0.07	-0.2669	0.22
OXSTRESS_RPE_HNETBH_DN	0.1328	0.22	0.1157	0.22	0.12425	0.22
LU_IL4BCELL	-0.2953	0.142	0.0714	0.3	-0.11195	0.221
GLYCOGEN_METABOLISM	-0.1511	0.12	-0.0586	0.322	-0.10485	0.221
UCALPAINPATHWAY	0.1416	0.24	-0.222	0.202	-0.0402	0.221
PYRIMIDINE_METABOLISM	0.3208	0.07	0.0604	0.372	0.1906	0.221
CROONQUIST_IL6_RAS_DN	0.3917	0.162	0.2363	0.282	0.314	0.222
CISPLATIN_PROBCELL_UP	-0.3403	0.082	-0.1422	0.362	-0.24125	0.222
CMV_HCMV_TIMECOURSE_20HRS_UP	-0.1619	0.208	-0.1078	0.238	-0.13485	0.223
CMV-UV_HCMV_6HRS_UP	-0.3591	0.034	0.0119	0.412	-0.1736	0.223
PROTEASOME_DEGRADATION	0.536	0.05	0.0984	0.396	0.3172	0.223
H2O2_CSBRESCUED_C1_UP	0.2566	0.048	0.0312	0.398	0.1439	0.223
FETAL_LIVER_VS_ADULT_LIVER_GNF2	-0.0427	0.386	0.4193	0.06	0.1883	0.223
CALRES_MOUSE_NEOCORTEX_DN	-0.0387	0.31	-0.1161	0.136	-0.0774	0.223
G1_TO_S_CELL_CYCLE_REACTOME	0.2388	0.062	-0.063	0.384	0.0879	0.223
AGUIRRE_PANCREAS_CHR22	-0.049	0.386	0.4757	0.06	0.21335	0.223
HOFFMANN_BIVSBII_BI_TABLE2	0.1379	0.162	0.0858	0.286	0.11185	0.224
PASSERINI_IMMUNE	-0.3041	0.124	0.0879	0.324	-0.1081	0.224
LIAN_MYELOID_DIFF_RECEPTORS	-0.0738	0.38	0.4607	0.068	0.19345	0.224
FLECHNER_KIDNEY_TRANSPLANT_REJECTION_PBL_DN	0.0983	0.172	-0.1439	0.276	-0.0228	0.224
NUCLEOTIDE_METABOLISM	0.3901	0.106	-0.1656	0.344	0.11225	0.225
ALANINE_AND_ASPARTATE_METABOLISM	0.2116	0.09	0.054	0.362	0.1328	0.226
KNUDSEN_PMNS_DN	-0.0967	0.238	-0.2127	0.214	-0.1547	0.226
IDX_TSA_DN_CLUSTER1	0.243	0.15	0.1038	0.302	0.1734	0.226
CHESLER_BRAIN_ONLY_SUBSET	-0.2395	0.2	0.1867	0.252	-0.0264	0.226
O6BG_RESIST_MEDULLOBLASTOMA_DN	-0.0429	0.334	-0.1997	0.118	-0.1213	0.226
HASLINGER_B_CLL_12	0.1985	0.142	-0.2263	0.312	-0.0139	0.227
COLLER_MYC_UP	0.5841	0.03	0.0535	0.424	0.3188	0.227
ARENRF2PATHWAY	-0.1154	0.348	-0.2817	0.106	-0.19855	0.227
DAC_BLADDER_UP	-0.1336	0.308	0.367	0.146	0.1167	0.227
SIG_IL4RECEPTOR_IN_B_LYPHOCYTES	-0.1356	0.342	-0.3265	0.112	-0.23105	0.227
CELL_CYCLE_KEGG	0.2056	0.168	-0.0792	0.288	0.0632	0.228
ZUCCHI_EPITHELIAL_UP	0.1906	0.174	0.105	0.282	0.1478	0.228
CHOLESTEROL_BIOSYNTHESIS	-0.3052	0.242	-0.2512	0.214	-0.2782	0.228
LVAD_HEARTFAILURE_UP	-0.1216	0.282	-0.1189	0.174	-0.12025	0.228
BRENTANI_DEATH	-0.0339	0.4	0.2171	0.056	0.0916	0.228
UEDA_MOUSE_SCN	-0.2424	0.12	-0.0513	0.336	-0.14685	0.228
HDACI_COLON_CUR12HRS_UP	-0.6008	0.014	0.0464	0.442	-0.2772	0.228
HADDAD_HPCLYMPHO_ENRICHED	-0.1497	0.064	-0.032	0.392	-0.09085	0.228
MUNSHI_MM_UP	0.1442	0.156	0.0708	0.302	0.1075	0.229
REN_E2F1_TARGETS	0.308	0.162	-0.1659	0.296	0.07105	0.229
BRENTANI_TRANSCRIPTION_FACTORS	-0.1967	0.104	0.0659	0.354	-0.0654	0.229
GLYCOLYSIS_AND_GLUCONEOGENESIS	0.1568	0.196	0.1148	0.262	0.1358	0.229
DAC_PANC_UP	-0.0554	0.328	0.2685	0.13	0.10655	0.229
BCRABL_HL60_AFFY_UP	-0.128	0.276	-0.2411	0.182	-0.18455	0.229
HBX_NL_UP	0.091	0.304	-0.2051	0.156	-0.05705	0.23
HESS_HOXAANMEIS1_UP	0.5238	0.01	-0.0157	0.45	0.25405	0.23
HESS_HOXAANMEIS1_DN	0.5238	0.01	-0.0157	0.45	0.25405	0.23
CORDERO_KRAS_KD_VS_CONTROL_DN	0.1182	0.246	0.1114	0.216	0.1148	0.231
CPR_LOW_LIVER_DN	0.1796	0.196	0.2018	0.266	0.1907	0.231
NKTPATHWAY	-0.5071	0.068	0.052	0.394	-0.22755	0.231
FERNANDEZ_MYC_TARGETS	0.2869	0.001	0.0108	0.462	0.14885	0.2315
NOUZOVA_CPG_H4_UP	0.0987	0.182	-0.1532	0.282	-0.02725	0.232
GAMMA_ESR_WS_UNREG	0.2493	0.146	-0.0697	0.318	0.0898	0.232
BRCA_PROGNOSIS_NEG	0.3368	0.094	-0.0792	0.37	0.1288	0.232
SHEPARD_NEG_REG_OF_CELL_PROLIFERATION	-0.0057	0.452	0.303	0.012	0.14865	0.232
ABRAHAM_AL_VS_MM_UP	0.2044	0.258	0.2159	0.208	0.21015	0.233
VEGF_MMMEC_ALL_UP	-0.0515	0.418	0.4008	0.048	0.17465	0.233
PTENPATHWAY	-0.1295	0.342	-0.3798	0.124	-0.25465	0.233
DNA_DAMAGE_SIGNALING	0.1321	0.174	-0.0838	0.294	0.02415	0.234
TPA_RESIST_LATE_DN	-0.0821	0.288	0.1976	0.18	0.05775	0.234
ADIP_VS_FIBRO_UP	-0.1176	0.236	0.2072	0.232	0.0448	0.234
HYPOXIA_RCC_UP	0.1137	0.09	-0.0456	0.378	0.03405	0.234
P38MAPKPATHWAY	-0.1898	0.178	-0.1185	0.29	-0.15415	0.234
IFNA_UV-CMV_COMMON_HCMV_6HRS_UP	-0.641	0.074	-0.0467	0.394	-0.34385	0.234
HDACI_COLON_CUR48HRS_UP	0.2975	0.014	0.0217	0.454	0.1596	0.234
HDACI_COLON_SUL24HRS_UP	0.1318	0.196	0.0622	0.272	0.097	0.234
IFNA_HCMV_6HRS_UP	-0.5942	0.054	-0.0428	0.416	-0.3185	0.235
UVB_NHEK1_UP	-0.0546	0.296	0.0975	0.174	0.02145	0.235
WALKER_MM_SNP_DIFF	0.1448	0.266	-0.2274	0.206	-0.0413	0.236
CELL_CYCLE_CHECKPOINT	0.2555	0.144	-0.106	0.328	0.07475	0.236
KNUDSEN_PMNS_UP	-0.2006	0.054	0.0169	0.418	-0.09185	0.236
CHESLER_HIGHEST_FOLD_RANGE_GENES	-0.0366	0.412	-0.4015	0.06	-0.21905	0.236
LEE_MYC_E2F1_DN	-0.0193	0.434	0.3648	0.038	0.17275	0.236
TSA_CD4_DN	-0.2263	0.136	0.1278	0.336	-0.04925	0.236
ZMPSTE24_KO_UP	-0.2328	0.116	0.086	0.358	-0.0734	0.237
PHOTOSYNTHESIS	-0.0705	0.308	0.2228	0.166	0.07615	0.237
WANG_HOXA9_VS_MEIS1_UP	-0.1523	0.196	0.1354	0.278	-0.00845	0.237
UBIQUINONE_BIOSYNTHESIS	1.1103	0.004	-0.0123	0.472	0.549	0.238
DNMT1_KO_DN	-0.3795	0.108	0.1646	0.368	-0.10745	0.238
AGED_RHESUS_UP	-0.0638	0.174	0.0777	0.302	0.00695	0.238
BRENTANI_SIGNALING	-0.1646	0.052	-0.0098	0.424	-0.0872	0.238
LINDSTEDT_DEND_8H_VS_48H_UP	0.1568	0.216	-0.1536	0.26	0.0016	0.238
CSKPATHWAY	-0.1156	0.324	-0.36	0.152	-0.2378	0.238
AMIPATHWAY	-0.1156	0.324	-0.36	0.152	-0.2378	0.238
ST_GAQ_PATHWAY	-0.0916	0.302	-0.1729	0.174	-0.13225	0.238
PARK_MSCS_BOTH	-0.1296	0.196	-0.2054	0.28	-0.1675	0.238
RNA_TRANSCRIPTION_REACTOME	0.5317	0.024	0.0266	0.452	0.27915	0.238
HOFFMANN_BIVSBII_LGBII	-0.0401	0.406	0.1764	0.07	0.06815	0.238
CHANG_SERUM_RESPONSE_UP	0.315	0.028	0.0118	0.448	0.1634	0.238
GLYCEROPHOSPHOLIPID_METABOLISM	0.068	0.302	0.1584	0.176	0.1132	0.239
MAPK_CASCADE	0.0861	0.286	-0.1831	0.192	-0.0485	0.239
HDACI_COLON_BUT24HRS_UP	-0.0894	0.292	0.1394	0.186	0.025	0.239
HPV31_DN	-0.1077	0.206	0.1643	0.272	0.0283	0.239
BRENTANI_DNA_METHYLATION_AND_MODIFICATION	0.3781	0.012	0.0022	0.466	0.19015	0.239
AGED_MOUSE_HYPOTH_DN	0.1144	0.2	-0.089	0.28	0.0127	0.24
TOB1PATHWAY	-0.1222	0.338	-0.26	0.142	-0.1911	0.24
DFOSB_BRAIN_2WKS_UP	0.1421	0.276	0.1445	0.204	0.1433	0.24
HIFPATHWAY	-0.0347	0.416	-0.4298	0.064	-0.23225	0.24
SANA_IFNG_ENDOTHELIAL_DN	0.5819	0.001	-0.0191	0.48	0.2814	0.2405
UVB_NHEK2_UP	0.4366	0.012	0.0318	0.47	0.2342	0.241
RUTELLA_HEPATGFSNDCS_UP	0.1624	0.172	0.1005	0.31	0.13145	0.241
FSH_HUMAN_GRANULOSA_UP	-0.2596	0.122	0.0896	0.36	-0.085	0.241
BASSO_GERMINAL_CENTER_CD40_DN	-0.1425	0.298	0.1321	0.184	-0.0052	0.241
GENOTOXINS_ALL_4HRS_REG	0.3276	0.1	-0.0528	0.384	0.1374	0.242
FLECHNER_KIDNEY_TRANSPLANT_REJECTION_PBL_UP	0.0684	0.288	-0.2518	0.2	-0.0917	0.244
OXSTRESS_RPETWO_DN	0.0994	0.158	0.0529	0.33	0.07615	0.244
DNMT1_KO_UP	0.0962	0.174	-0.0464	0.314	0.0249	0.244
IL6_SCAR_FIBRO_UP	0.3114	0.186	-0.1269	0.304	0.09225	0.245
PARK_RARALPHA_MOD	0.1392	0.188	0.1327	0.302	0.13595	0.245
CALRES_RHESUS_UP	-0.0789	0.272	0.1442	0.218	0.03265	0.245
SANSOM_APC_LOSS4_UP	0.1732	0.044	0.0089	0.448	0.09105	0.246
AGEING_KIDNEY_UP	-0.056	0.398	0.1856	0.094	0.0648	0.246
JAIN_NEMO_DIFF	0.0805	0.26	-0.1197	0.232	-0.0196	0.246
BREAST_DUCTAL_CARCINOMA_GENES	0.9659	0.02	0.0437	0.474	0.5048	0.247
LEI_MYB_REGULATED_GENES	0.1145	0.202	0.0785	0.292	0.0965	0.247
ET743_RESIST_UP	0.1432	0.256	0.1746	0.238	0.1589	0.247
COCAINE_BRAIN_5D_UP	-0.1246	0.154	0.1051	0.342	-0.00975	0.248
PROTEASOMEPATHWAY	0.5718	0.098	0.0932	0.398	0.3325	0.248
AGED_MOUSE_NEOCORTEX_UP	0.144	0.1	-0.0328	0.396	0.0556	0.248
CMV_IE86_UP	0.5742	0.066	-0.0369	0.43	0.26865	0.248
UVB_NHEK3_C3	-0.2096	0.188	-0.1079	0.308	-0.15875	0.248
H2O2_CSBDIFF_C2	0.3501	0.008	0.0041	0.488	0.1771	0.248
VEGF_HUVEC_30MIN_UP	-0.1025	0.33	0.2473	0.168	0.0724	0.249
HDACI_COLON_CURSUL_UP	-0.205	0.07	-0.0251	0.428	-0.11505	0.249
RIBOSOMAL_PROTEINS	0.3796	0.15	-0.1719	0.35	0.10385	0.25
ROSS_CBF_LEUKEMIA	-0.0601	0.392	0.1692	0.108	0.05455	0.25
POMEROY_MD_TREATMENT_GOOD_VS_POOR_DN	0.1804	0.19	-0.1094	0.31	0.0355	0.25
EDG1PATHWAY	-0.0286	0.474	-0.4657	0.026	-0.24715	0.25
ADIP_DIFF_CLUSTER5	0.5329	0.064	0.0426	0.438	0.28775	0.251
O_GLYCAN_BIOSYNTHESIS	-0.0583	0.394	-0.3223	0.108	-0.1903	0.251
ADIP_VS_PREADIP_DN	0.1836	0.23	-0.0961	0.272	0.04375	0.251
UVC_TTD-XPCS_COMMON_UP	-0.4391	0.06	-0.0104	0.442	-0.22475	0.251
ZHAN_MMPC_SIM_BC_AND_MM	0.1907	0.092	0.0448	0.41	0.11775	0.251
HDACI_COLON_BUT48HRS_UP	-0.1445	0.162	-0.0282	0.342	-0.08635	0.252
PENG_RAPAMYCIN_DN	0.2223	0.124	-0.0555	0.38	0.0834	0.252
PYK2PATHWAY	-0.0722	0.398	-0.3175	0.106	-0.19485	0.252
UVC_LOW_ALL_DN	0.2789	0.136	-0.0664	0.368	0.10625	0.252
CREB_BRAIN_8WKS_UP	0.176	0.08	0.0362	0.424	0.1061	0.252
CALRES_MOUSE_UP	-0.0908	0.288	0.1197	0.216	0.01445	0.252
HCC_SURVIVAL_GOOD_VS_POOR_UP	-0.0775	0.27	0.1974	0.236	0.05995	0.253
KIM_TH_CELLS_UP	-0.0143	0.418	-0.4527	0.088	-0.2335	0.253
XU_ATRA_UP	-0.6853	0.034	0.0826	0.472	-0.30135	0.253
HDACI_COLON_CLUSTER9	-0.3256	0.018	0.016	0.488	-0.1548	0.253
UV-CMV_UNIQUE_HCMV_6HRS_UP	-0.2707	0.092	0.0131	0.414	-0.1288	0.253
TAKEDA_NUP8_HOXA9_3D_UP	-0.3662	0.032	0.0148	0.474	-0.1757	0.253
FERRANDO_MLL_T_ALL_UP	-0.1189	0.252	0.1337	0.254	0.0074	0.253
PEPTIDE_GPCRS	-0.0734	0.354	0.3883	0.154	0.15745	0.254
CALCINEURIN_NF_AT_SIGNALING	-0.028	0.44	-0.1647	0.068	-0.09635	0.254
CMV_HCMV_TIMECOURSE_8HRS_UP	-0.7403	0.004	-0.0132	0.504	-0.37675	0.254
GH_HYPOPHYSECTOMY_RAT_DN	-0.1625	0.266	0.2864	0.242	0.06195	0.254
FMLPPATHWAY	0.0976	0.282	-0.1396	0.226	-0.021	0.254
IFNALPHA_NL_UP	-0.4097	0.126	0.1367	0.382	-0.1365	0.254
CMV_UV-CMV_COMMON_HCMV_6HRS_DN	-0.4332	0.076	0.0319	0.434	-0.20065	0.255
ANDROGEN_GENES	-0.3251	0.02	-0.0051	0.49	-0.1651	0.255
HYPERTROPHY_MODEL	-0.2272	0.182	0.0919	0.33	-0.06765	0.256
P53_SIGNALING	-0.0261	0.402	-0.1247	0.11	-0.0754	0.256
ADIP_DIFF_CLUSTER4	0.2292	0.22	0.1594	0.292	0.1943	0.256
NF90_UP	-0.4342	0.06	-0.0195	0.452	-0.22685	0.256
NGUYEN_KERATO_UP	0.1866	0.216	0.1037	0.298	0.14515	0.257
ZHAN_MMPC_SIMAL	-0.1242	0.304	0.1748	0.21	0.0253	0.257
ZHAN_MM_CD138_HP_VS_REST	-0.0251	0.454	-0.3812	0.062	-0.20315	0.258
GLUCONEOGENESIS	0.1045	0.254	0.118	0.262	0.11125	0.258
GLYCOLYSIS	0.1045	0.254	0.118	0.262	0.11125	0.258
CXCR4PATHWAY	-0.0626	0.438	-0.4592	0.078	-0.2609	0.258
STRESS_ARSENIC_SPECIFIC_DN	-0.0847	0.356	0.1472	0.16	0.03125	0.258
PDGF_ES_UP	-0.3472	0.052	0.0299	0.464	-0.15865	0.258
BREASTCA_THREE_CLASSES	0.2838	0.078	-0.0436	0.438	0.1201	0.258
OKUMURA_MC_LPS	-0.1093	0.118	-0.0352	0.398	-0.07225	0.258
ZHAN_MMPC_EARLYVS	-0.2321	0.124	-0.0585	0.392	-0.1453	0.258
CARBON_FIXATION	0.1481	0.266	0.1421	0.252	0.1451	0.259
PHENYLALANINE_METABOLISM	0.1499	0.184	0.1505	0.334	0.1502	0.259
HSC_LATEPROGENITORS_FETAL	0.0721	0.218	-0.0636	0.302	0.00425	0.26
KANNAN_P53_DN	-0.1152	0.26	0.1114	0.26	-0.0019	0.26
TCA	0.1777	0.258	0.264	0.262	0.22085	0.26
CIS_XPC_DN	-0.0045	0.468	-0.2447	0.054	-0.1246	0.261
AS3_FIBRO_C4	0.2383	0.144	-0.067	0.378	0.08565	0.261
LI_FETAL_VS_WT_KIDNEY_DN	0.2581	0.092	0.0267	0.43	0.1424	0.261
LAMB_CYCLIN_D1_UP	-0.2332	0.174	0.1099	0.35	-0.06165	0.262
PRMT5_KD_UP	0.1987	0.132	-0.0448	0.392	0.07695	0.262
YAO_P4_KO_VS_WT_DN	-0.0803	0.392	0.5021	0.132	0.2109	0.262
DORSAM_HOXA9_UP	0.1468	0.184	-0.0834	0.342	0.0317	0.263
MEF2DPATHWAY	-0.076	0.352	-0.2662	0.174	-0.1711	0.263
CMV_24HRS_UP	0.1552	0.168	-0.0935	0.358	0.03085	0.263
AGPCRPATHWAY	-0.0089	0.494	-0.7681	0.032	-0.3885	0.263
SA_PTEN_PATHWAY	-0.1334	0.416	-0.4696	0.11	-0.3015	0.263
PARK_RARALPHA_UP	-0.1529	0.242	0.164	0.284	0.00555	0.263
FASPATHWAY	-0.0381	0.49	-0.4162	0.038	-0.22715	0.264
HDACI_COLON_TSA_DN	-0.0528	0.334	-0.1833	0.194	-0.11805	0.264
HSC_LATEPROGENITORS_ADULT	0.077	0.202	-0.0594	0.328	0.0088	0.265
HSC_LATEPROGENITORS_SHARED	0.0758	0.208	-0.0598	0.322	0.008	0.265
HIPPOCAMPUS_DEVELOPMENT_PRENATAL	0.2658	0.09	-0.0644	0.44	0.1007	0.265
TARTE_PLASMA_BLASTIC	0.4188	0.054	0.0048	0.476	0.2118	0.265
ADIPOGENESIS_HMSC_CLASS3_UP	-0.2141	0.082	-0.0259	0.448	-0.12	0.265
POMEROY_DESMOPLASIC_VS_CLASSIC_MD_DN	-0.1757	0.13	-0.0367	0.4	-0.1062	0.265
IRITANI_ADPROX_UP	0.1986	0.216	0.0984	0.314	0.1485	0.265
UVB_NHEK3_C8	0.1097	0.292	0.074	0.238	0.09185	0.265
TPA_RESIST_EARLY_DN	-0.0631	0.304	0.1105	0.226	0.0237	0.265
BCNU_GLIOMA_NOMGMT_48HRS_UP	-0.0511	0.388	0.2518	0.144	0.10035	0.266
BRENTANI_CELL_CYCLE	0.2174	0.092	0.0266	0.44	0.122	0.266
UVC_XPCS_8HR_UP	-0.285	0.008	0.0176	0.524	-0.1337	0.266
ROS_MOUSE_AORTA_UP	0.3621	0.034	0.0047	0.5	0.1834	0.267
AGUIRRE_PANCREAS_CHR6	0.128	0.296	-0.2319	0.238	-0.05195	0.267
IDX_TSA_DN_CLUSTER6	-0.025	0.486	-0.6469	0.048	-0.33595	0.267
METPATHWAY	-0.0357	0.436	-0.3187	0.098	-0.1772	0.267
P21_ANY_DN	0.1638	0.248	-0.1488	0.286	0.0075	0.267
HSC_STHSC_ADULT	-0.0128	0.398	0.2113	0.136	0.09925	0.267
DAVIES_MGUS_MM	-0.0319	0.426	0.2876	0.11	0.12785	0.268
GCRPATHWAY	-0.0576	0.418	-0.3717	0.12	-0.21465	0.269
YAGI_AML_PROGNOSIS	0.231	0.06	-0.0024	0.478	0.1143	0.269
RUIZ_TENASCIN_TARGETS	-0.0299	0.408	0.1934	0.13	0.08175	0.269
UVC_TTD_8HR_DN	-0.0024	0.494	-0.3107	0.044	-0.15655	0.269
SIG_PIP3_SIGNALING_IN_B_LYMPHOCYTES	-0.0752	0.388	-0.2951	0.15	-0.18515	0.269
5FU_RESIST_GASTRIC_UP	0.3144	0.184	-0.0808	0.354	0.1168	0.269
UVC_TTD_ALL_UP	-0.1726	0.176	0.1331	0.366	-0.01975	0.271
NADLER_OBESITY_UP	-0.028	0.452	0.3936	0.09	0.1828	0.271
AGEING_BRAIN_DN	-0.0868	0.166	-0.0449	0.378	-0.06585	0.272
DISTECHE_XINACTIVATED_GENES	-0.1868	0.242	-0.1506	0.302	-0.1687	0.272
PYRUVATE_METABOLISM	0.3604	0.084	-0.0127	0.46	0.17385	0.272
VALINE_LEUCINE_AND_ISOLEUCINE_DEGRADATION	0.3508	0.086	-0.0221	0.458	0.16435	0.272
MMS_HUMAN_LYMPH_HIGH_24HRS_UP	0.348	0.14	-0.028	0.404	0.16	0.272
HDACI_COLON_CUR_DN	-0.0536	0.318	-0.1389	0.226	-0.09625	0.272
CROONQUIST_IL6_STARVE_UP	0.4009	0.182	0.1576	0.362	0.27925	0.272
ADIP_VS_PREADIP_UP	-0.1379	0.14	0.0683	0.406	-0.0348	0.273
POMEROY_DESMOPLASIC_VS_CLASSIC_MD_UP	0.1149	0.266	-0.1493	0.28	-0.0172	0.273
DAC_FIBRO_UP	-0.1818	0.302	0.2925	0.244	0.05535	0.273
HEMATOPOESIS_RELATED_TRANSCRIPTION_FACTORS	-0.1367	0.172	0.0741	0.376	-0.0313	0.274
VEGF_MMMEC_6HRS_UP	-0.0123	0.478	0.5823	0.07	0.285	0.274
PROSTAGLANDIN_SYNTHESIS_REGULATION	-0.1817	0.192	0.0977	0.356	-0.042	0.274
EMT_UP	-0.0221	0.446	0.3169	0.102	0.1474	0.274
BRG1_SW13_UP	-0.0052	0.492	0.3335	0.056	0.16415	0.274
HSIAO_LIVER_SPECIFIC_GENES	-0.0382	0.392	0.2655	0.158	0.11365	0.275
SPPAPATHWAY	-0.1164	0.39	-0.2176	0.16	-0.167	0.275
IL7PATHWAY	-0.0575	0.45	-0.4998	0.1	-0.27865	0.275
BLOOD_CLOTTING_CASCADE	-0.0946	0.366	0.4852	0.186	0.1953	0.276
REOVIRUS_HEK293_DN	0.0312	0.306	-0.0674	0.246	-0.0181	0.276
YAGI_AML_PROG_ASSOC	-0.1029	0.06	-0.0091	0.492	-0.056	0.276
DER_IFNB_UP	-0.0267	0.446	-0.3774	0.106	-0.20205	0.276
HOGERKORP_CD44_DN	-0.1501	0.272	-0.1547	0.28	-0.1524	0.276
BASSO_REGULATORY_HUBS	0.1269	0.202	-0.0733	0.354	0.0268	0.278
XU_CBP_DN	0.0849	0.268	0.0979	0.288	0.0914	0.278
GPCRDB_CLASS_A_RHODOPSIN_LIKE	-0.0116	0.478	0.4414	0.08	0.2149	0.279
IL12PATHWAY	-0.2863	0.164	0.0579	0.394	-0.1142	0.279
TAKEDA_NUP8_HOXA9_8D_UP	-0.1992	0.188	0.1052	0.37	-0.047	0.279
TRNA_SYNTHETASES	-0.2074	0.284	-0.2714	0.274	-0.2394	0.279
ROME_INSULIN_2F_DN	-0.1238	0.29	-0.1102	0.27	-0.117	0.28
BRCA2_BRCA1_DN	-0.213	0.06	-0.0156	0.5	-0.1143	0.28
CCR5PATHWAY	-0.0706	0.424	-0.2106	0.136	-0.1406	0.28
IFNALPHA_NL_HCC_UP	-0.2402	0.216	0.1663	0.344	-0.03695	0.28
ST_ERK1_ERK2_MAPK_PATHWAY	-0.0863	0.31	-0.1352	0.25	-0.11075	0.28
SANSOM_APC_5_DN	-0.0257	0.444	0.179	0.118	0.07665	0.281
MYOD_NIH3T3_DN	-0.1775	0.096	-0.0049	0.466	-0.0912	0.281
TAKEDA_NUP8_HOXA9_16D_DN	-0.0421	0.306	-0.0843	0.256	-0.0632	0.281
PENG_GLUTAMINE_DN	0.2995	0.082	0.0051	0.482	0.1523	0.282
HADDAD_HSC_CD7_DN	-0.1174	0.262	-0.1379	0.302	-0.12765	0.282
HADDAD_CD45CD7_PLUS_VS_MINUS_DN	-0.1174	0.262	-0.1379	0.302	-0.12765	0.282
BCNU_GLIOMA_MGMT_48HRS_UP	0.0955	0.242	0.1096	0.322	0.10255	0.282
GAMMA-UV_FIBRO_UP	-0.036	0.404	-0.1531	0.162	-0.09455	0.283
UVB_NHEK1_C1	0.1756	0.146	0.0356	0.422	0.1056	0.284
CELL_GROWTH_AND_OR_MAINTENANCE	0.266	0.098	-0.0094	0.47	0.1283	0.284
IL2RBPATHWAY	-0.1415	0.294	-0.085	0.274	-0.11325	0.284
SERUM_FIBROBLAST_CELLCYCLE	0.2676	0.156	0.0464	0.414	0.157	0.285
AGED_MOUSE_MUSCLE_DN	-0.0013	0.492	-0.2064	0.078	-0.10385	0.285
ESR_FIBROBLAST_UP	0.1266	0.26	-0.0638	0.312	0.0314	0.286
N_GLYCAN_BIOSYNTHESIS	-0.399	0.122	-0.0304	0.45	-0.2147	0.286
IGLESIAS_E2FMINUS_UP	0.208	0.19	0.0385	0.384	0.12325	0.287
BRCA_PROGNOSIS_POS	0.1378	0.202	0.0509	0.372	0.09435	0.287
TARTE_PC	-0.274	0.178	-0.009	0.396	-0.1415	0.287
LYSINE_DEGRADATION	0.1032	0.294	-0.1014	0.28	0.0009	0.287
NING_COPD_UP	0.1627	0.104	-0.0047	0.472	0.079	0.288
CREB_BRAIN_8WKS_DN	-0.141	0.16	-0.0268	0.416	-0.0839	0.288
VERHAAK_AML_NPM1_MUT_VS_WT_UP	-0.0662	0.412	0.2418	0.164	0.0878	0.288
IFN_ALL_UP	-0.1808	0.286	0.1817	0.292	0.00045	0.289
HOFFMANN_BIVSBII_BI	-0.1104	0.16	0.0304	0.42	-0.04	0.29
EGF_RECEPTOR_SIGNALING_PATHWAY	-0.1306	0.322	-0.1658	0.258	-0.1482	0.29
CASPASEPATHWAY	-0.1741	0.222	0.0874	0.36	-0.04335	0.291
BIOSYNTHESIS_OF_STEROIDS	-0.2013	0.284	-0.186	0.298	-0.19365	0.291
SHIPP_FL_VS_DLBCL_UP	-0.0196	0.472	-0.2821	0.11	-0.15085	0.291
DSRNA_UP	-0.1791	0.308	-0.1606	0.276	-0.16985	0.292
BENNETT_SLE_UP	-0.3089	0.196	-0.0392	0.388	-0.17405	0.292
TPA_SENS_LATE_DN	0.0519	0.146	0.0115	0.44	0.0317	0.293
SANSOM_APC_4_DN	-0.0126	0.468	0.3141	0.118	0.15075	0.293
BRCA1KO_MEF_DN	-0.0188	0.4	-0.2524	0.186	-0.1356	0.293
BYSTRYKH_HSC_BRAIN_TRANS_GLOCUS	0.0343	0.25	0.037	0.336	0.03565	0.293
HOX_GENES	-0.1411	0.26	0.1129	0.326	-0.0141	0.293
MTORPATHWAY	-0.012	0.52	-0.4637	0.066	-0.23785	0.293
IFN_BETA_UP	-0.013	0.496	-0.3697	0.092	-0.19135	0.294
CDMACPATHWAY	-0.0934	0.41	-0.2285	0.178	-0.16095	0.294
TGZ_ADIP_UP	0.3746	0.124	0.0585	0.464	0.21655	0.294
INTEGRINPATHWAY	-0.0421	0.408	-0.181	0.184	-0.11155	0.296
CELL_MOTILITY	0.1214	0.118	0.0175	0.474	0.06945	0.296
IRS1_KO_ADIP_UP	-0.0211	0.43	0.1012	0.162	0.04005	0.296
STRESSPATHWAY	-0.0761	0.416	-0.2204	0.176	-0.14825	0.296
BCL2_FAMILY_AND_REG_NETWORK	0.3449	0.086	0.029	0.506	0.18695	0.296
HBX_HEP_UP	-0.1123	0.322	-0.19	0.27	-0.15115	0.296
TH1TH2PATHWAY	-0.4964	0.148	0.0387	0.446	-0.22885	0.297
UVB_NHEK1_C2	-0.0969	0.408	0.2171	0.186	0.0601	0.297
LIN_WNT_UP	-0.1455	0.2	-0.0347	0.394	-0.0901	0.297
GLYCINE_SERINE_AND_THREONINE_METABOLISM	-0.2204	0.126	-0.0091	0.47	-0.11475	0.298
OLDWERNER_FIBRO_DN	0.0837	0.152	-0.0265	0.444	0.0286	0.298
BCNU_GLIOMA_NOMGMT_24HRS_UP	0.3847	0.084	-0.008	0.512	0.18835	0.298
GALINDO_ACT_UP	-0.1274	0.25	0.1049	0.346	-0.01125	0.298
ANDROGEN_AND_ESTROGEN_METABOLISM	-0.3464	0.066	0.0118	0.53	-0.1673	0.298
HSC_INTERMEDIATEPROGENITORS_ADULT	0.081	0.17	0.0138	0.428	0.0474	0.299
GH_GHRHR_KO_24HRS_UP	-0.0794	0.202	-0.0601	0.396	-0.06975	0.299
LEE_MYC_DN	-0.0366	0.416	0.214	0.186	0.0887	0.301
TOLLPATHWAY	-0.0546	0.418	-0.185	0.184	-0.1198	0.301
HDACI_COLON_TSA2HRS_DN	-0.1032	0.32	-0.144	0.282	-0.1236	0.301
JECHLINGER_EMT_UP	-0.0069	0.496	0.2668	0.106	0.12995	0.301
NKCELLSPATHWAY	-0.0063	0.508	-0.5875	0.094	-0.2969	0.301
HDACI_COLON_CUR24HRS_UP	-0.1668	0.184	0.0427	0.42	-0.06205	0.302
AGUIRRE_PANCREAS_CHR7	0.1058	0.176	0.0282	0.428	0.067	0.302
PENG_RAPAMYCIN_UP	-0.1769	0.146	-0.0017	0.458	-0.0893	0.302
HTERT_DN	-0.013	0.482	0.3281	0.124	0.15755	0.303
SHIPP_DLBCL_CURED_DN	-0.0488	0.388	-0.1343	0.218	-0.09155	0.303
CREBPATHWAY	-0.0189	0.516	-0.3756	0.09	-0.19725	0.303
SIG_BCR_SIGNALING_PATHWAY	-0.0594	0.454	-0.2269	0.152	-0.14315	0.303
ASTON_DEPRESSION_DN	-0.018	0.458	0.1813	0.15	0.08165	0.304
FERRARI_4HPR_UP	-0.3013	0.16	-0.026	0.448	-0.16365	0.304
LE_MYELIN_UP	0.2441	0.112	-0.0019	0.496	0.1211	0.304
ALCALAY_AML_NPMC_UP	0.1058	0.272	0.0949	0.336	0.10035	0.304
MITOCHONDRIAPATHWAY	0.1932	0.172	-0.0457	0.438	0.07375	0.305
ZUCCHI_EPITHELIAL_DN	-0.0598	0.32	0.0764	0.29	0.0083	0.305
PORPHYRIN_AND_CHLOROPHYLL_METABOLISM	0.2643	0.142	-0.0224	0.468	0.12095	0.305
AGUIRRE_PANCREAS_CHR18	-0.0284	0.408	-0.1871	0.202	-0.10775	0.305
DOX_RESIST_GASTRIC_UP	0.4844	0.148	0.0234	0.462	0.2539	0.305
WANG_MLL_CBP_VS_GMP_DN	0.281	0.11	0.0022	0.5	0.1416	0.305
FALT_BCLL_IG_MUTATED_VS_WT_DN	0.0903	0.204	0.0356	0.408	0.06295	0.306
TESTIS_EXPRESSED_GENES	-0.0676	0.264	0.1379	0.35	0.03515	0.307
TGFBETA_C1_UP	0.2097	0.27	0.1325	0.344	0.1711	0.307
NFKBPATHWAY	-0.2822	0.254	-0.063	0.36	-0.1726	0.307
ACHPATHWAY	-0.1175	0.374	0.2675	0.244	0.075	0.309
APOPTOSIS_GENMAPP	-0.0871	0.364	-0.1543	0.254	-0.1207	0.309
BIOPEPTIDESPATHWAY	-0.0754	0.336	-0.0885	0.282	-0.08195	0.309
BAF57_BT549_UP	-0.0837	0.37	0.161	0.248	0.03865	0.309
ROSS_CBF_MYH	0.179	0.222	0.05	0.396	0.1145	0.309
SANA_TNFA_ENDOTHELIAL_UP	-0.1597	0.256	-0.0563	0.362	-0.108	0.309
PMLPATHWAY	-0.37	0.16	0.029	0.46	-0.1705	0.31
MOREAUX_TACI_HI_IN_BMPC	-0.1273	0.156	-0.0111	0.464	-0.0692	0.31
TSADAC_RKOSILENT_UP	-0.0284	0.442	0.26	0.178	0.1158	0.31
BRG1_ALAB_DN	-0.2403	0.098	-0.002	0.522	-0.12115	0.31
FLAGELLAR_ASSEMBLY	-0.02	0.442	0.2234	0.18	0.1017	0.311
ATP_SYNTHESIS	-0.02	0.442	0.2234	0.18	0.1017	0.311
TYPE_III_SECRETION_SYSTEM	-0.02	0.442	0.2234	0.18	0.1017	0.311
IL6_FIBRO_UP	-0.0768	0.346	0.2167	0.276	0.06995	0.311
STEFFEN_AML_PML_PLZF_TRGT	-0.1338	0.244	-0.0336	0.378	-0.0837	0.311
CHAUHAN_2ME2	0.1987	0.164	-0.0096	0.458	0.09455	0.311
CMV-CHX_HCMV_6HRS_DN	0.2113	0.102	-0.007	0.52	0.10215	0.311
UVC_HIGH_D5_DN	-0.0201	0.468	-0.1878	0.156	-0.10395	0.312
YU_CMYC_DN	-0.4184	0.126	0.0222	0.498	-0.1981	0.312
ABBUD_LIF_UP	-0.1562	0.23	0.0626	0.394	-0.0468	0.312
UV_UNIQUE_FIBRO_UP	-0.0974	0.344	-0.0898	0.282	-0.0936	0.313
DFOSB_BRAIN_8WKS_UP	-0.142	0.188	0.0417	0.438	-0.05015	0.313
TAKEDA_NUP8_HOXA9_10D_UP	-0.1436	0.238	0.0483	0.388	-0.04765	0.313
NAB_LUNG_UP	0.3351	0.092	0.0037	0.534	0.1694	0.313
AGUIRRE_PANCREAS_CHR17	0.0532	0.284	-0.0429	0.344	0.00515	0.314
TGFBETA_C2_UP	-0.0992	0.37	0.3403	0.258	0.12055	0.314
IFN_BETA_GLIOMA_UP	-0.0326	0.432	0.0884	0.196	0.0279	0.314
ONE_CARBON_POOL_BY_FOLATE	-0.2165	0.176	-0.0238	0.452	-0.12015	0.314
ZHAN_MMPC_SIM	0.1397	0.232	-0.0593	0.398	0.0402	0.315
GHPATHWAY	-0.1718	0.306	-0.0937	0.324	-0.13275	0.315
HBX_HCC_UP	0.2858	0.27	0.1129	0.36	0.19935	0.315
BRCA2_BRCA1_UP	0.0794	0.258	0.0462	0.372	0.0628	0.315
UVC_LOW_C3_DN	0.2805	0.212	0.0416	0.418	0.16105	0.315
RADAEVA_IFNA_UP	-0.2843	0.186	-0.003	0.444	-0.14365	0.315
IDX_TSA_UP_CLUSTER1	-0.2567	0.182	-0.0301	0.45	-0.1434	0.316
TPA_SENS_LATE_UP	-0.017	0.476	0.183	0.156	0.083	0.316
BRCA1_OVEREXP_PROSTATE_UP	0.1178	0.286	0.0468	0.348	0.0823	0.317
NAKAJIMA_MCSMBP_EOS	-0.0968	0.306	0.1961	0.33	0.04965	0.318
CMV_HCMV_TIMECOURSE_ALL_DN	-0.029	0.398	-0.0775	0.238	-0.05325	0.318
HYPOPHYSECTOMY_RAT_UP	0.2304	0.21	-0.0703	0.428	0.08005	0.319
ZHAN_MM_CD138_CD2_VS_REST	-0.2198	0.256	-0.0379	0.382	-0.12885	0.319
EPONFKBPATHWAY	-0.065	0.39	-0.2017	0.25	-0.13335	0.32
LEE_TCELLS7_UP	-0.058	0.424	0.3732	0.216	0.1576	0.32
XU_CBP_UP	0.1708	0.182	0.0046	0.458	0.0877	0.32
AD12_24HRS_DN	-0.33	0.182	0.056	0.458	-0.137	0.32
KLEIN_PEL_UP	-0.0596	0.34	0.1021	0.302	0.02125	0.321
H2O2_CSBDIFF_C1	-0.0742	0.37	-0.1669	0.274	-0.12055	0.322
IDX_TSA_UP_CLUSTER3	0.3391	0.142	-0.0088	0.504	0.16515	0.323
SARCOMAS_LEIOMYOSARCOMA_CALP_UP	0.2906	0.222	0.0487	0.426	0.16965	0.324
ADIP_VS_FIBRO_DN	0.2172	0.222	-0.0053	0.426	0.10595	0.324
SHEPARD_CRASH_AND_BURN_MUT_VS_WT_DN	-0.0139	0.49	0.1552	0.16	0.07065	0.325
RARRXRPATHWAY	0.1198	0.224	-0.0235	0.426	0.04815	0.325
HUMAN_TISSUE_KIDNEY	-0.0861	0.364	0.2277	0.288	0.0708	0.326
APPEL_IMATINIB_UP	-0.1684	0.222	0.0464	0.43	-0.061	0.326
ARAPPATHWAY	-0.0724	0.386	-0.1161	0.266	-0.09425	0.326
UV-4NQO_FIBRO_DN	-0.0021	0.526	0.1726	0.126	0.08525	0.326
SPRYPATHWAY	-0.0972	0.288	-0.062	0.366	-0.0796	0.327
MYOD_NIH3T3_UP	-0.0272	0.398	0.2028	0.256	0.0878	0.327
PASSERINI_SIGNAL	-0.0772	0.162	0.0122	0.492	-0.0325	0.327
AGED_MOUSE_HIPPOCAMPUS_ANY_DN	0.1387	0.168	-0.0152	0.486	0.06175	0.327
SCHURINGA_STAT5A_UP	-0.19	0.246	0.0984	0.41	-0.0458	0.328
TSA_HEPATOMA_UP	0.1546	0.286	0.1141	0.37	0.13435	0.328
GAMMA_HEXACHLOROCYCLOHEXANE_DEGRADATION	-0.0014	0.466	0.3956	0.19	0.1971	0.328
GPCRS_CLASS_A_RHODOPSIN_LIKE	-0.0021	0.526	0.3439	0.13	0.1709	0.328
SRCRPTPPATHWAY	-0.2561	0.278	0.0977	0.378	-0.0792	0.328
MUNSHI_MM_VS_PCS_UP	0.1126	0.176	0.0183	0.482	0.06545	0.329
TIS7_OVEREXP_DN	0.1772	0.264	0.0419	0.394	0.10955	0.329
HDACI_COLON_CLUSTER5	-0.2386	0.15	-0.0007	0.508	-0.11965	0.329
NDKDYNAMINPATHWAY	-0.0793	0.324	-0.1033	0.336	-0.0913	0.33
DER_IFNA_UP	-0.044	0.436	-0.21	0.224	-0.127	0.33
INTRINSICPATHWAY	-0.0548	0.434	0.3746	0.226	0.1599	0.33
NADLER_OBESITY_HYPERGLYCEMIA	-0.0736	0.214	-0.0246	0.446	-0.0491	0.33
MTA3PATHWAY	0.2261	0.2	0.0738	0.46	0.14995	0.33
EPOPATHWAY	0.0913	0.242	0.0709	0.42	0.0811	0.331
HINATA_NFKB_UP	-0.0625	0.352	0.0856	0.31	0.01155	0.331
SMALL_LIGAND_GPCRS	-0.1282	0.35	0.1232	0.312	-0.0025	0.331
CHEMICALPATHWAY	0.1074	0.298	0.0588	0.366	0.0831	0.332
GPCRDB_CLASS_C_METABOTROPIC_GLUTAMATE_PHEROMONE	0.1397	0.278	0.1319	0.388	0.1358	0.333
NUMATA_G_CSF_DIFF	-0.1605	0.254	-0.0173	0.414	-0.0889	0.334
TAKEDA_NUP8_HOXA9_16D_UP	-0.1538	0.156	-0.0067	0.512	-0.08025	0.334
WALLACE_JAK2_DIFF	0.1908	0.2	0.0242	0.468	0.1075	0.334
BCNU_GLIOMA_MGMT_24HRS_DN	0.0828	0.292	0.1245	0.378	0.10365	0.335
ROSS_FAB_M7	-0.0656	0.362	0.1068	0.308	0.0206	0.335
5FU_RESIST_GASTRIC_DN	-0.0348	0.45	0.264	0.22	0.1146	0.335
POD1_KO_MOST_UP	-0.0256	0.49	0.3523	0.182	0.16335	0.336
TAKEDA_NUP8_HOXA9_6H_UP	-0.0701	0.362	-0.0862	0.31	-0.07815	0.336
HDACI_COLON_TSA12HRS_UP	-0.1191	0.278	-0.0513	0.394	-0.0852	0.336
CIS_XPC_UP	0.1278	0.266	0.0408	0.406	0.0843	0.336
DEATHPATHWAY	-0.0939	0.374	-0.1151	0.3	-0.1045	0.337
HDACI_COLON_BUT12HRS_UP	-0.0816	0.322	-0.036	0.352	-0.0588	0.337
CMV_HCMV_TIMECOURSE_48HRS_UP	-0.0297	0.418	0.096	0.256	0.03315	0.337
XPB_TTD-CS_DN	-0.0288	0.468	0.289	0.206	0.1301	0.337
SA_B_CELL_RECEPTOR_COMPLEXES	-0.0524	0.398	-0.1297	0.276	-0.09105	0.337
TIDPATHWAY	-0.3023	0.26	0.0563	0.416	-0.123	0.338
KANG_TERT_UP	-0.0069	0.482	0.1895	0.194	0.0913	0.338
AS3_FIBRO_UP	0.0818	0.258	0.0471	0.42	0.06445	0.339
AS3_FIBRO_C3	0.0818	0.258	0.0471	0.42	0.06445	0.339
UVC_LOW_C2_DN	0.1596	0.302	0.0633	0.376	0.11145	0.339
UVB_NHEK3_C7	-0.0986	0.254	0.0618	0.424	-0.0184	0.339
NGFPATHWAY	-0.0647	0.374	-0.1067	0.306	-0.0857	0.34
HPV31_UP	-0.0825	0.238	0.0182	0.442	-0.03215	0.34
NTHIPATHWAY	0.1074	0.272	-0.0259	0.41	0.04075	0.341
AGEING_BRAIN_UP	-0.024	0.43	-0.0818	0.252	-0.0529	0.341
ATMPATHWAY	-0.0424	0.416	-0.1261	0.266	-0.08425	0.341
INOS_ALL_DN	-0.0288	0.412	-0.0538	0.272	-0.0413	0.342
HDACI_COLON_BUT12HRS_DN	0.0945	0.268	-0.0482	0.418	0.02315	0.343
PREADIP_VS_FIBRO_UP	-0.2157	0.2	0.0312	0.486	-0.09225	0.343
YE_INTRAMETASTATIC_HCC_UP	-0.0133	0.51	0.2191	0.178	0.1029	0.344
TALL1PATHWAY	-0.041	0.474	-0.2625	0.214	-0.15175	0.344
HSC_INTERMEDIATEPROGENITORS_FETAL	0.052	0.22	-0.0114	0.468	0.0203	0.344
HYPOPHYSECTOMY_RAT_DN	0.1469	0.228	0.0375	0.46	0.0922	0.344
DER_IFNG_UP	-0.064	0.334	-0.0526	0.356	-0.0583	0.345
BLYMPHOCYTEPATHWAY	-0.3247	0.276	-0.0894	0.414	-0.20705	0.345
APOPTOSIS	-0.1031	0.334	-0.0477	0.358	-0.0754	0.346
MARCINIAK_CHOP_DIFF	-0.0712	0.336	-0.0822	0.356	-0.0767	0.346
UVB_NHEK4_6HRS_UP	-0.0116	0.484	-0.1232	0.208	-0.0674	0.346
PASSERINI_INFLAMMATION	0.1001	0.268	0.0782	0.424	0.08915	0.346
HSC_EARLYPROGENITORS_FETAL	0.0573	0.24	0.0076	0.454	0.03245	0.347
HSC_EARLYPROGENITORS_SHARED	0.0573	0.24	0.0076	0.454	0.03245	0.347
FLECHNER_KIDNEY_TRANSPLANT_WELL_DN	0.1757	0.208	0.0085	0.488	0.0921	0.348
HSC_INTERMEDIATEPROGENITORS_SHARED	0.0566	0.254	0.0091	0.442	0.03285	0.348
CELL_ADHESION_RECEPTOR_ACTIVITY	0.1637	0.276	0.0448	0.42	0.10425	0.348
CMV_HCMV_TIMECOURSE_20HRS_DN	-0.0158	0.482	0.1259	0.218	0.05505	0.35
MARTINELLI_IFNS_DIFF	-0.0887	0.356	0.1846	0.344	0.04795	0.35
BILE_ACID_BIOSYNTHESIS	-0.0562	0.398	-0.1118	0.304	-0.084	0.351
ZHAN_MMPC_PC	-0.306	0.3	0.0406	0.402	-0.1327	0.351
CITED1_KO_HET_UP	-0.1365	0.31	0.0813	0.392	-0.0276	0.351
BRCA_BRCA1_POS	-0.0557	0.386	-0.0979	0.318	-0.0768	0.352
CHEN_LUNG_SURVIVAL	0.2352	0.192	0.0113	0.512	0.12325	0.352
GALACTOSE_METABOLISM	-0.0381	0.45	0.1575	0.254	0.0597	0.352
HDACI_COLON_SUL16HRS_UP	-0.1215	0.238	0.0188	0.466	-0.05135	0.352
SANA_IFNG_ENDOTHELIAL_UP	-0.2332	0.232	0.0255	0.472	-0.10385	0.352
RELAPATHWAY	-0.321	0.184	0.017	0.52	-0.152	0.352
CMV_HCMV_6HRS_DN	-0.236	0.236	0.0023	0.468	-0.11685	0.352
ALZHEIMERS_INCIPIENT_DN	0.0358	0.286	-0.03	0.42	0.0029	0.353
IDX_TSA_DN_CLUSTER3	0.0993	0.246	0.0297	0.462	0.0645	0.354
HSC_EARLYPROGENITORS_ADULT	0.0569	0.248	0.0063	0.46	0.0316	0.354
ADIP_DIFF_CLUSTER2	-0.1241	0.304	-0.0302	0.404	-0.07715	0.354
ET743_HELA_UP	-0.1081	0.37	0.0692	0.338	-0.01945	0.354
ST_INTERLEUKIN_4_PATHWAY	-0.0293	0.482	-0.1315	0.23	-0.0804	0.356
GOLUB_ALL_VS_AML_UP	-0.0938	0.342	-0.1672	0.37	-0.1305	0.356
ERM_KO_SERTOLI_DN	-0.0632	0.386	0.1137	0.33	0.02525	0.358
PASSERINI_ADHESION	-0.026	0.452	0.1543	0.268	0.06415	0.36
BRCA_ER_POS	-0.0501	0.318	0.0156	0.402	-0.01725	0.36
ABBUD_LIF_DN	0.1788	0.264	0.0161	0.456	0.09745	0.36
ERK5PATHWAY	-0.0422	0.496	-0.1627	0.228	-0.10245	0.362
BASSO_HCL_DIFF	-0.1217	0.288	-0.0213	0.436	-0.0715	0.362
MANALO_HYPOXIA_UP	-0.0315	0.446	0.1648	0.278	0.06665	0.362
BASSO_GERMINAL_CENTER_CD40_UP	-0.264	0.284	0.0358	0.442	-0.1141	0.363
BECKER_TAMOXIFEN_RESISTANT_UP	-0.1197	0.25	-0.0071	0.48	-0.0634	0.365
ST_P38_MAPK_PATHWAY	-0.0893	0.314	-0.0247	0.416	-0.057	0.365
TPA_RESIST_LATE_UP	-0.0125	0.486	0.1146	0.248	0.05105	0.367
STRESS_GENOTOXIC_SPECIFIC_DN	-0.0153	0.48	-0.0866	0.254	-0.05095	0.367
HSP27PATHWAY	0.1423	0.288	0.0248	0.446	0.08355	0.367
MIDDLEAGE_UP	-0.0975	0.376	0.1945	0.36	0.0485	0.368
ARGININE_AND_PROLINE_METABOLISM	0.0928	0.274	-0.0065	0.462	0.04315	0.368
TYROSINE_METABOLISM	-0.0038	0.494	0.312	0.242	0.1541	0.368
ET743PT650_COLONCA_DN	0.1085	0.268	0.0102	0.468	0.05935	0.368
CBLPATHWAY	-0.171	0.316	0.0813	0.426	-0.04485	0.371
TAVOR_CEBP_UP	-0.0716	0.404	0.0835	0.338	0.00595	0.371
AMINOACYL_TRNA_BIOSYNTHESIS	-0.13	0.338	-0.0894	0.404	-0.1097	0.371
CARDIACEGFPATHWAY	-0.1091	0.386	-0.0957	0.356	-0.1024	0.371
ELECTRON_TRANSPORT	-0.0392	0.338	0.0491	0.406	0.00495	0.372
LIZUKA_L1_GR_G1	-0.013	0.444	0.1061	0.3	0.04655	0.372
WNT_SIGNALING	-0.0257	0.43	0.053	0.314	0.01365	0.372
CHESLER_BRAIN_CIS_GENES	0.0678	0.304	0.0148	0.444	0.0413	0.374
WERNER_FIBRO_DN	-0.0132	0.412	0.0267	0.336	0.00675	0.374
FALT_BCLL_UP	0.1058	0.284	0.039	0.464	0.0724	0.374
UV-4NQO_FIBRO_UP	-0.0758	0.316	-0.0518	0.432	-0.0638	0.374
STRESS_TPA_SPECIFIC_UP	-0.1156	0.348	0.0242	0.404	-0.0457	0.376
HOGERKORP_CD44_UP	-0.0932	0.366	0.1344	0.386	0.0206	0.376
RORIE_ES_PNET_DN	-0.0095	0.474	0.2541	0.28	0.1223	0.377
LIZUKA_G2_GR_G3	-0.0264	0.456	-0.156	0.298	-0.0912	0.377
UVC_TTD_4HR_UP	-0.0841	0.33	0.0898	0.428	0.00285	0.379
ST_T_CELL_SIGNAL_TRANSDUCTION	-0.116	0.286	0.0094	0.472	-0.0533	0.379
ZHAN_MM_CD138_MF_VS_REST	-0.0467	0.436	0.099	0.322	0.02615	0.379
ASTIER_BCELL	-0.0682	0.3	0.013	0.464	-0.0276	0.382
NICOTINATE_AND_NICOTINAMIDE_METABOLISM	-0.2626	0.27	-0.0051	0.496	-0.13385	0.383
IL2PATHWAY	-0.089	0.348	0.0701	0.42	-0.00945	0.384
ERYTHPATHWAY	-0.1411	0.322	0.056	0.446	-0.04255	0.384
UREA_CYCLE_AND_METABOLISM_OF_AMINO_GROUPS	0.2781	0.276	0.013	0.494	0.14555	0.385
TAKEDA_NUP8_HOXA9_3D_DN	-0.0072	0.476	0.1036	0.296	0.0482	0.386
GENOTOXINS_4HRS_DISCR	-0.0312	0.442	0.0594	0.336	0.0141	0.389
GOLDRATH_CYTOLYTIC	-0.1606	0.322	-0.0247	0.456	-0.09265	0.389
CPR_LOW_LIVER_UP	-0.0818	0.386	-0.0609	0.396	-0.07135	0.391
GLUTAMATE_METABOLISM	-0.0322	0.444	-0.0688	0.338	-0.0505	0.391
GOLUB_ALL_VS_AML_DN	-0.1807	0.278	0.0441	0.504	-0.0683	0.391
GUO_HEX_UP	-0.0543	0.308	-0.0136	0.486	-0.03395	0.397
ECMPATHWAY	-0.0529	0.46	-0.0794	0.334	-0.06615	0.397
UEDA_MOUSE_LIVER	0.0445	0.304	0.0079	0.494	0.0262	0.399
BCRPATHWAY	-0.0045	0.556	-0.1298	0.242	-0.06715	0.399
NF90_DN	-0.0355	0.432	0.1041	0.366	0.0343	0.399
IRS1_KO_ADIP_DN	-0.0104	0.446	0.045	0.352	0.0173	0.399
TCRAPATHWAY	-0.1567	0.37	-0.1101	0.43	-0.1334	0.4
LIAN_MYELOID_DIFF_GRANULE	-0.0443	0.444	-0.079	0.356	-0.06165	0.4
MATSUDA_VALPHAINKT_DIFF	-0.0117	0.454	0.0288	0.348	0.00855	0.401
ET743_RESIST_DN	0.1171	0.3	0.0185	0.504	0.0678	0.402
HISTIDINE_METABOLISM	-0.0439	0.426	0.094	0.378	0.02505	0.402
AD12_ANY_DN	-0.1065	0.404	-0.0167	0.404	-0.0616	0.404
ST_WNT_CA2_CYCLIC_GMP_PATHWAY	-0.0517	0.38	-0.0615	0.428	-0.0566	0.404
STARCH_AND_SUCROSE_METABOLISM	-0.084	0.35	0.0295	0.46	-0.02725	0.405
RORIE_ES_PNET_UP	-0.0423	0.448	0.0654	0.368	0.01155	0.408
IFN_GAMMA_UP	-0.061	0.35	0.024	0.466	-0.0185	0.408
IL3PATHWAY	-0.0353	0.48	0.1513	0.338	0.058	0.409
HYPOXIA_REVIEW	-0.0448	0.396	0.0442	0.422	-0.0003	0.409
IFNALPHA_HCC_UP	-0.021	0.492	0.1193	0.326	0.04915	0.409
KLEIN_PEL_DN	-0.1469	0.384	0.0135	0.436	-0.0667	0.41
BIOGENIC_AMINE_SYNTHESIS	-0.074	0.342	-0.0097	0.48	-0.04185	0.411
ASTON_DEPRESSION_UP	-0.0002	0.486	0.0569	0.336	0.02835	0.411
WONG_IFNA_HCC_RESISTANT_VS_SENSITIVE_DN	-0.0308	0.43	0.035	0.398	0.0021	0.414
POMEROY_MD_TREATMENT_GOOD_VS_POOR_UP	-0.0074	0.524	0.0948	0.306	0.0437	0.415
ZMPSTE24_KO_DN	-0.0488	0.432	-0.0247	0.4	-0.03675	0.416
JNK_DN	-0.0687	0.352	0.0067	0.482	-0.031	0.417
ETSPATHWAY	-0.0428	0.438	0.0877	0.396	0.02245	0.417
ERKPATHWAY	-0.0249	0.504	-0.0637	0.334	-0.0443	0.419
IGF1_NIH3T3_UP	-0.0489	0.354	-0.0069	0.488	-0.0279	0.421
AGUIRRE_PANCREAS_CHR9	-0.0279	0.46	-0.0518	0.384	-0.03985	0.422
CMV_8HRS_DN	-0.086	0.328	0.0123	0.516	-0.03685	0.422
OXSTRESS_BREASTCA_UP	-0.0347	0.412	0.0199	0.442	-0.0074	0.427
HDACI_COLON_SUL24HRS_DN	-0.0219	0.396	-0.0231	0.46	-0.0225	0.428
TSADAC_RKOEXP_UP	-0.0126	0.512	0.1201	0.346	0.05375	0.429
WIELAND_HEPATITIS_B_INDUCED	-0.133	0.366	-0.002	0.492	-0.0675	0.429
IRITANI_ADPROX_LYMPH	-0.0101	0.484	0.0645	0.374	0.0272	0.429
WNT_TARGETS	-0.037	0.428	-0.054	0.434	-0.0455	0.431
AGEING_LYMPH_DN	-0.0127	0.492	-0.1543	0.374	-0.0835	0.433
TGF_BETA_SIGNALING_PATHWAY	-0.0351	0.424	-0.0272	0.442	-0.03115	0.433
STEMPATHWAY	-0.0191	0.486	0.0784	0.394	0.02965	0.44
FALT_BCLL_IG_MUTATED_VS_WT_UP	-0.0065	0.446	0.0377	0.436	0.0156	0.441
GN_CAMP_GRANULOSA_DN	-0.018	0.44	-0.0156	0.444	-0.0168	0.442
WNTPATHWAY	-0.0187	0.468	-0.0217	0.42	-0.0202	0.444
HOGERKORP_ANTI_CD44_UP	-0.016	0.498	0.1038	0.396	0.0439	0.447
ZHAN_TONSIL_BONEMARROW	-0.0089	0.448	-0.025	0.462	-0.01695	0.455
LEE_TCELLS6_UP	-0.0077	0.46	-0.0158	0.45	-0.01175	0.455
UV_ESR_OLD_UNREG	-0.0246	0.47	0.0299	0.44	0.00265	0.455
LH_GRANULOSA_DN	-0.0023	0.484	0.0582	0.428	0.02795	0.456
FSH_GRANULOSA_DN	-0.0023	0.484	0.0582	0.428	0.02795	0.456
BRG1_ALAB_UP	-0.0148	0.452	-0.0031	0.46	-0.00895	0.456
RETT_UP	-0.0029	0.458	0.0231	0.466	0.0101	0.462
ST_TUMOR_NECROSIS_FACTOR_PATHWAY	-0.0494	0.456	0.0391	0.47	-0.00515	0.463
HDACI_COLON_BUT24HRS_DN	-0.014	0.416	-0.0023	0.512	-0.00815	0.464
MENSE_HYPOXIA_TRANSPORTER_GENES	-0.0057	0.46	0.0268	0.468	0.01055	0.464
HDACI_COLON_CUR2HRS_UP	-0.0245	0.468	0.0088	0.462	-0.00785	0.465
CMV_HCMV_TIMECOURSE_14HRS_UP	-0.0319	0.47	0.0232	0.462	-0.00435	0.466
CARM_ERPATHWAY	-0.0022	0.478	0.015	0.458	0.0064	0.468
NI2_LUNG_DN	-0.0051	0.518	-0.0607	0.424	-0.0329	0.471
LIZUKA_L0_SM_L1	-0.0303	0.466	-0.0084	0.488	-0.01935	0.477
CALRES_RHESUS_DN	-0.0194	0.504	0.0015	0.462	-0.00895	0.483
LIAN_MYELOID_DIFF_TF	-0.034	0.442	0.0221	0.526	-0.00595	0.484
BYSTROM_IL5_UP	-0.0212	0.474	0.0105	0.504	-0.00535	0.489
AD12_32HRS_DN	-0.0185	0.486	0.0179	0.5	-0.0003	0.493
